# Supplementary material
Source: PubMed Central journal article supplement (PMC6592718)
Supplement: NIHMS1526751-supplement-13361_2019_2192_MOESM1_ESM.pdf [file NIHMS1526751-supplement-13361_2019_2192_MOESM1_ESM.pdf]

## Selenoproteome Identification in Inflamed Murine Primary Bone Marrow-derived Macrophages by nano-LC Orbitrap Fusion Tribrid Mass Spectrometry

Arvind M. Korwar<sup>1</sup>, Ashley E. Shay<sup>1</sup>, Venkatesha Basrur<sup>2</sup>, Kevin Conlon<sup>2</sup>, K. Sandeep Prabhu<sup>1\*</sup>

<sup>1</sup> Department of Veterinary and Biomedical Sciences and The Pennsylvania State University Cancer Institute, 115 Henning Building, The Pennsylvania State University, University Park, PA, 16802, USA.

<sup>2</sup> Department of Pathology, Proteomics Research Core Facility, University of Michigan Medical School, Ann Arbor, MI, USA

\*Address reprint requests to: K. Sandeep Prabhu, 115 Henning Building Department of Veterinary and Biomedical Sciences, and The Penn State Cancer Institute, The Pennsylvania State University, University Park, PA, 16802, USA; (E mail: ksp4@psu.edu)

Figure S1. MS/MS spectra of representative selenoprotein peptides found in TMT data-set acquired on high resolution accurate mass spectrometry (HR/AM) Orbitrap Fusion MS

| Sl | Uniprot Accession | Gene name |
|----|-------------------|-----------|
| 1  | P11352            | Gpx1      |
| 2  | O70325            | Gpx4      |
| 3  | Q9JMH6            | Txnrd1    |
| 4  | Q9JLT4            | Txnrd2    |
| 5  | Q9JLC3            | Msrb1     |
| 6  | Q9ERR7            | Selenof   |
| 7  | Q80TA1            | Selenoi   |
| 8  | Q9JLJ1            | Selenok   |
| 9  | Q8VHC3            | Selenom   |
| 10 | D3Z2R5            | Selenon   |
| 11 | Q9BCZ4            | Selenos   |
| 12 | P62342            | Selenot   |
| 13 | P63300            | Selenow   |

Sequence: TIDIEPDIETLLSQSGNS, T1-TMT6plex (229.16293 Da)

Charge: +2, Monoisotopic m/z: 1145.08630 Da (-0.29 mmu/-0.26 ppm), MH+: 2289.16533 Da, RT: 146.1475 min,

Identified with: Sequest HT (v1.17); XCorr:6.18, Percolator q-Value:0.0e0, Percolator PEP:1.3e-5, Ions matched by search engine: 0/0

Fragment match tolerance used for search: 0.6 Da

Fragments used for search: b; b-H<sub>2</sub>O; b-NH<sub>3</sub>; y; y-H<sub>2</sub>O; y-NH<sub>3</sub>

Protein references (1): - Glutathione peroxidase 1 OS=Mus musculus OX=10090 GN=Gpx1 PE=1 SV=2

Sandeep\_TMT#1\_2.raw #67193 RT: 146.1475 min  
ITMS, 1145.5879@cid35.00, z=+2, Mono m/z=1145.08630 Da, MH+=2289.16533 Da, Match Tol.=0.6 Da

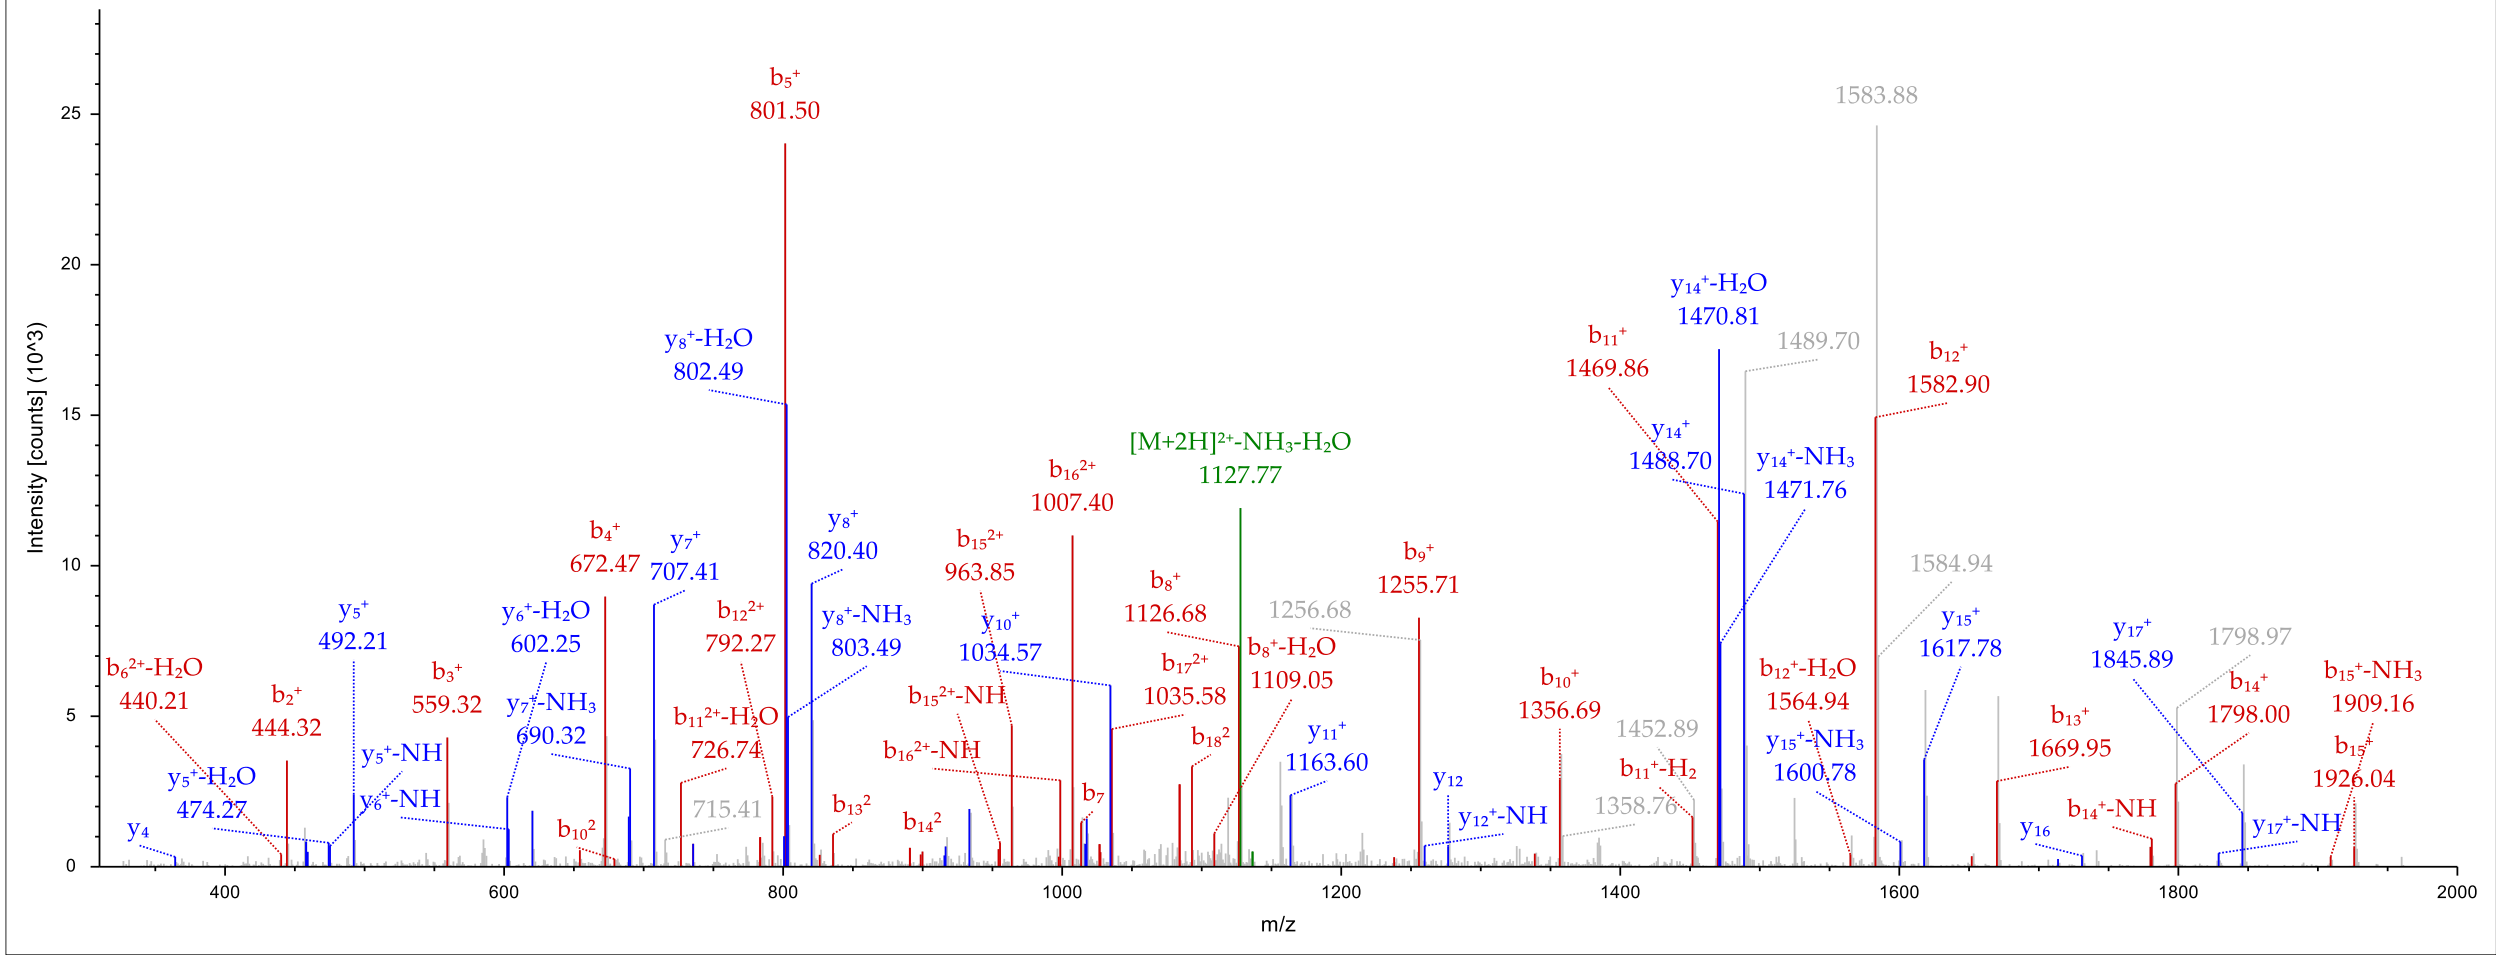

# Peptide consensus view

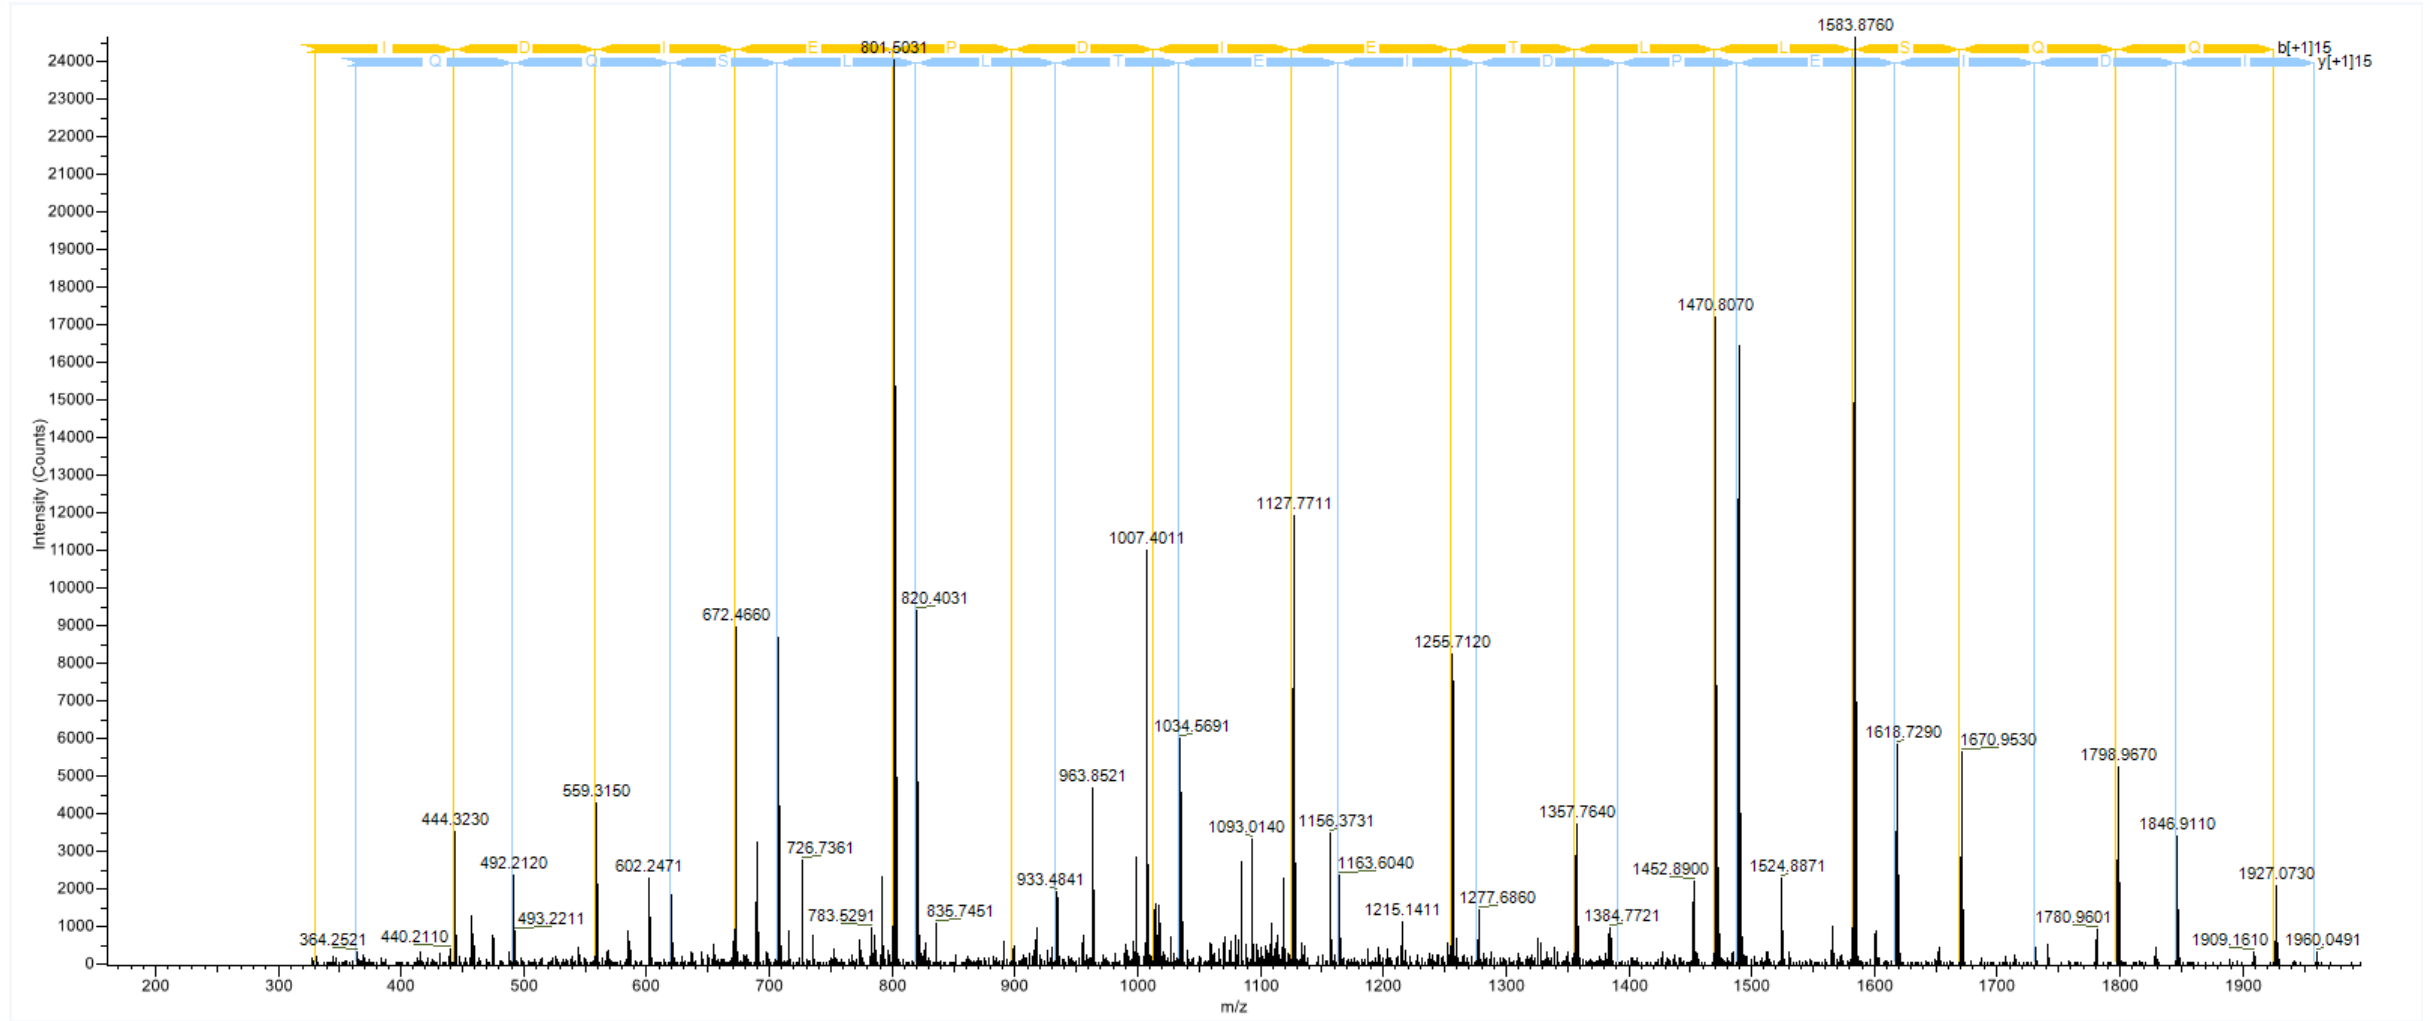

t I D I E P D I E T L L S Q Q S G N S

Sequence: YVRPGGGFEPNFTLFEK, K17-TMT6plex (229.16293 Da), Y1-TMT6plex (229.16293 Da)  
Charge: +3, Monoisotopic m/z: 806.10614 Da (-0.89 mmu/-1.11 ppm), MH+: 2416.30387 Da, RT: 135.8448 min,  
Identified with: Sequest HT (v1.17); XCorr:5.73, Percolator q-Value:0.0e0, Percolator PEP:3.2e-5, Ions matched by search engine: 0/0  
Fragment match tolerance used for search: 0.6 Da  
Fragments used for search: b; b-H<sub>2</sub>O; b-NH<sub>3</sub>; y; y-H<sub>2</sub>O; y-NH<sub>3</sub>  
Protein references (1): - Glutathione peroxidase 1 OS=Mus musculus OX=10090 GN=Gpx1 PE=1 SV=2

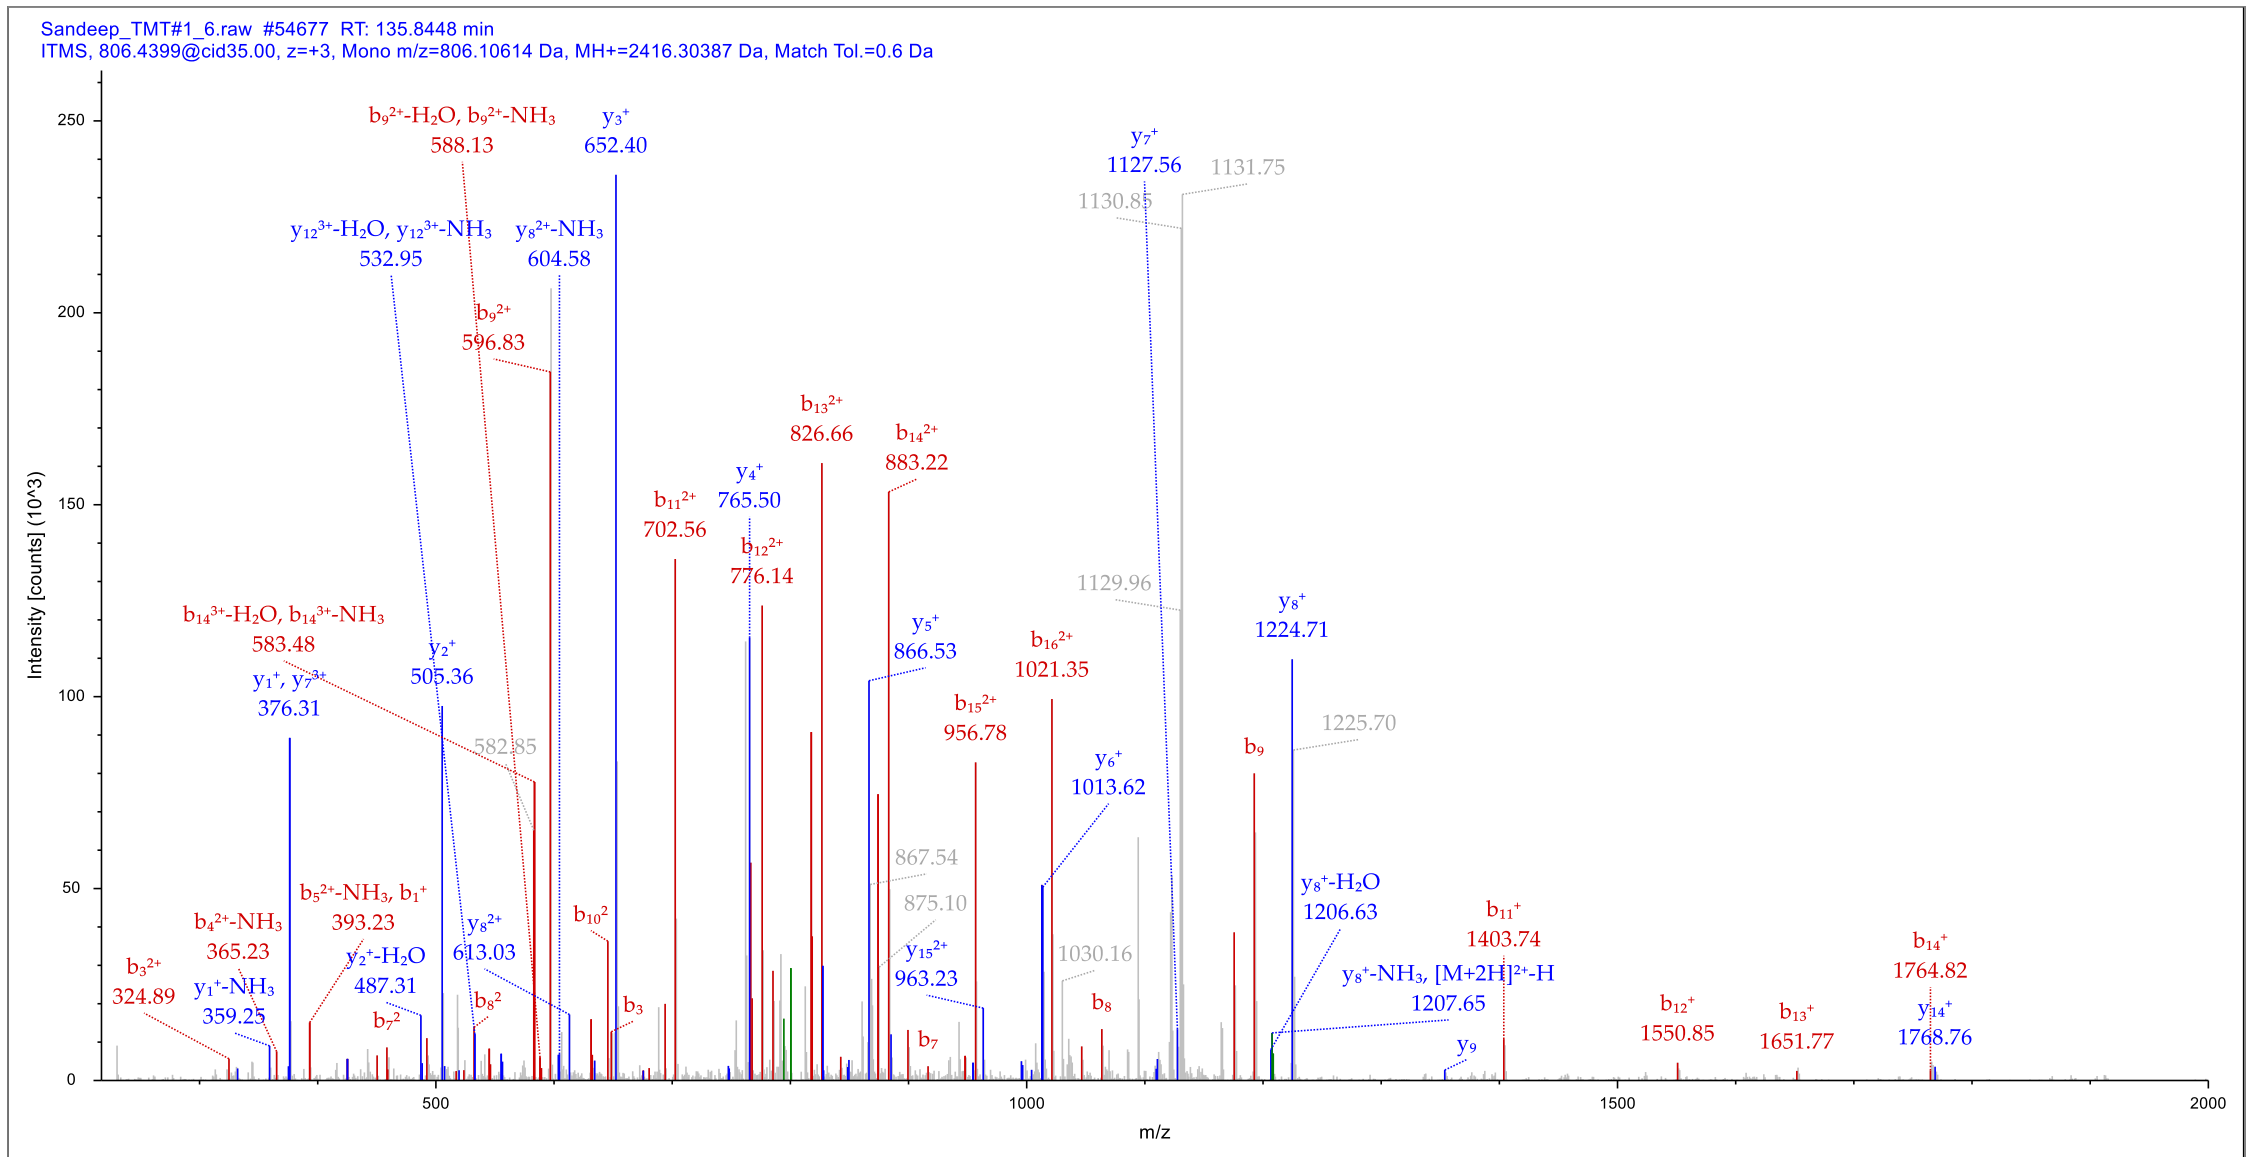

# Peptide consensus view

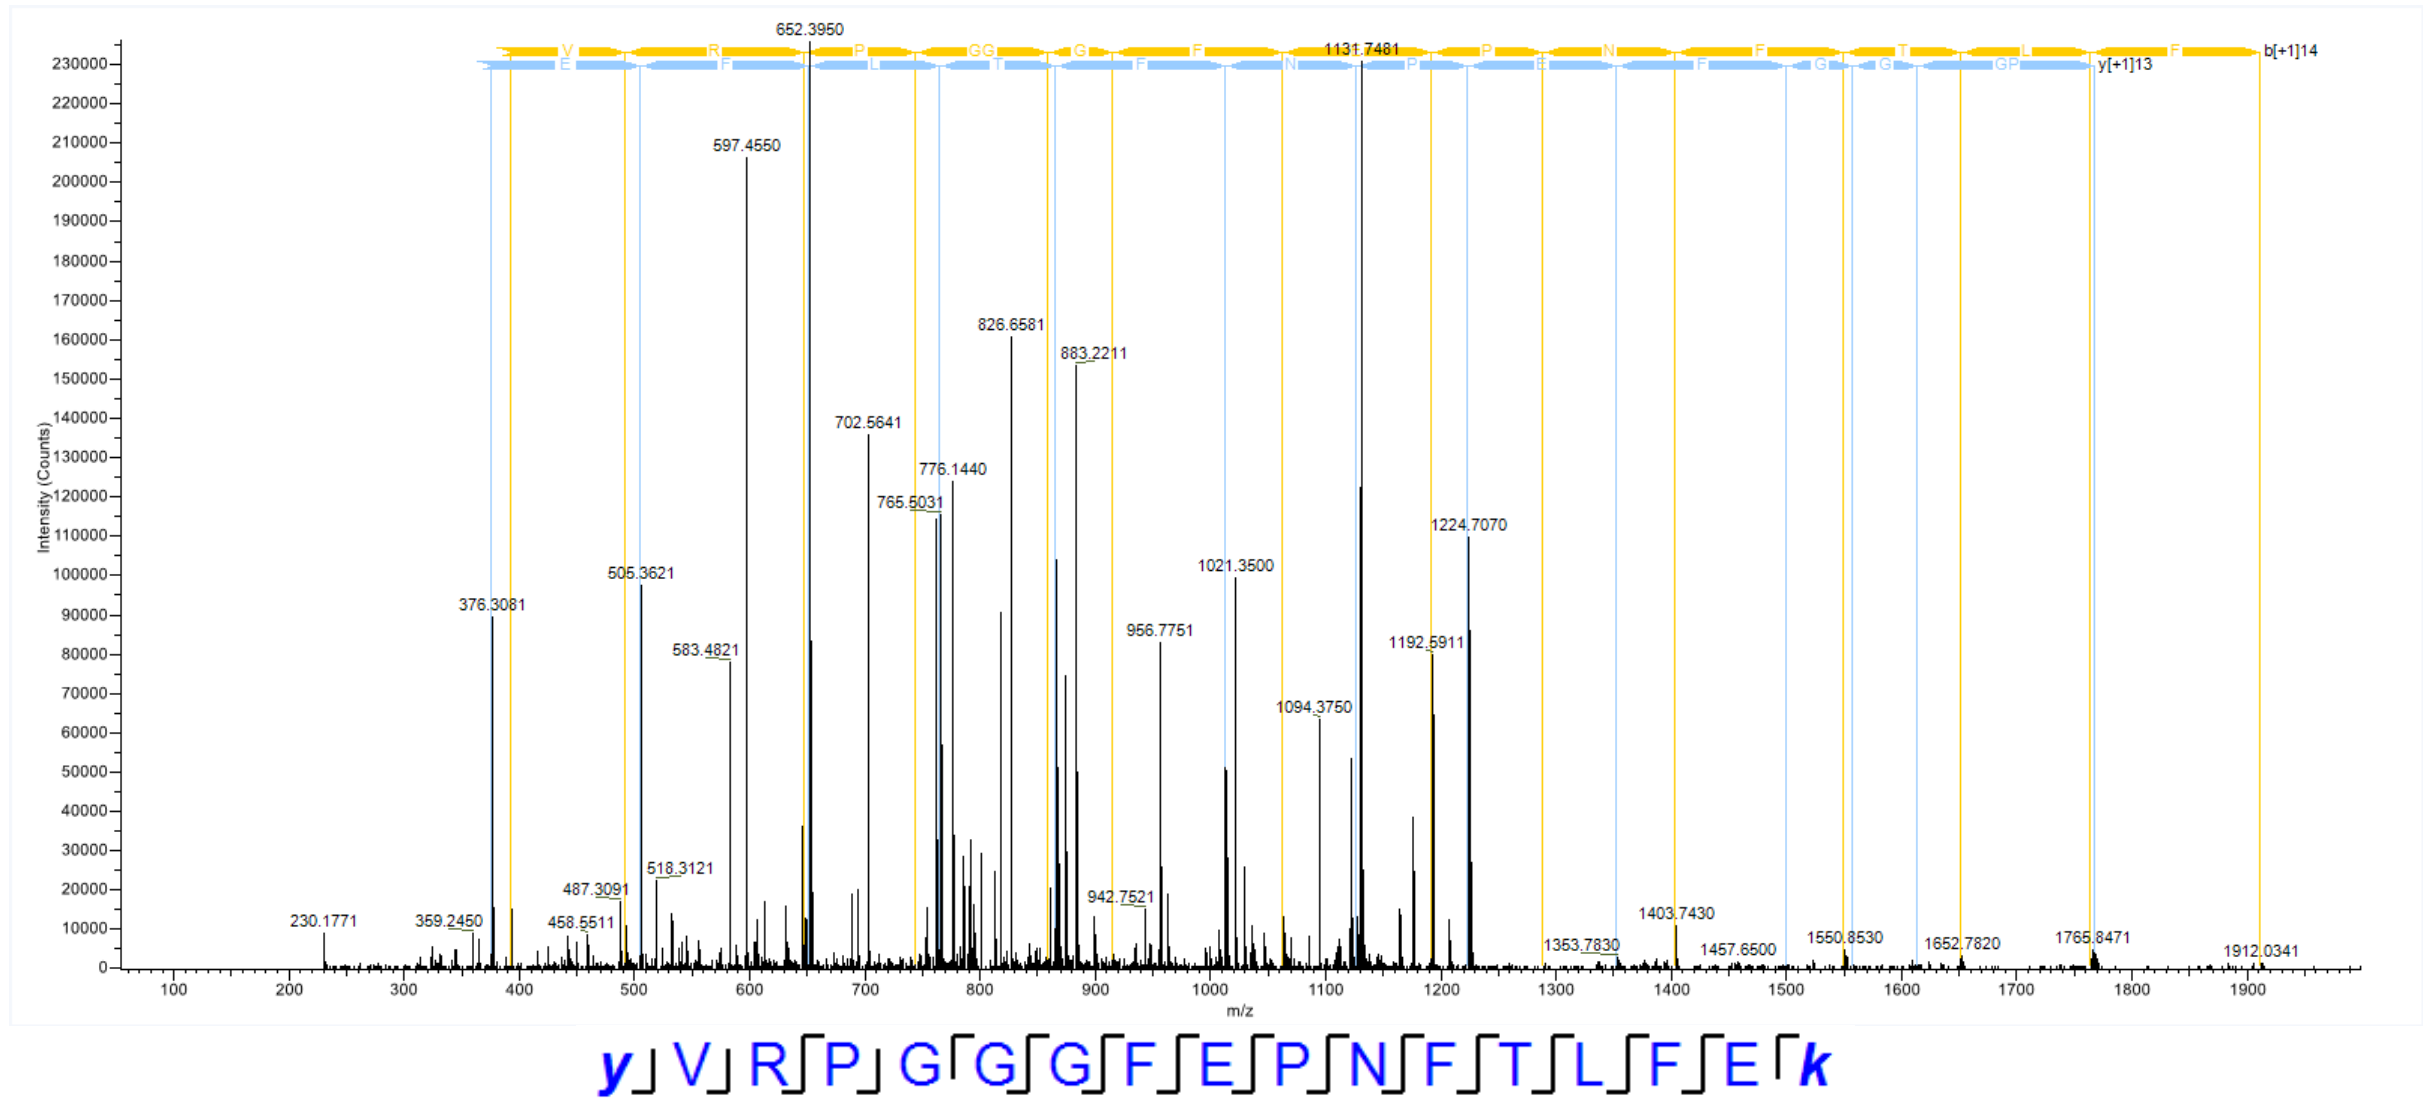

Sequence: DIDGHMVCLDK, C8-Carbamidomethyl (57.02146 Da), K11-TMT6plex (229.16293 Da), D1-TMT6plex (229.16293 Da)  
 Charge: +3, Monoisotopic m/z: 587.64124 Da (+0.54 mmu/+0.91 ppm), MH+: 1760.90915 Da, RT: 99.5913 min,  
 Identified with: Sequest HT (v1.17); XCorr:4.99, Percolator q-Value:0.0e0, Percolator PEP:9.4e-5, Ions matched by search engine: 0/0  
 Fragment match tolerance used for search: 0.6 Da  
 Fragments used for search: b; b-H<sub>2</sub>O; y; y-H<sub>2</sub>O; y-NH<sub>3</sub>  
 Protein references (1): Phospholipid hydroperoxide glutathione peroxidase OS=Mus musculus OX=10090 GN=Gpx4 PE=1 SV=4

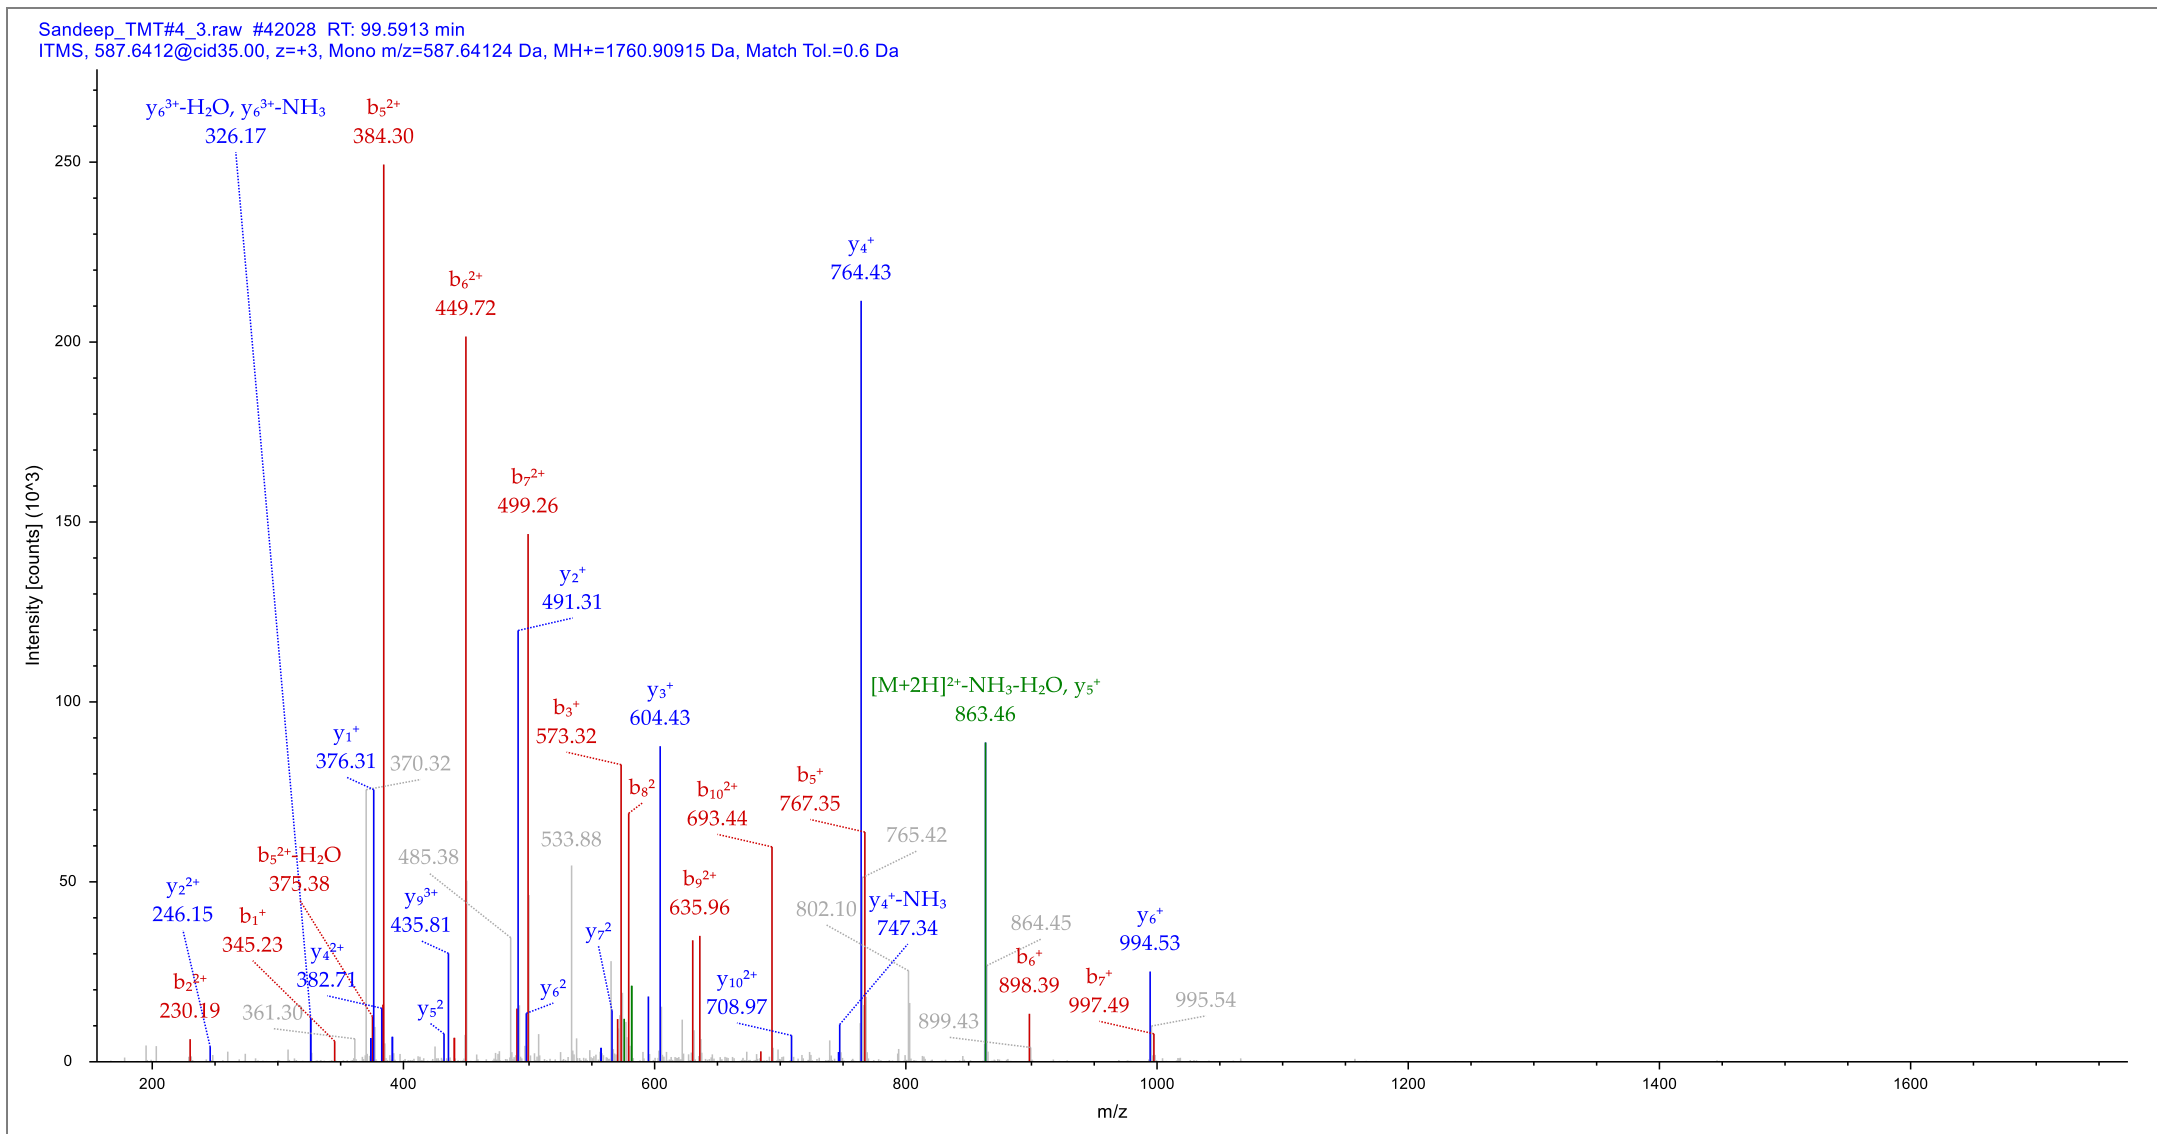

# Peptide consensus view

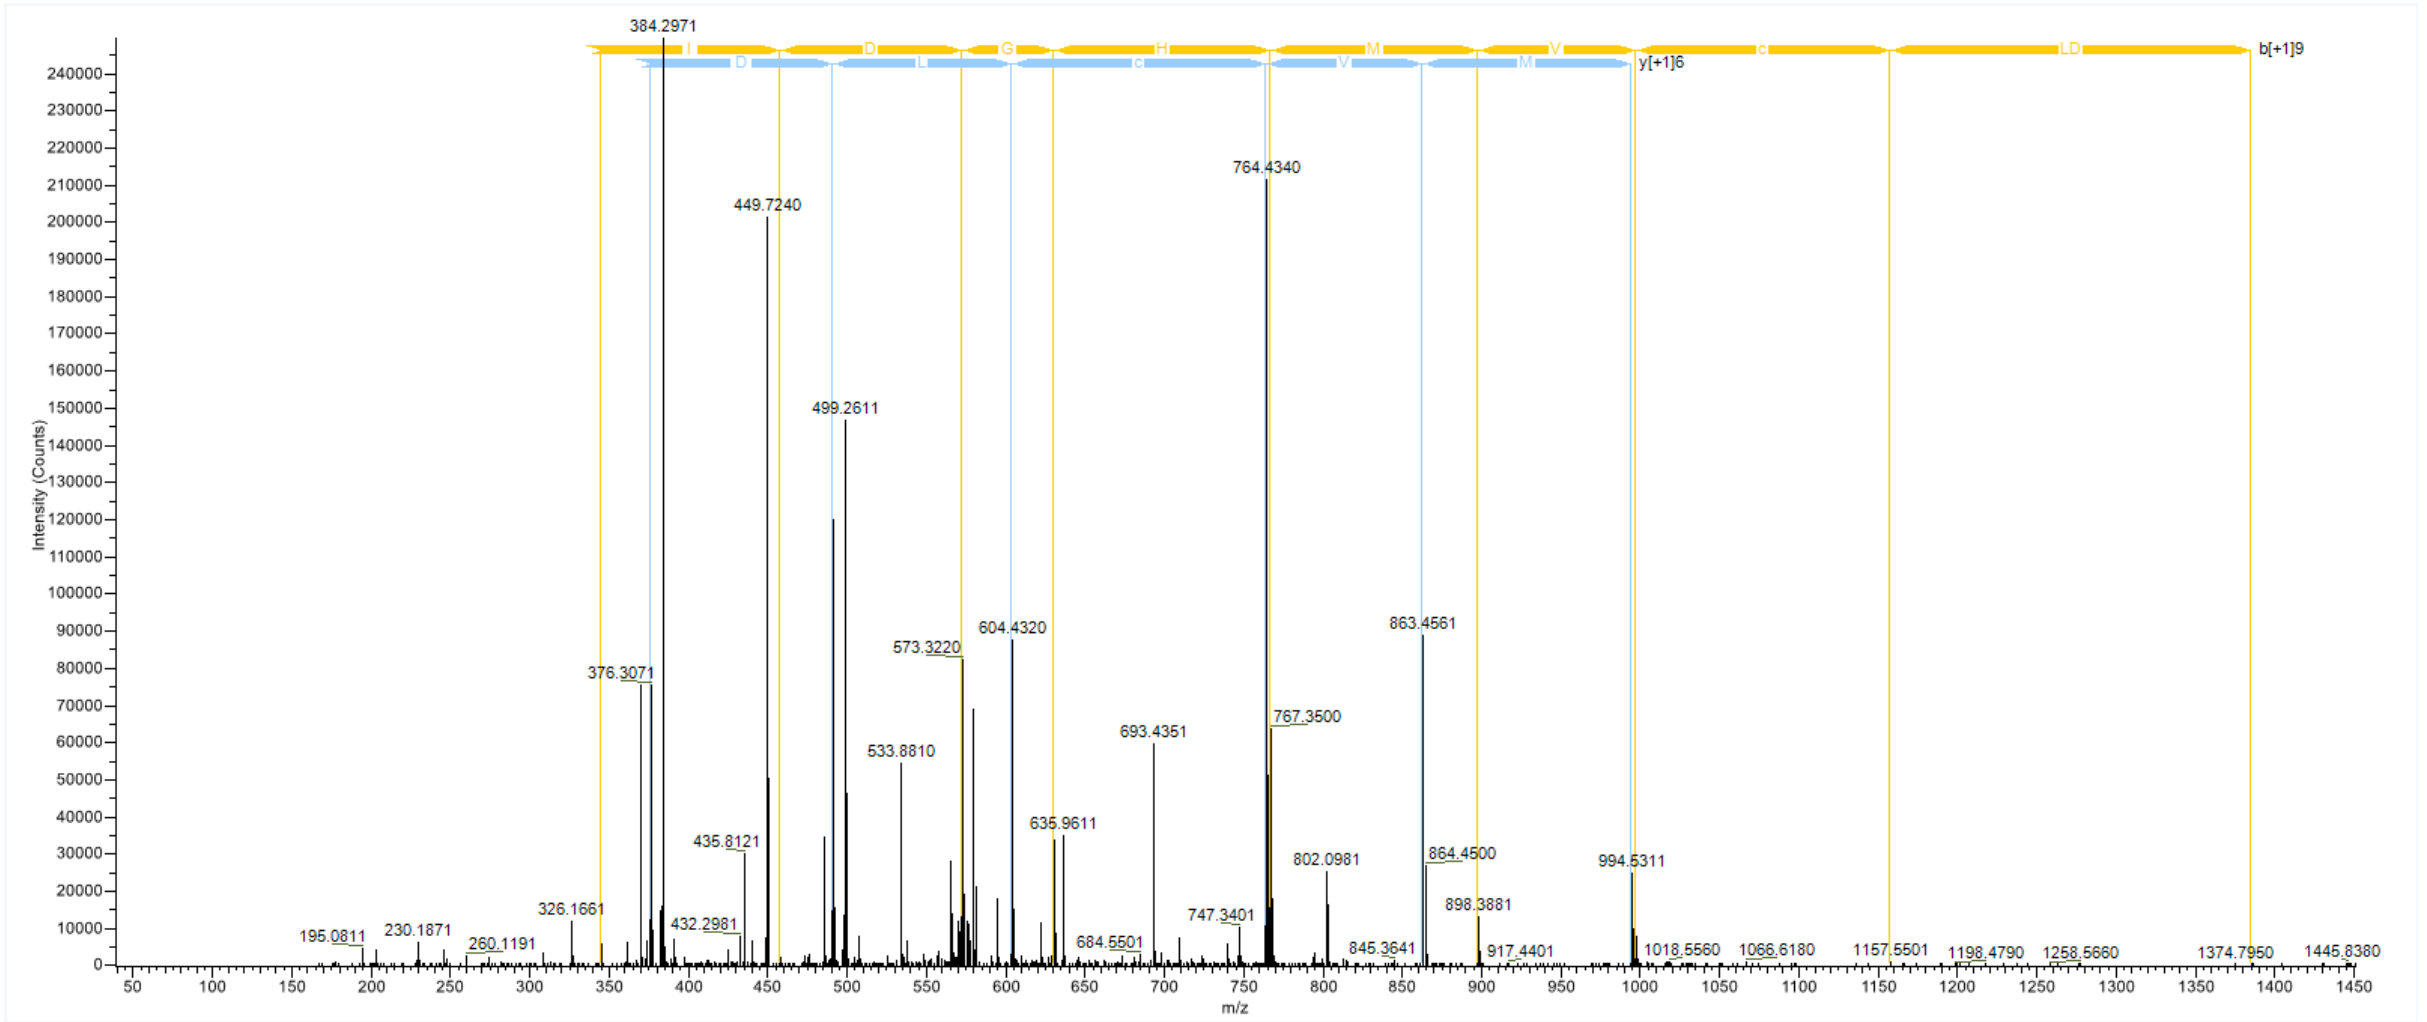

d I D G H M V c L D k

Sequence: TDVNYTQLVDLHAR, T1-TMT6plex (229.16293 Da)

Charge: +3, Monoisotopic m/z: 625.33752 Da (+0.36 mmu/+0.58 ppm), MH+: 1873.99802 Da, RT: 108.9853 min,

Identified with: Sequest HT (v1.17); XCorr:6.13, Percolator q-Value:0.0e0, Percolator PEP:5.3e-8, Ions matched by search engine: 0/0

Fragment match tolerance used for search: 0.6 Da

Fragments used for search: b; b-H<sub>2</sub>O; b-NH<sub>3</sub>; y; y-H<sub>2</sub>O; y-NH<sub>3</sub>

Protein references (1): Phospholipid hydroperoxide glutathione peroxidase OS=Mus musculus OX=10090 GN=Gpx4 PE=1 SV=4

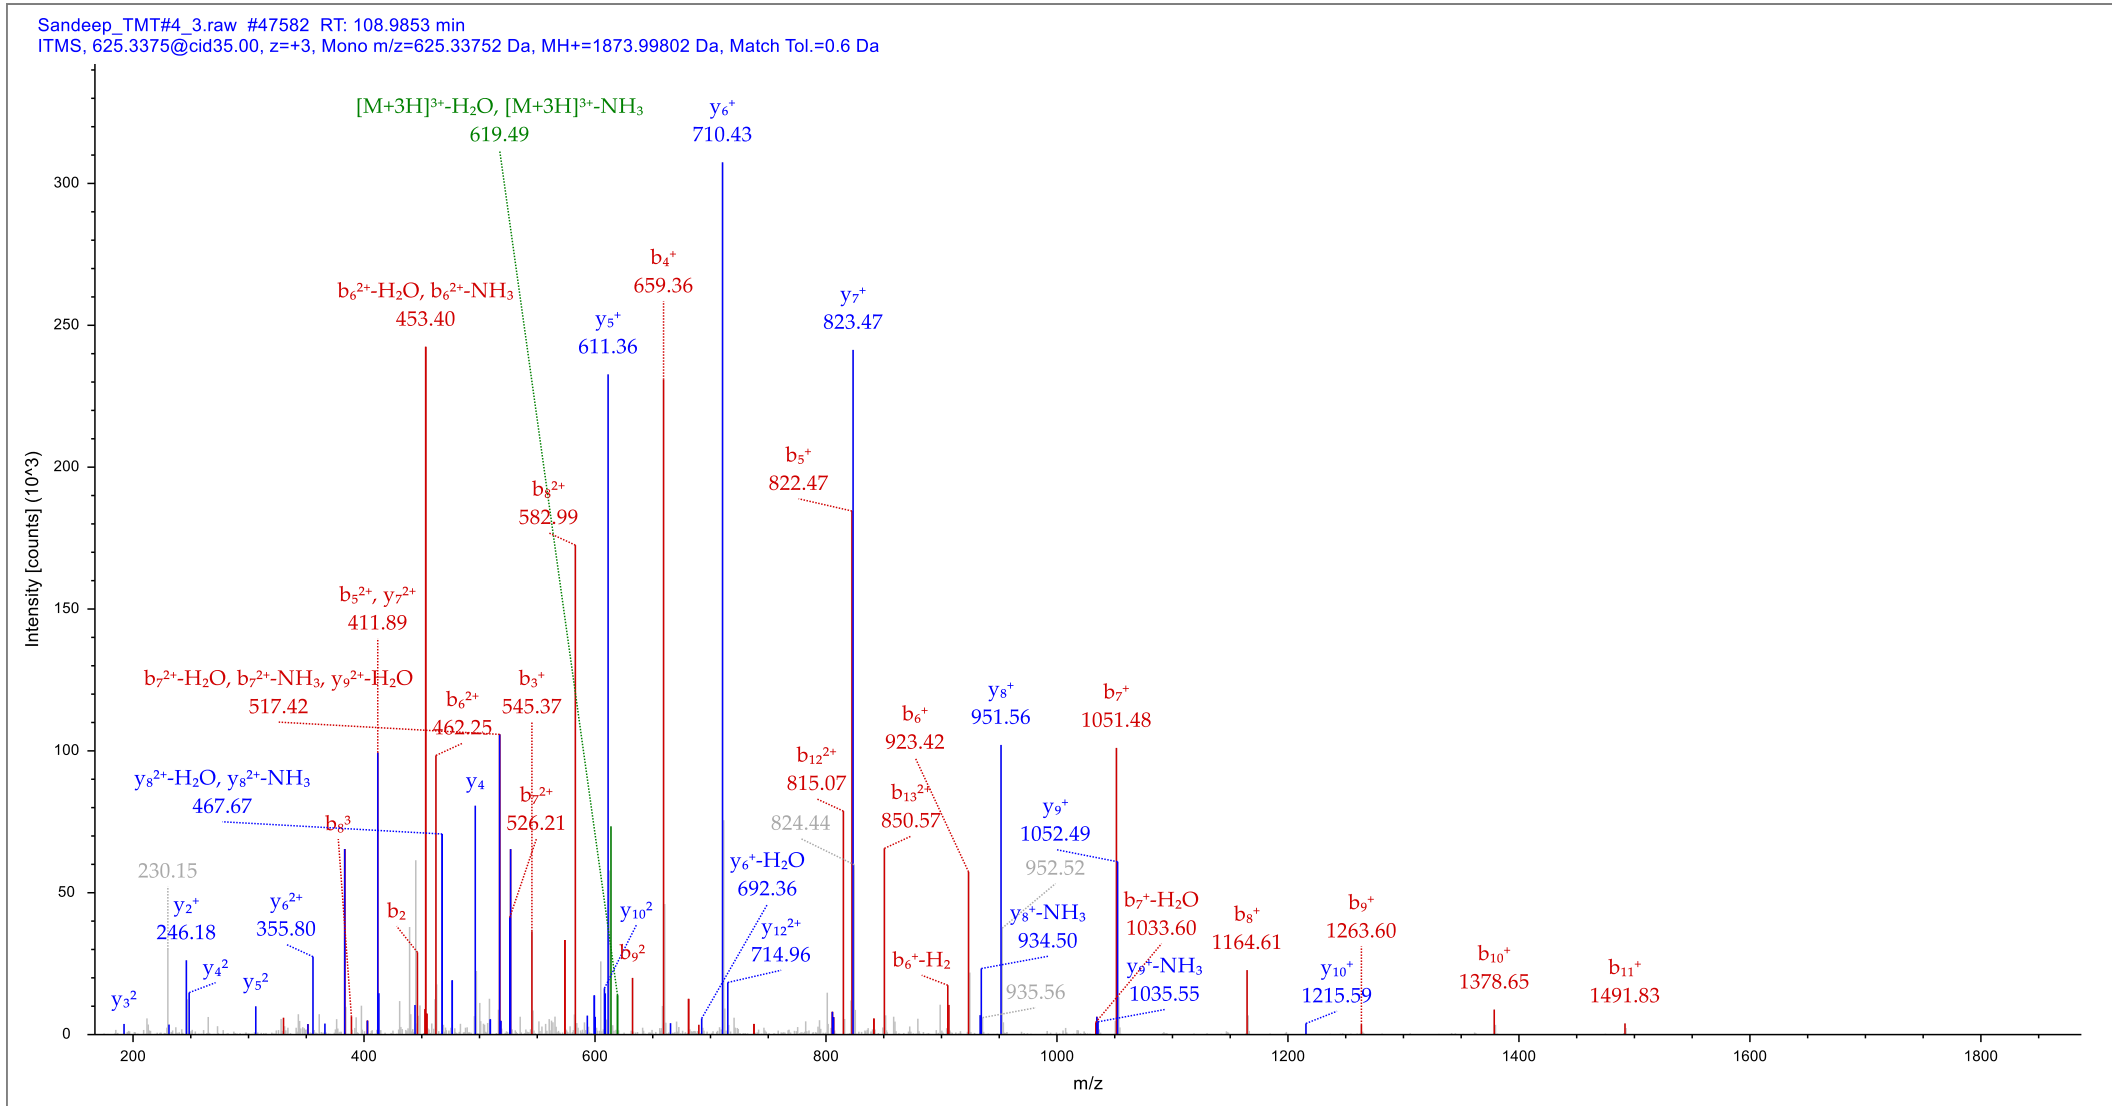



## Peptide consensus view

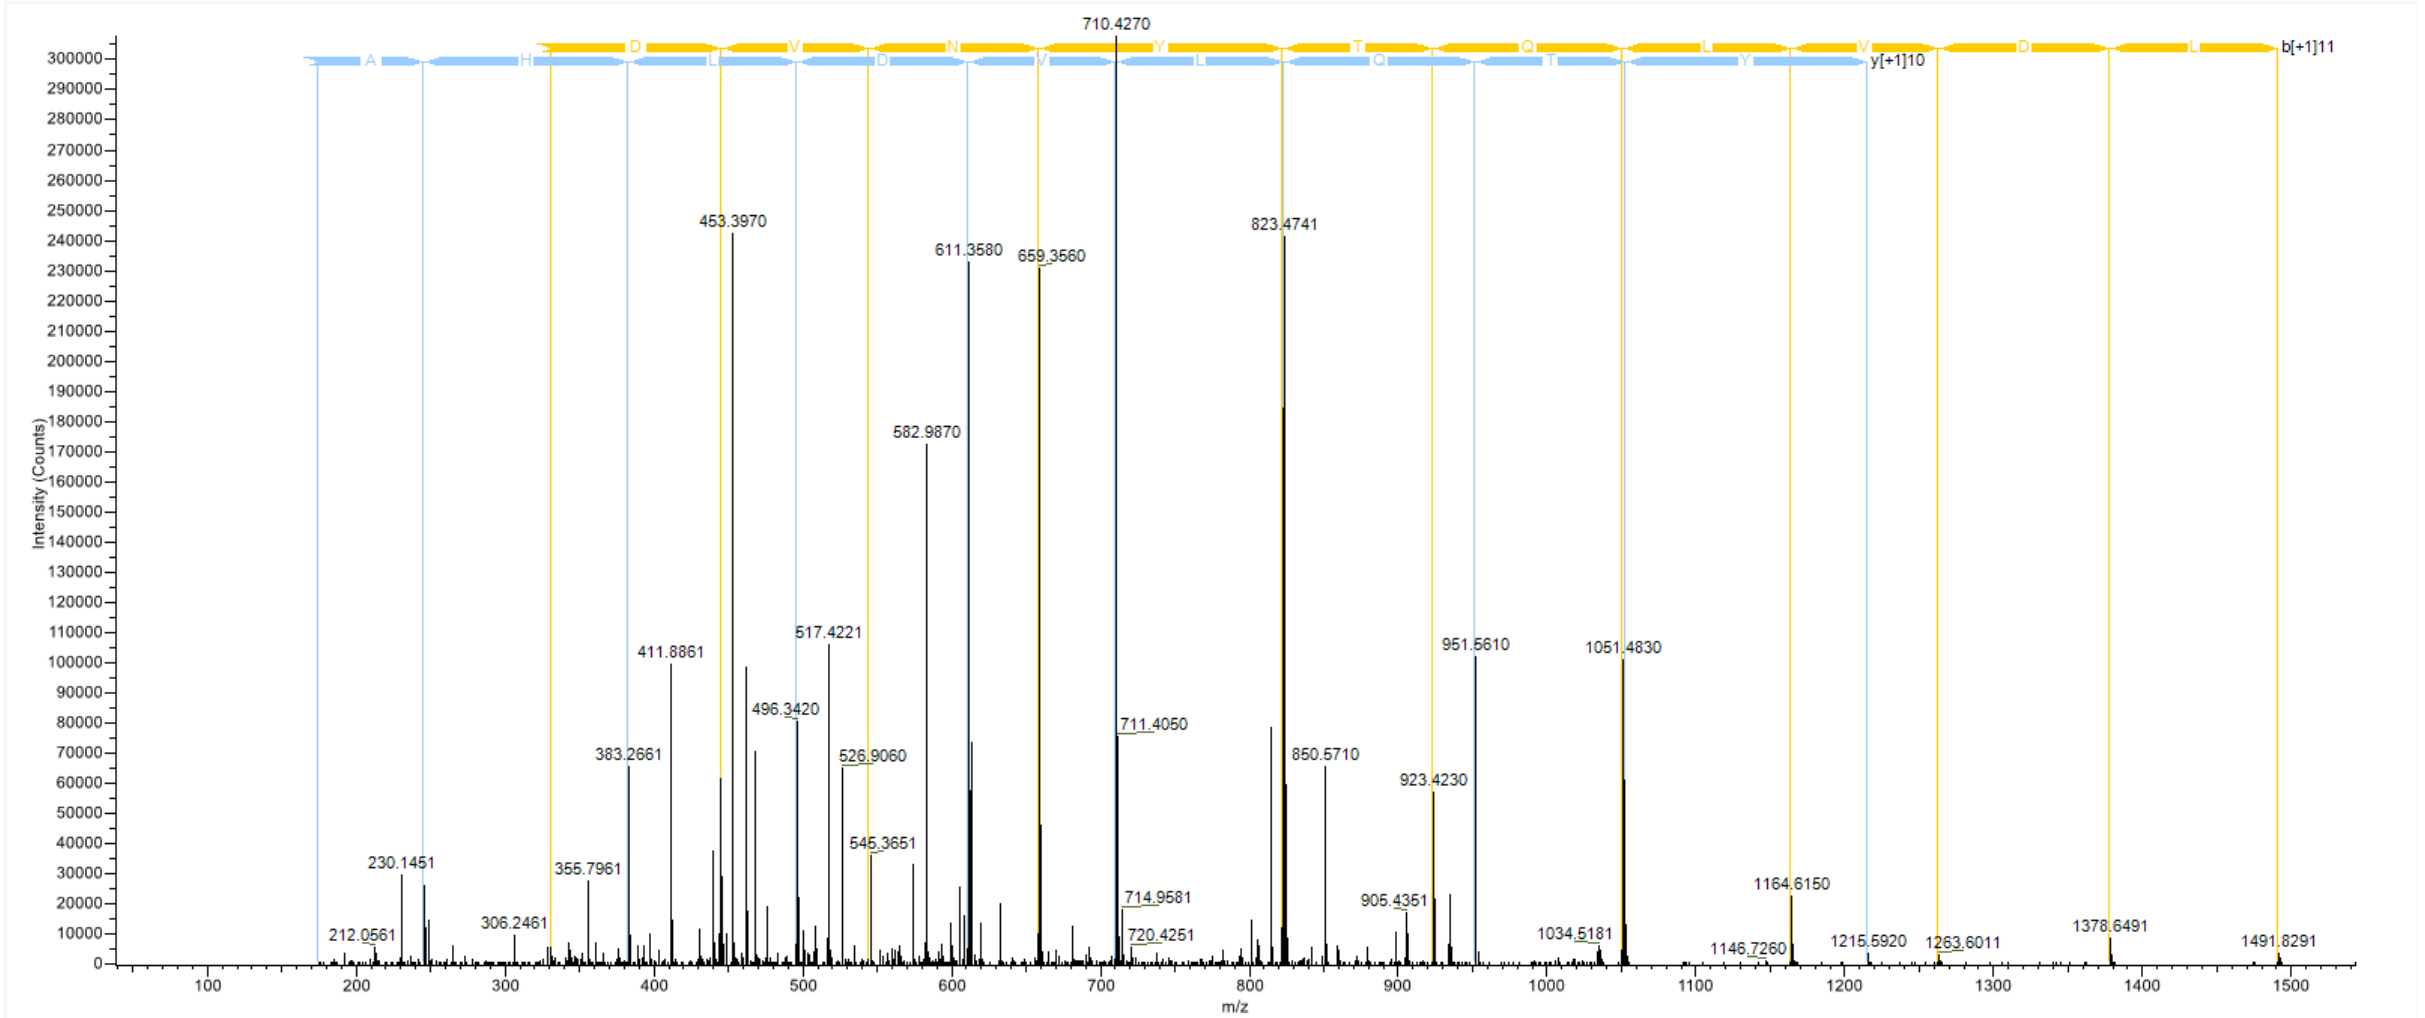

t ] D ] V ] N ] Y ] T ] Q ] L ] V ] D ] L ] H ] A ] R

Sequence: VVGFHVLGPNAGEVTQGFAAALK, K23-TMT6plex (229.16293 Da), V1-TMT6plex (229.16293 Da)  
 Charge: +3, Monoisotopic m/z: 914.18951 Da (-0.35 mmu/-0.38 ppm), MH+: 2740.55399 Da, RT: 138.0676 min,  
 Identified with: Sequest HT (v1.17); XCorr:7.40, Percolator q-Value:0.0e0, Percolator PEP:6.2e-9, Ions matched by search engine: 0/0  
 Fragment match tolerance used for search: 0.6 Da  
 Fragments used for search: b; b-H<sub>2</sub>O; b-NH<sub>3</sub>; y; y-H<sub>2</sub>O; y-NH<sub>3</sub>  
 Protein references (1): Thioredoxin reductase 1, cytoplasmic OS=Mus musculus OX=10090 GN=Txnrd1 PE=1 SV=3

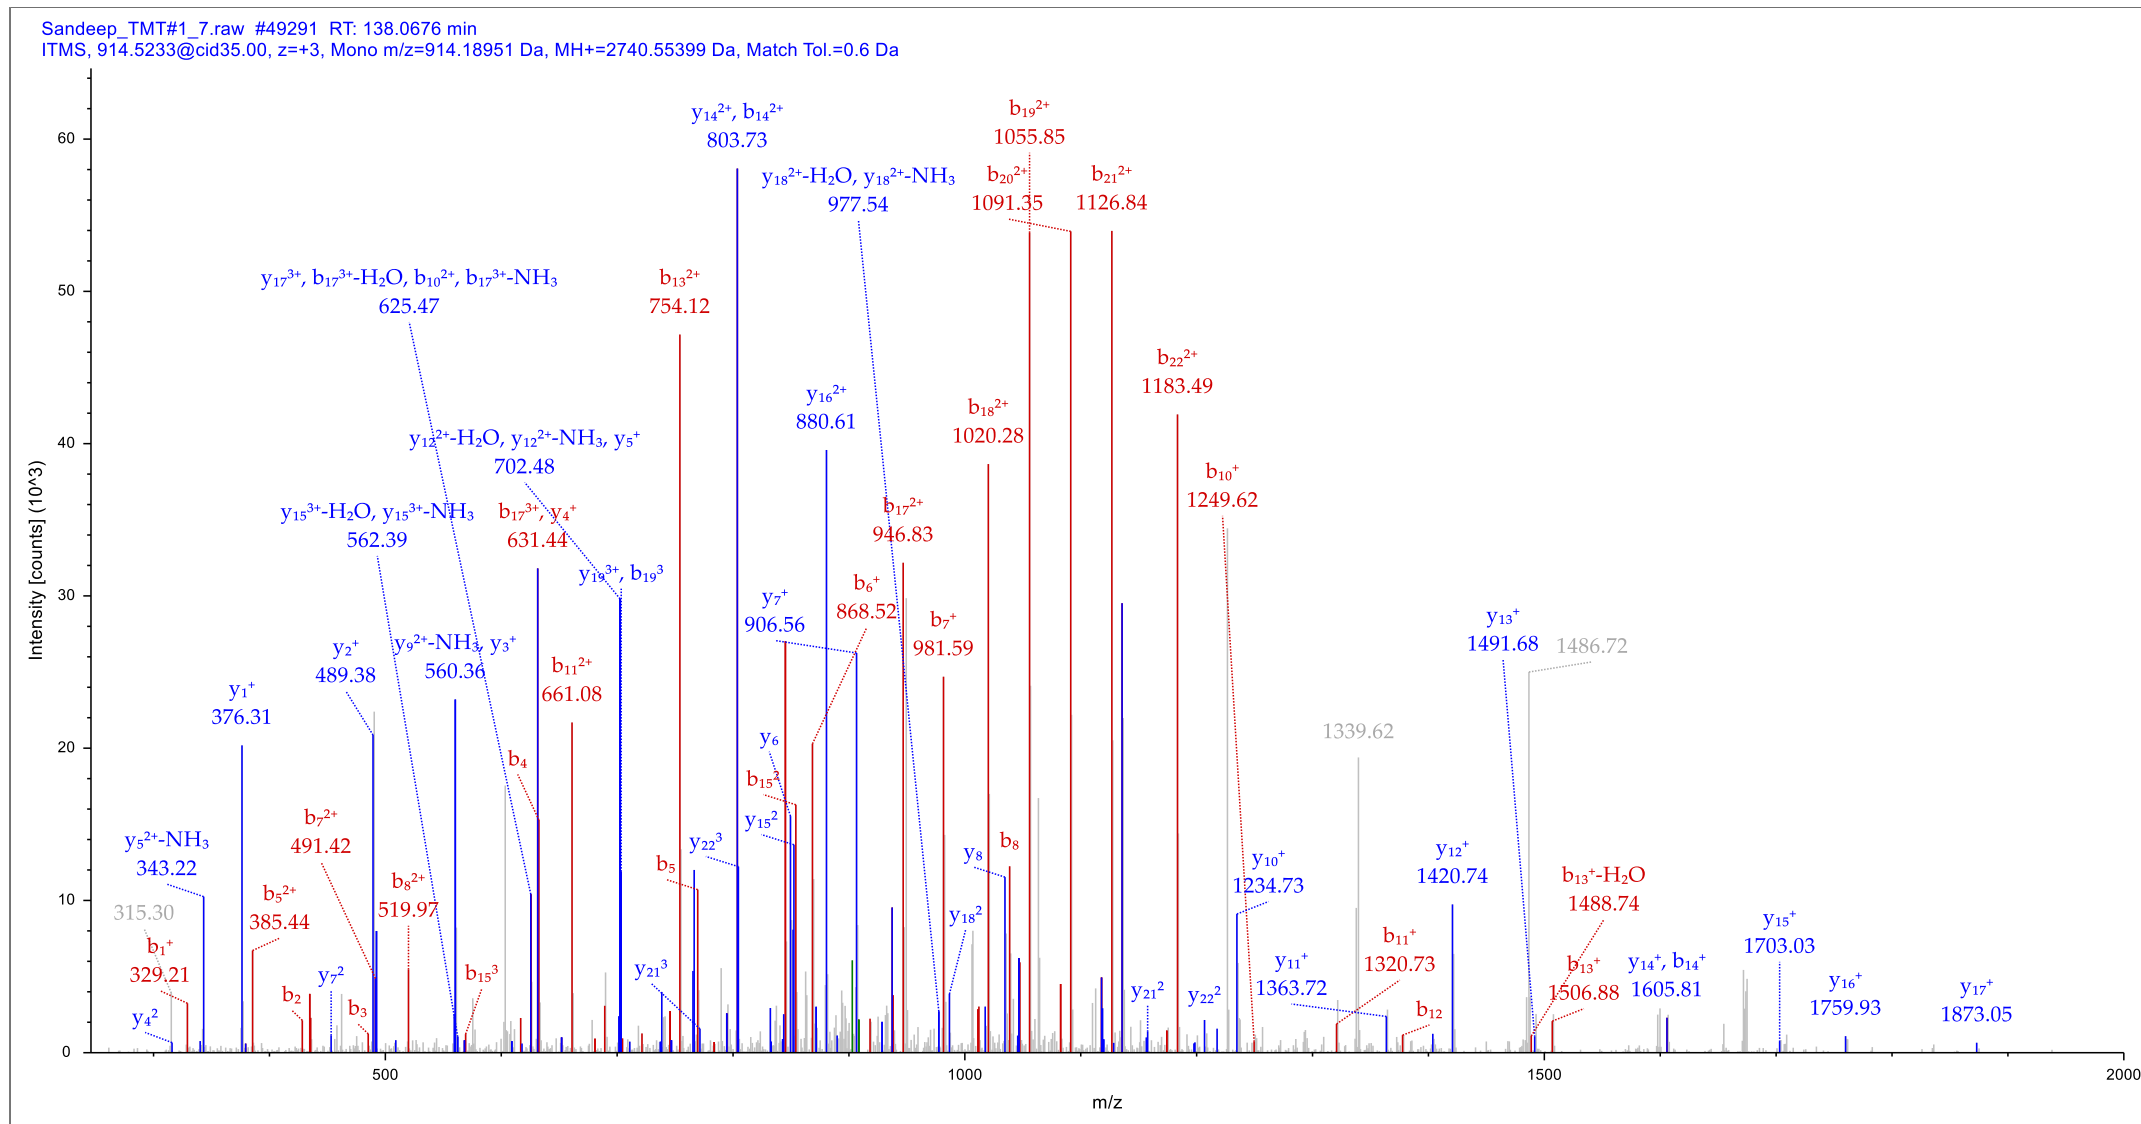

## Peptide consensus view

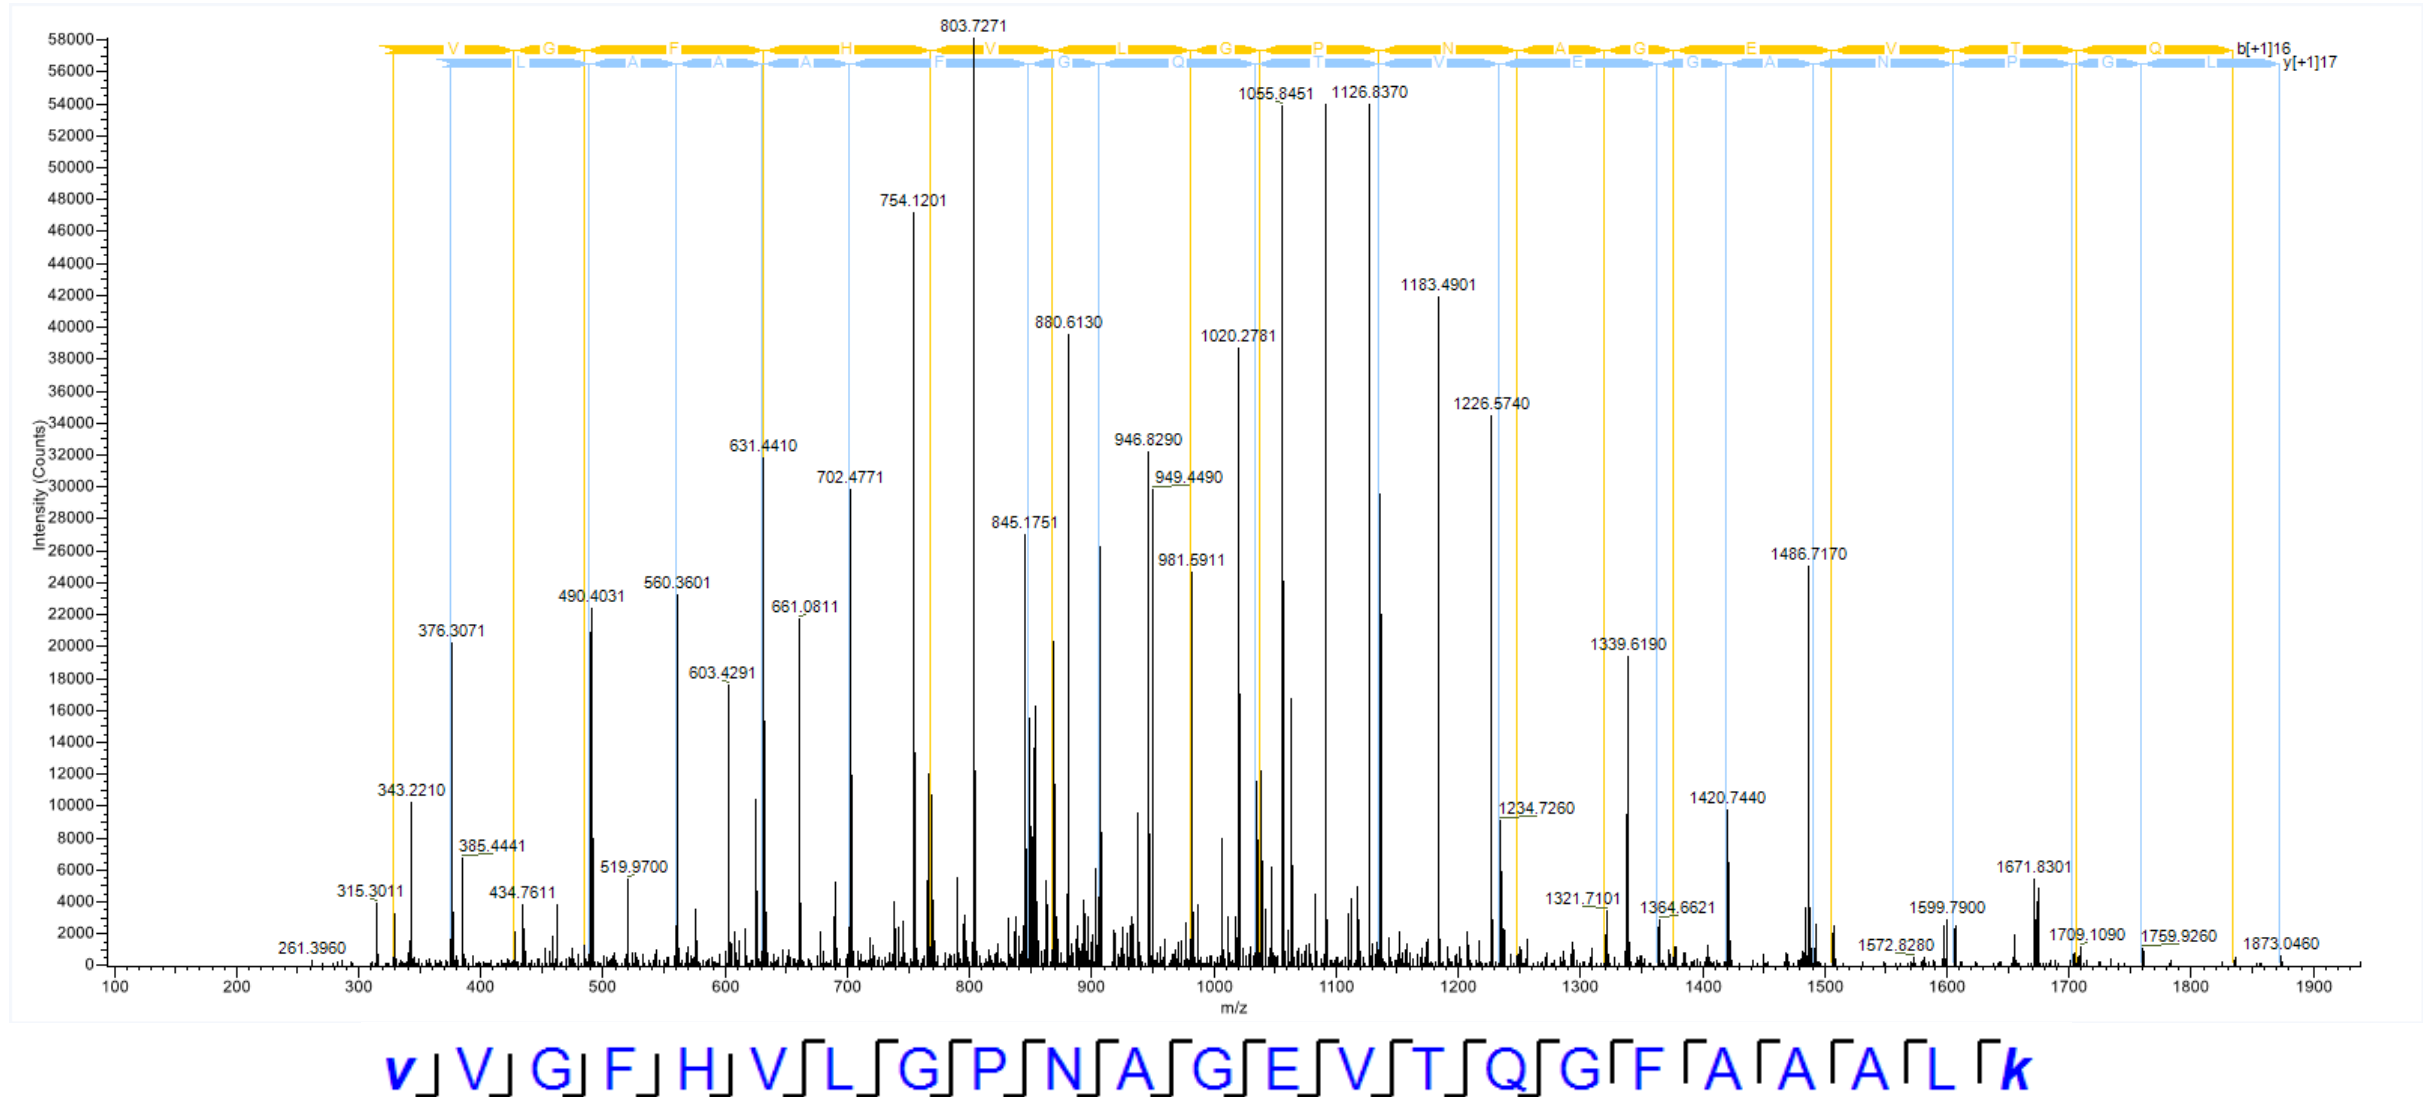

Sequence: VTAQSTNSEETIEGFNTVLLAVGR, V1-TMT6plex (229.16293 Da)

Charge: +3, Monoisotopic m/z: 965.50446 Da (+1.45 mmu/+1.5 ppm), MH+: 2894.49881 Da, RT: 141.7110 min,

Identified with: Sequest HT (v1.17); XCorr:6.68, Percolator q-Value:0.0e0, Percolator PEP:8.8e-7, Ions matched by search engine: 0/0

Fragment match tolerance used for search: 0.6 Da

Fragments used for search: b; b-H<sub>2</sub>O; b-NH<sub>3</sub>; y; y-H<sub>2</sub>O; y-NH<sub>3</sub>

Protein references (1): Thioredoxin reductase 1, cytoplasmic OS=Mus musculus OX=10090 GN=Txnrd1 PE=1 SV=3

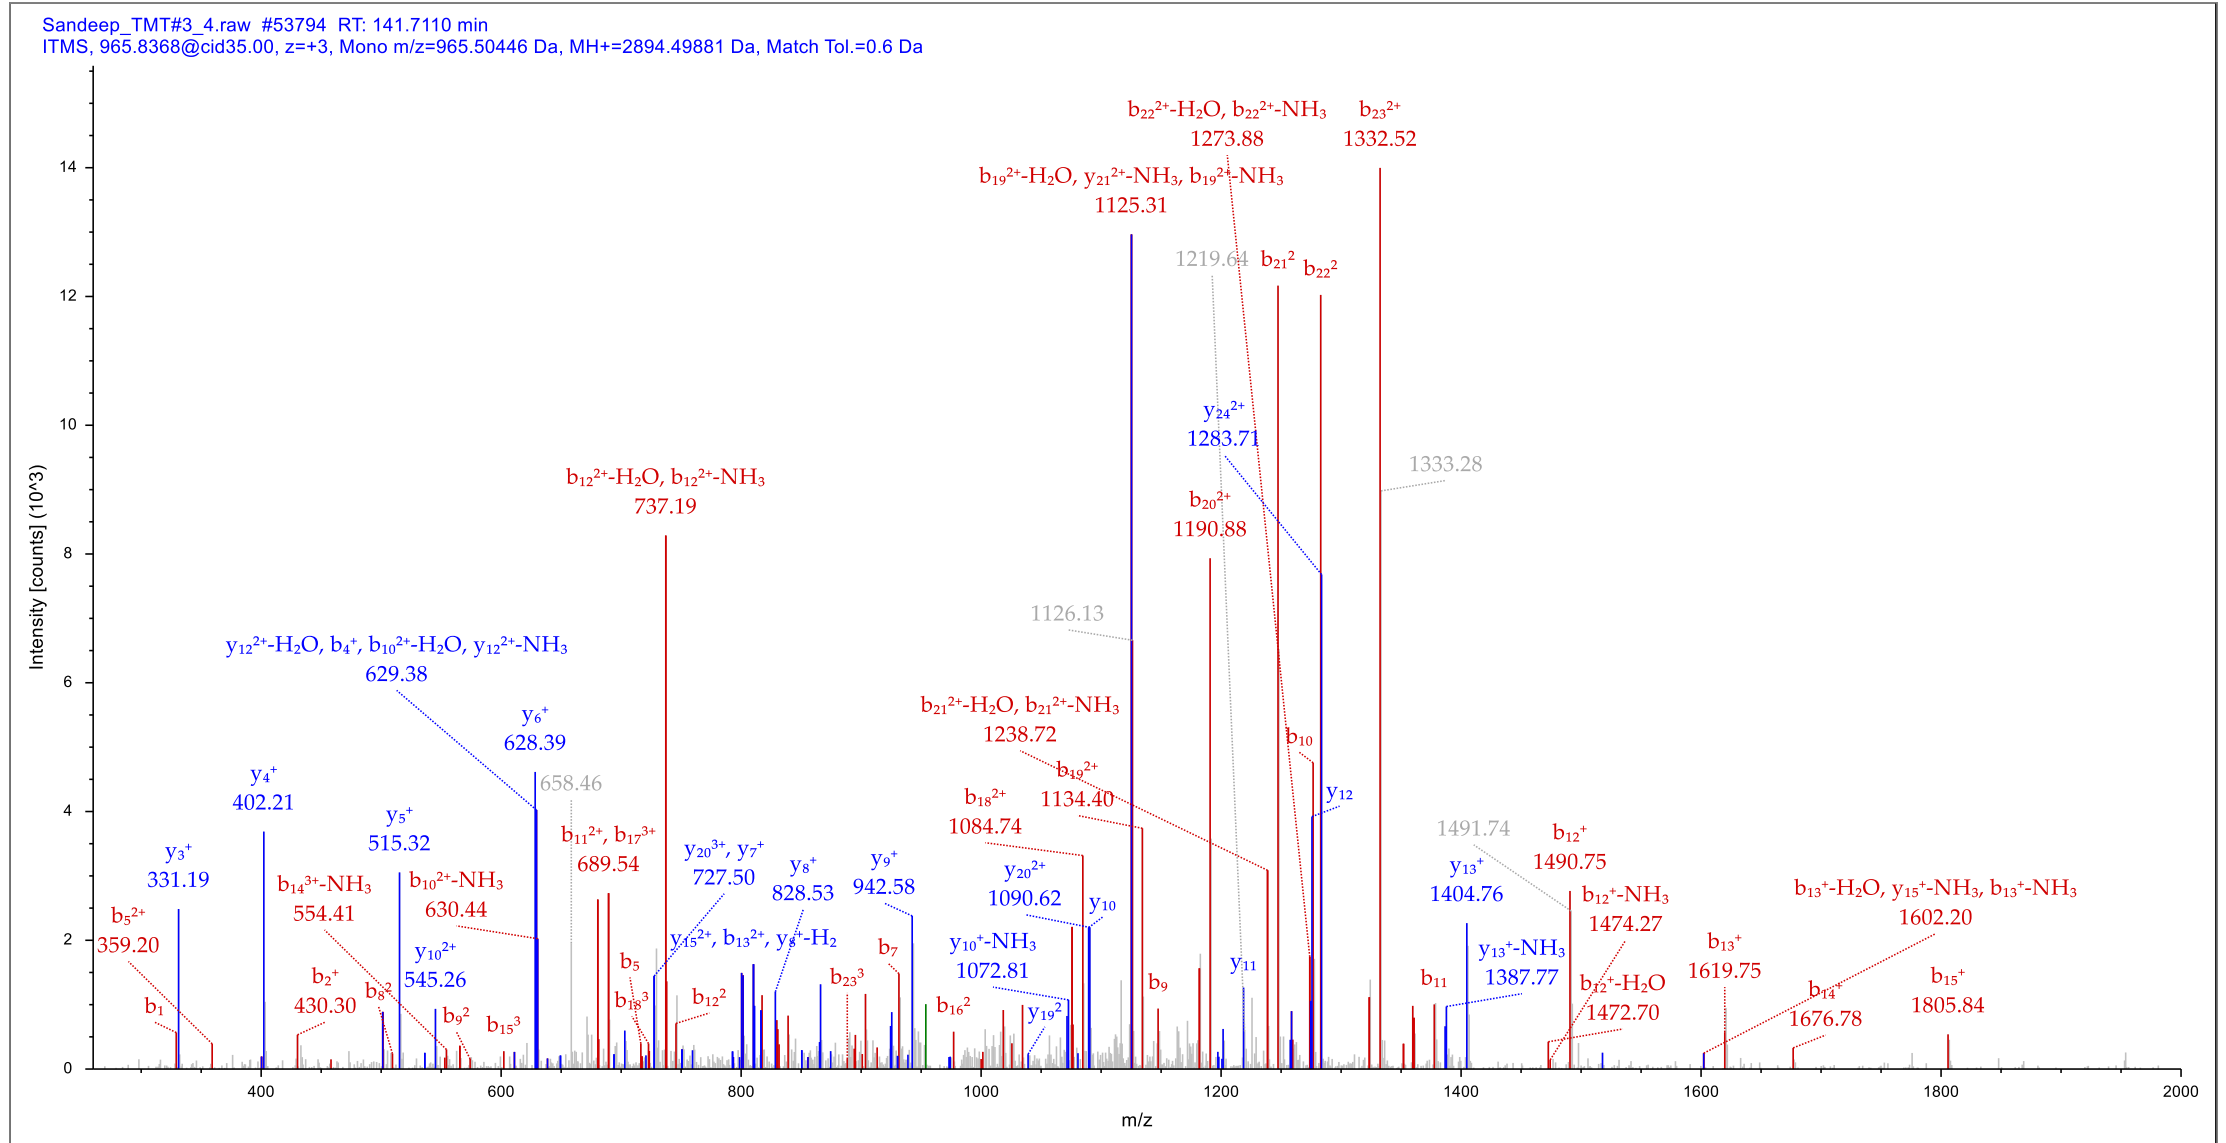

# Peptide consensus view

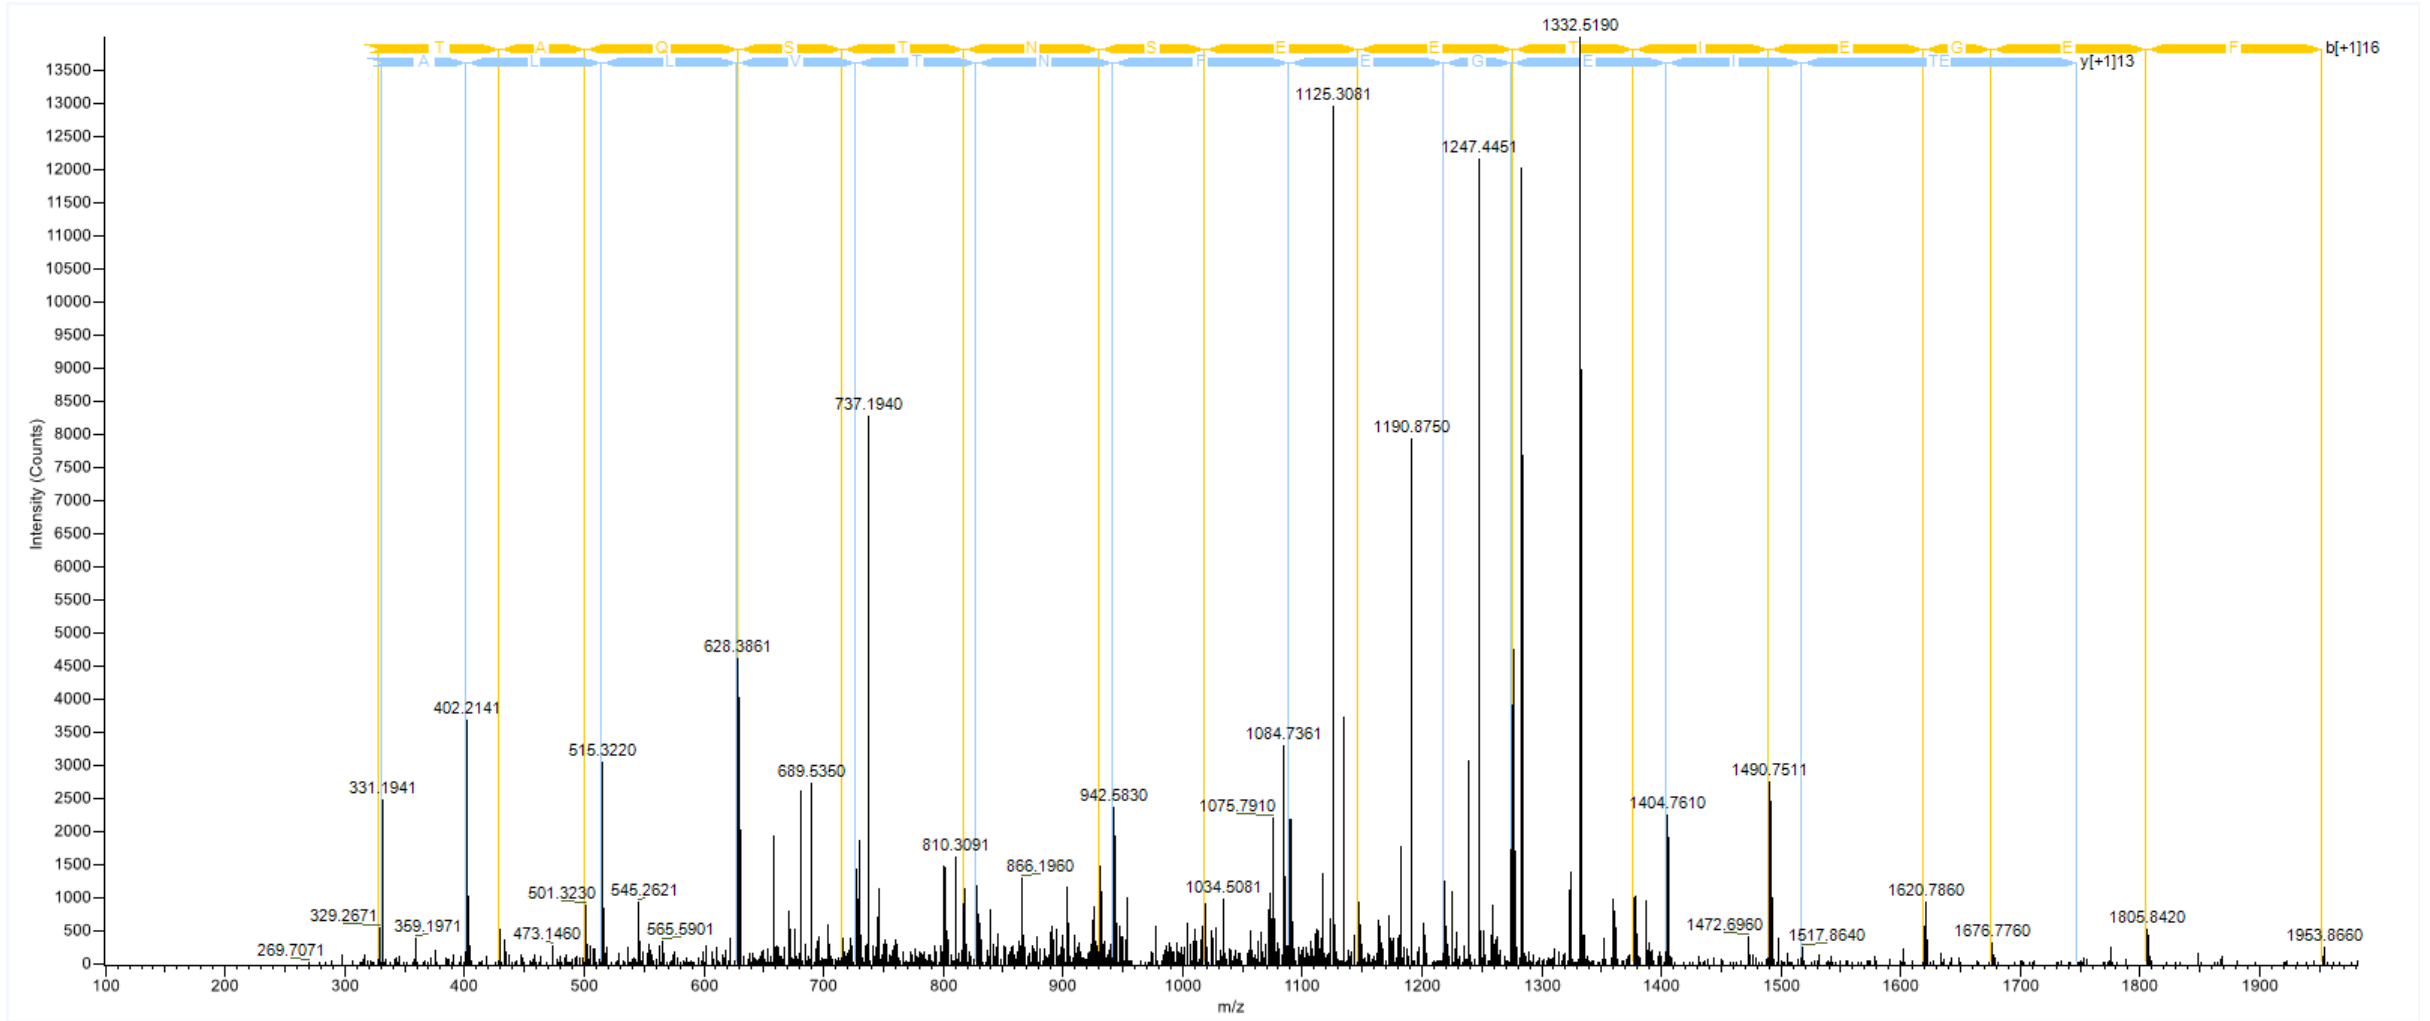

V T A Q S T N S E E T I E G E F N T V L L A V G R

Sequence: VAVADYVEPSR, V1-TMT6plex (229.16293 Da)

Charge: +2, Monoisotopic m/z: 766.42004 Da (+0.52 mmu/+0.68 ppm), MH+: 1531.83281 Da, RT: 100.6961 min,

Identified with: Sequest HT (v1.17); XCorr:3.99, Percolator q-Value:5.9e-5, Percolator PEP:8.9e-5, Ions matched by search engine: 0/0

Fragment match tolerance used for search: 0.6 Da

Fragments used for search: b; b-H<sub>2</sub>O; y; y-H<sub>2</sub>O; y-NH<sub>3</sub>

Protein references (1): Thioredoxin reductase 2, mitochondrial OS=Mus musculus OX=10090 GN=Txnrd2 PE=1 SV=4

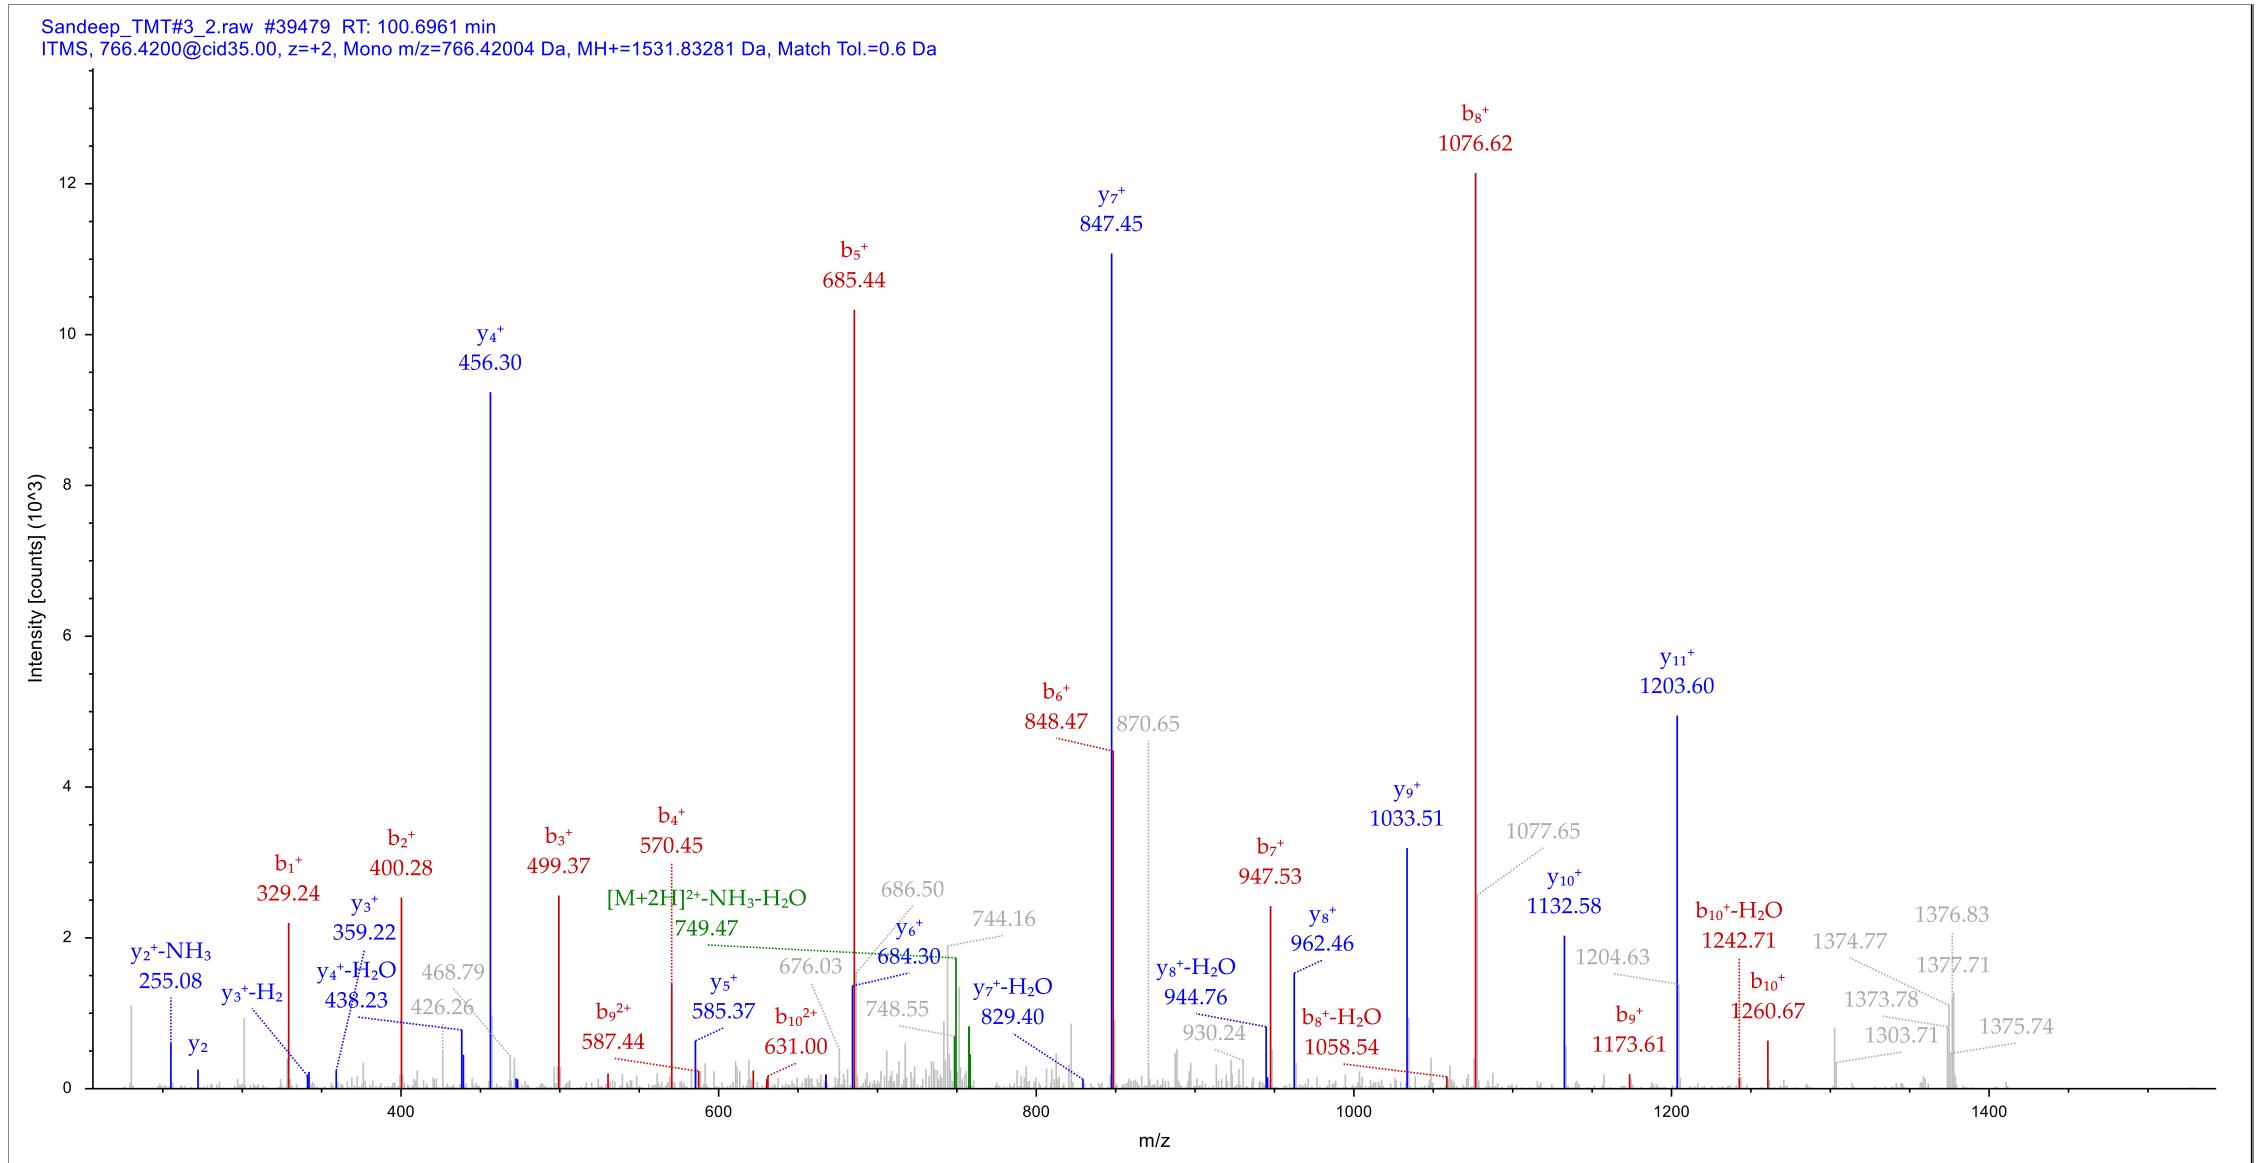

## Peptide consensus view

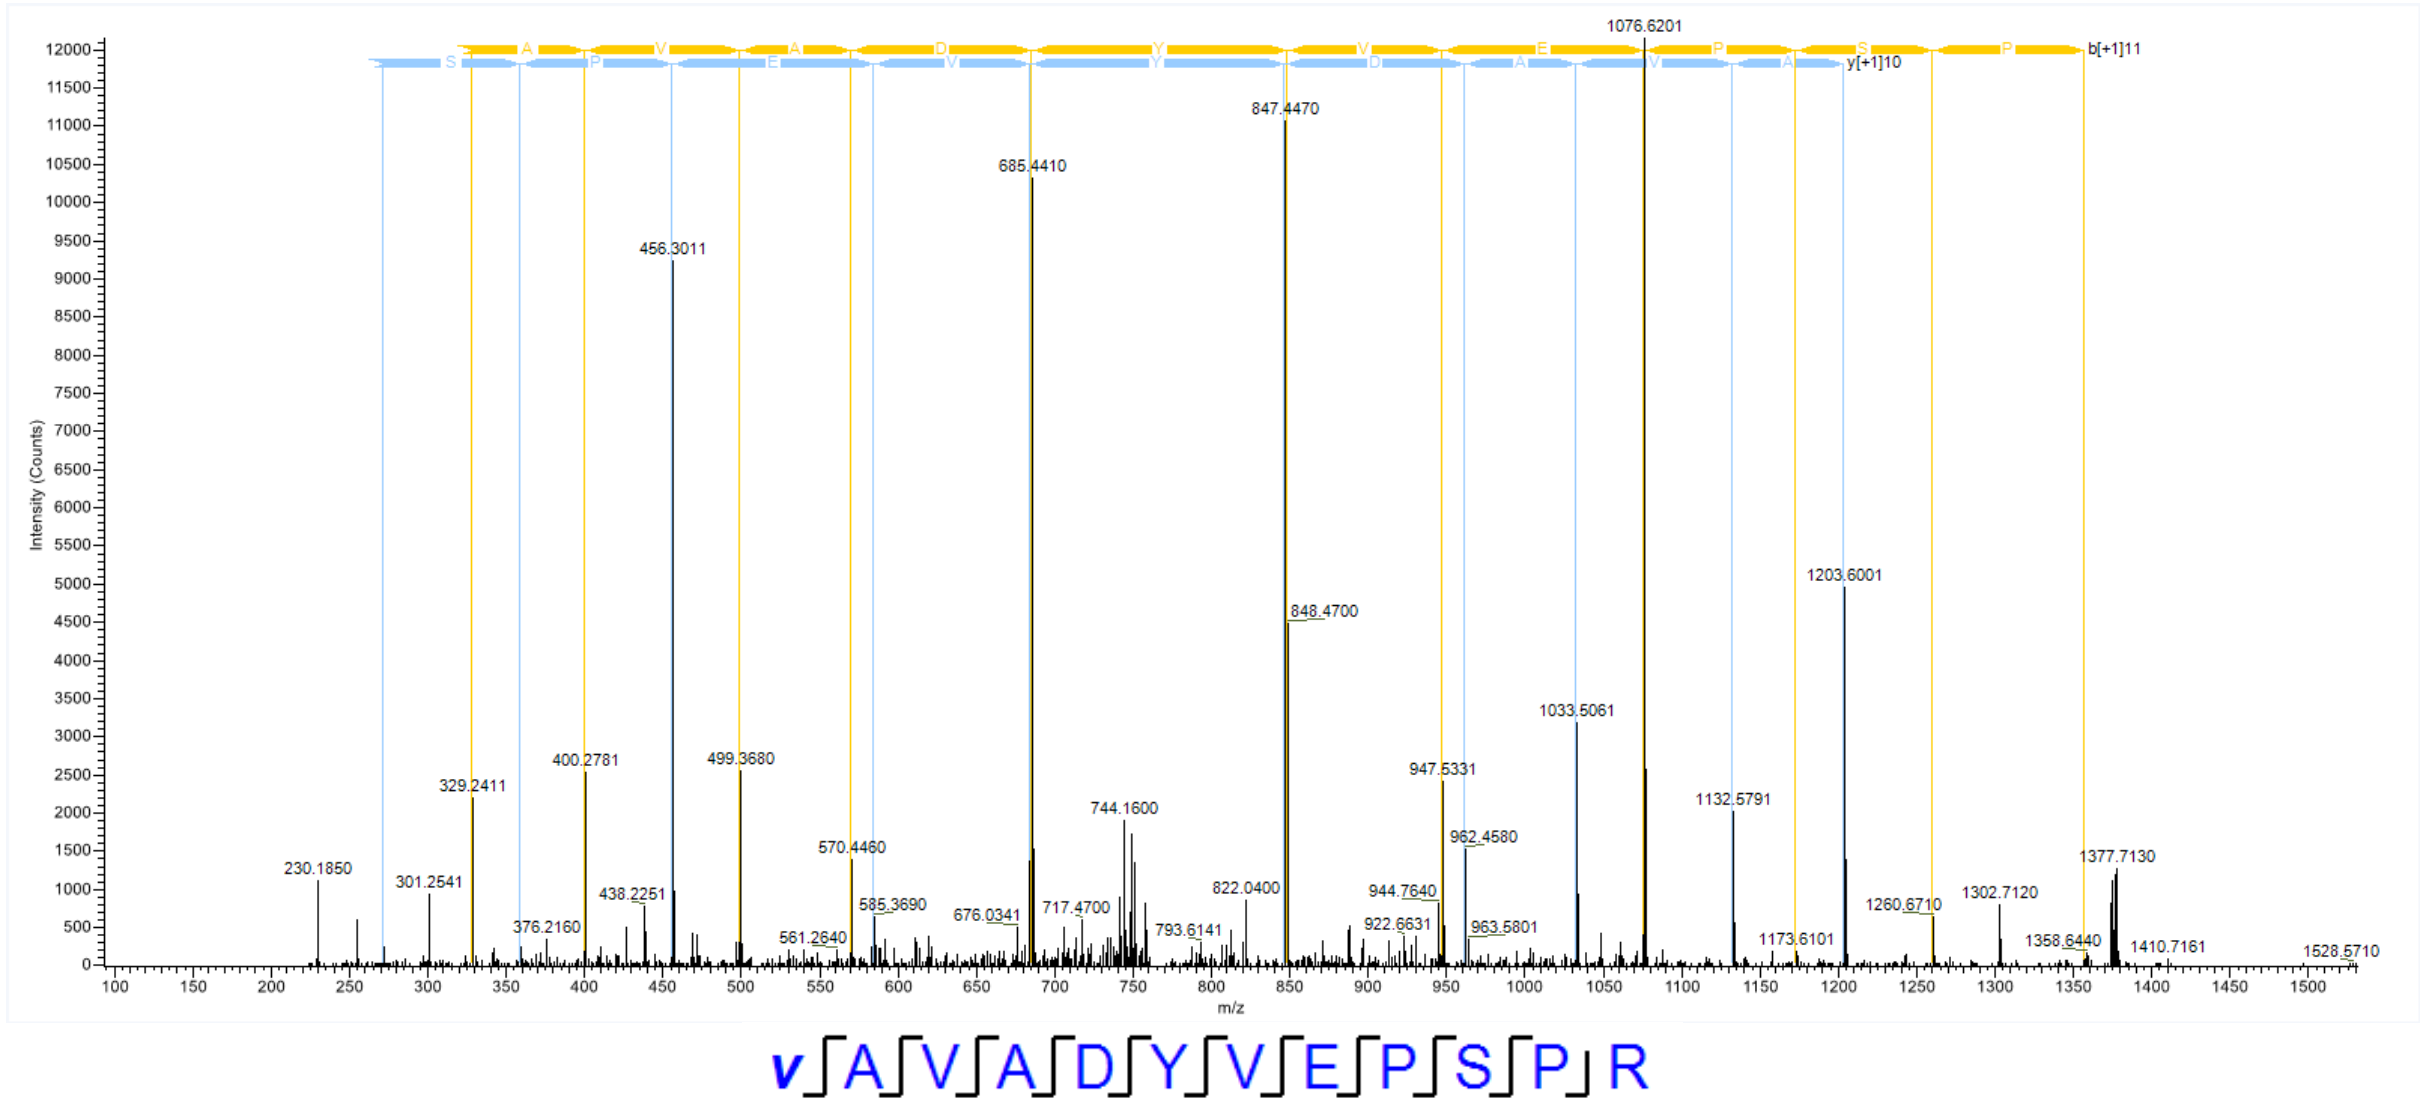

Sequence: ASFVDEHTVR, A1-TMT6plex (229.16293 Da)

Charge: +3, Monoisotopic m/z: 463.91553 Da (-0.12 mmu/-0.26 ppm), MH+: 1389.73203 Da, RT: 73.6127 min,

Identified with: Sequest HT (v1.17); XCorr:3.74, Percolator q-Value:4.7e-5, Percolator PEP:1.7e-4, Ions matched by search engine: 0/0

Fragment match tolerance used for search: 0.6 Da

Fragments used for search: b; b-H<sub>2</sub>O; y; y-H<sub>2</sub>O; y-NH<sub>3</sub>

Protein references (1): - Thioredoxin reductase 2, mitochondrial OS=Mus musculus OX=10090 GN=Txnrd2 PE=1 SV=4

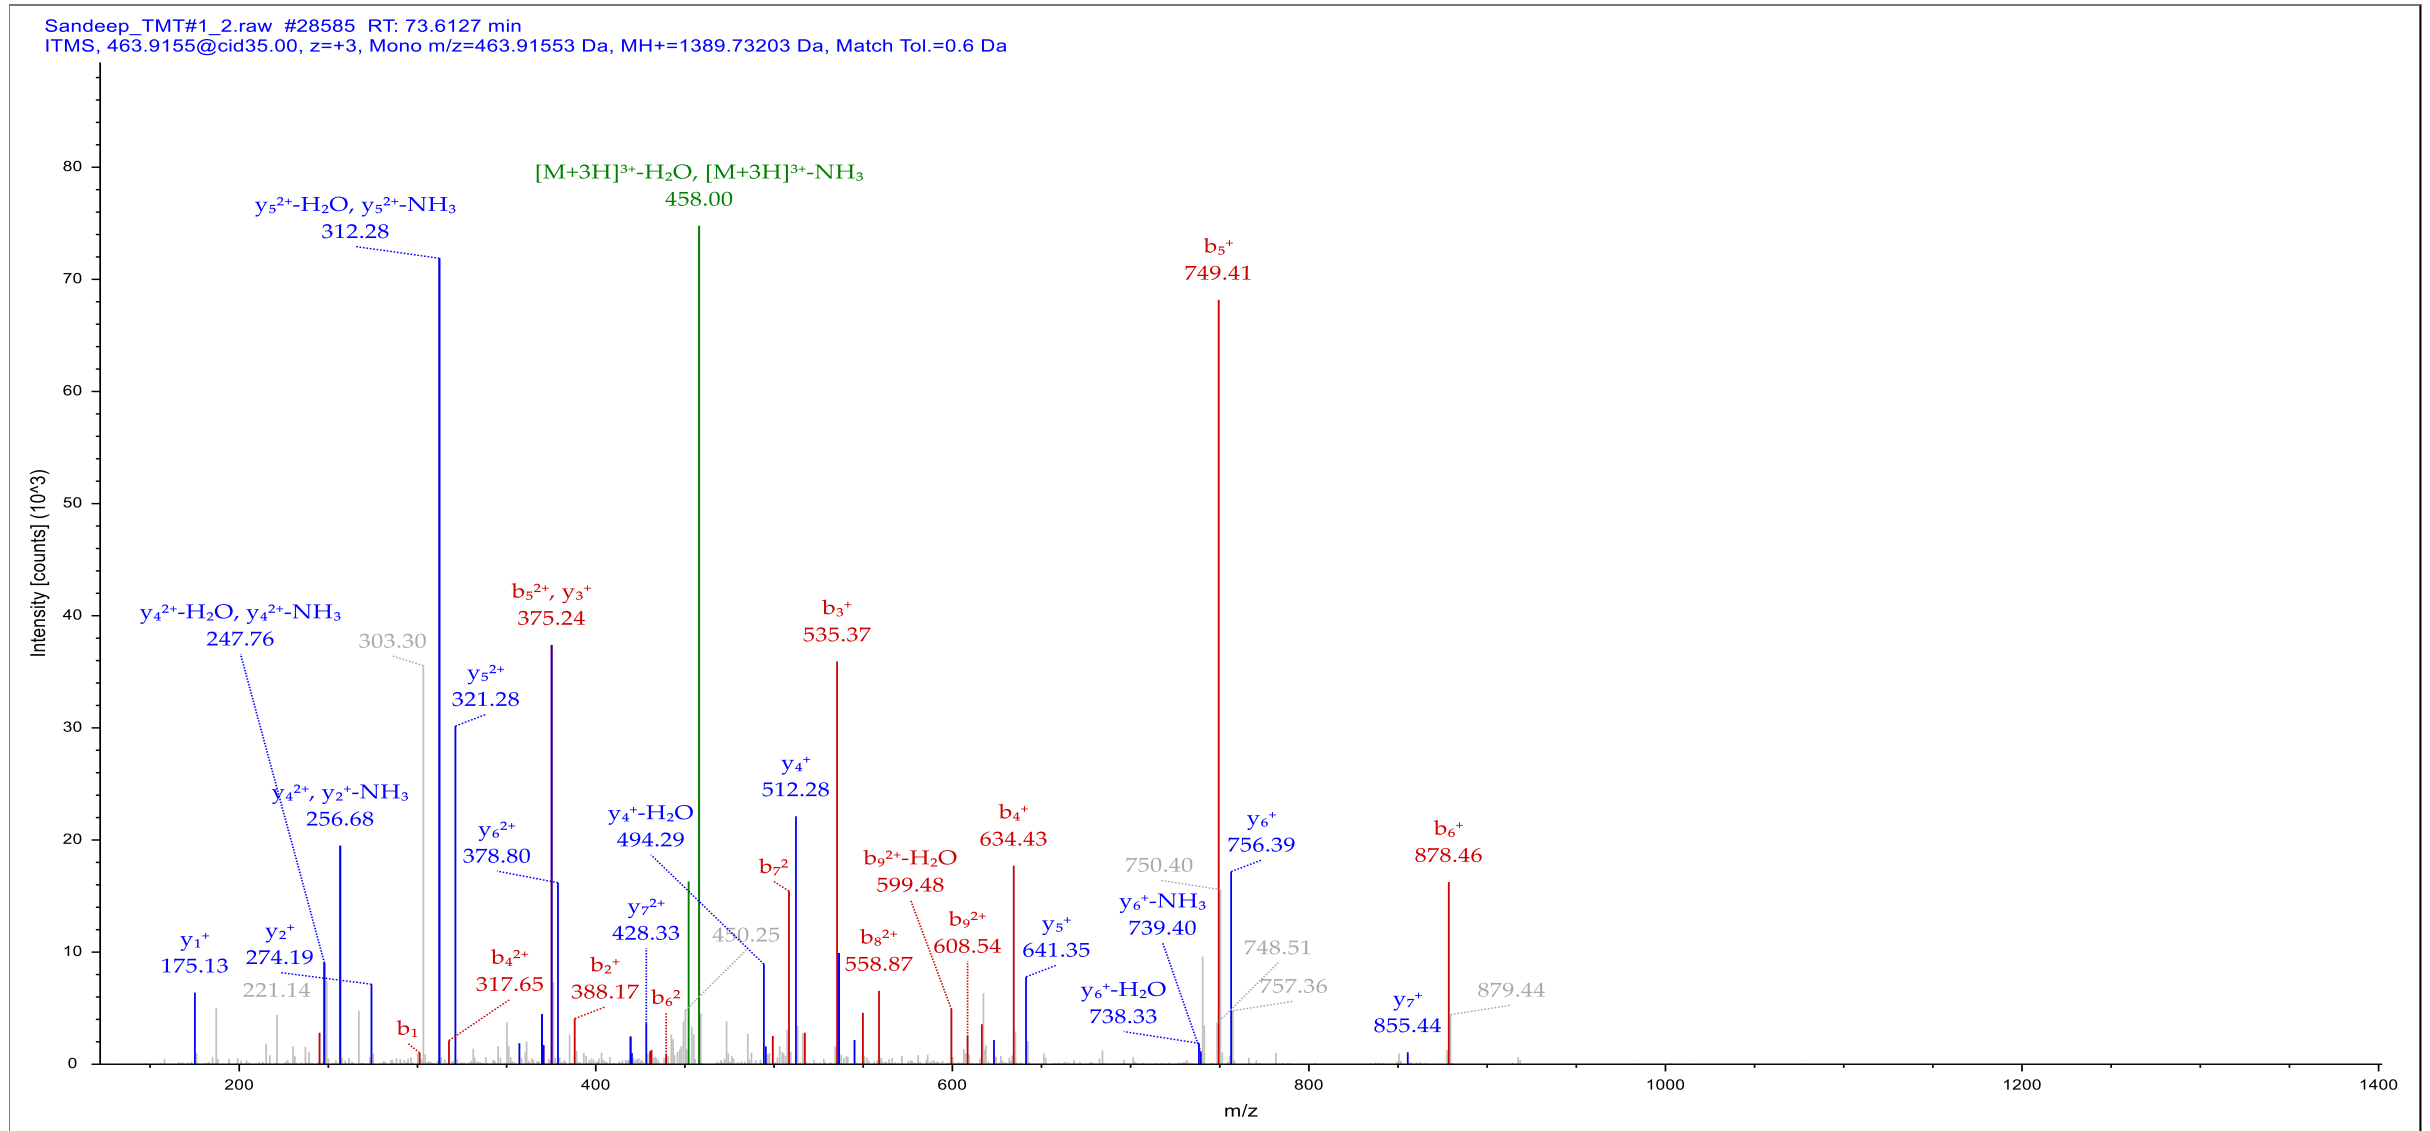



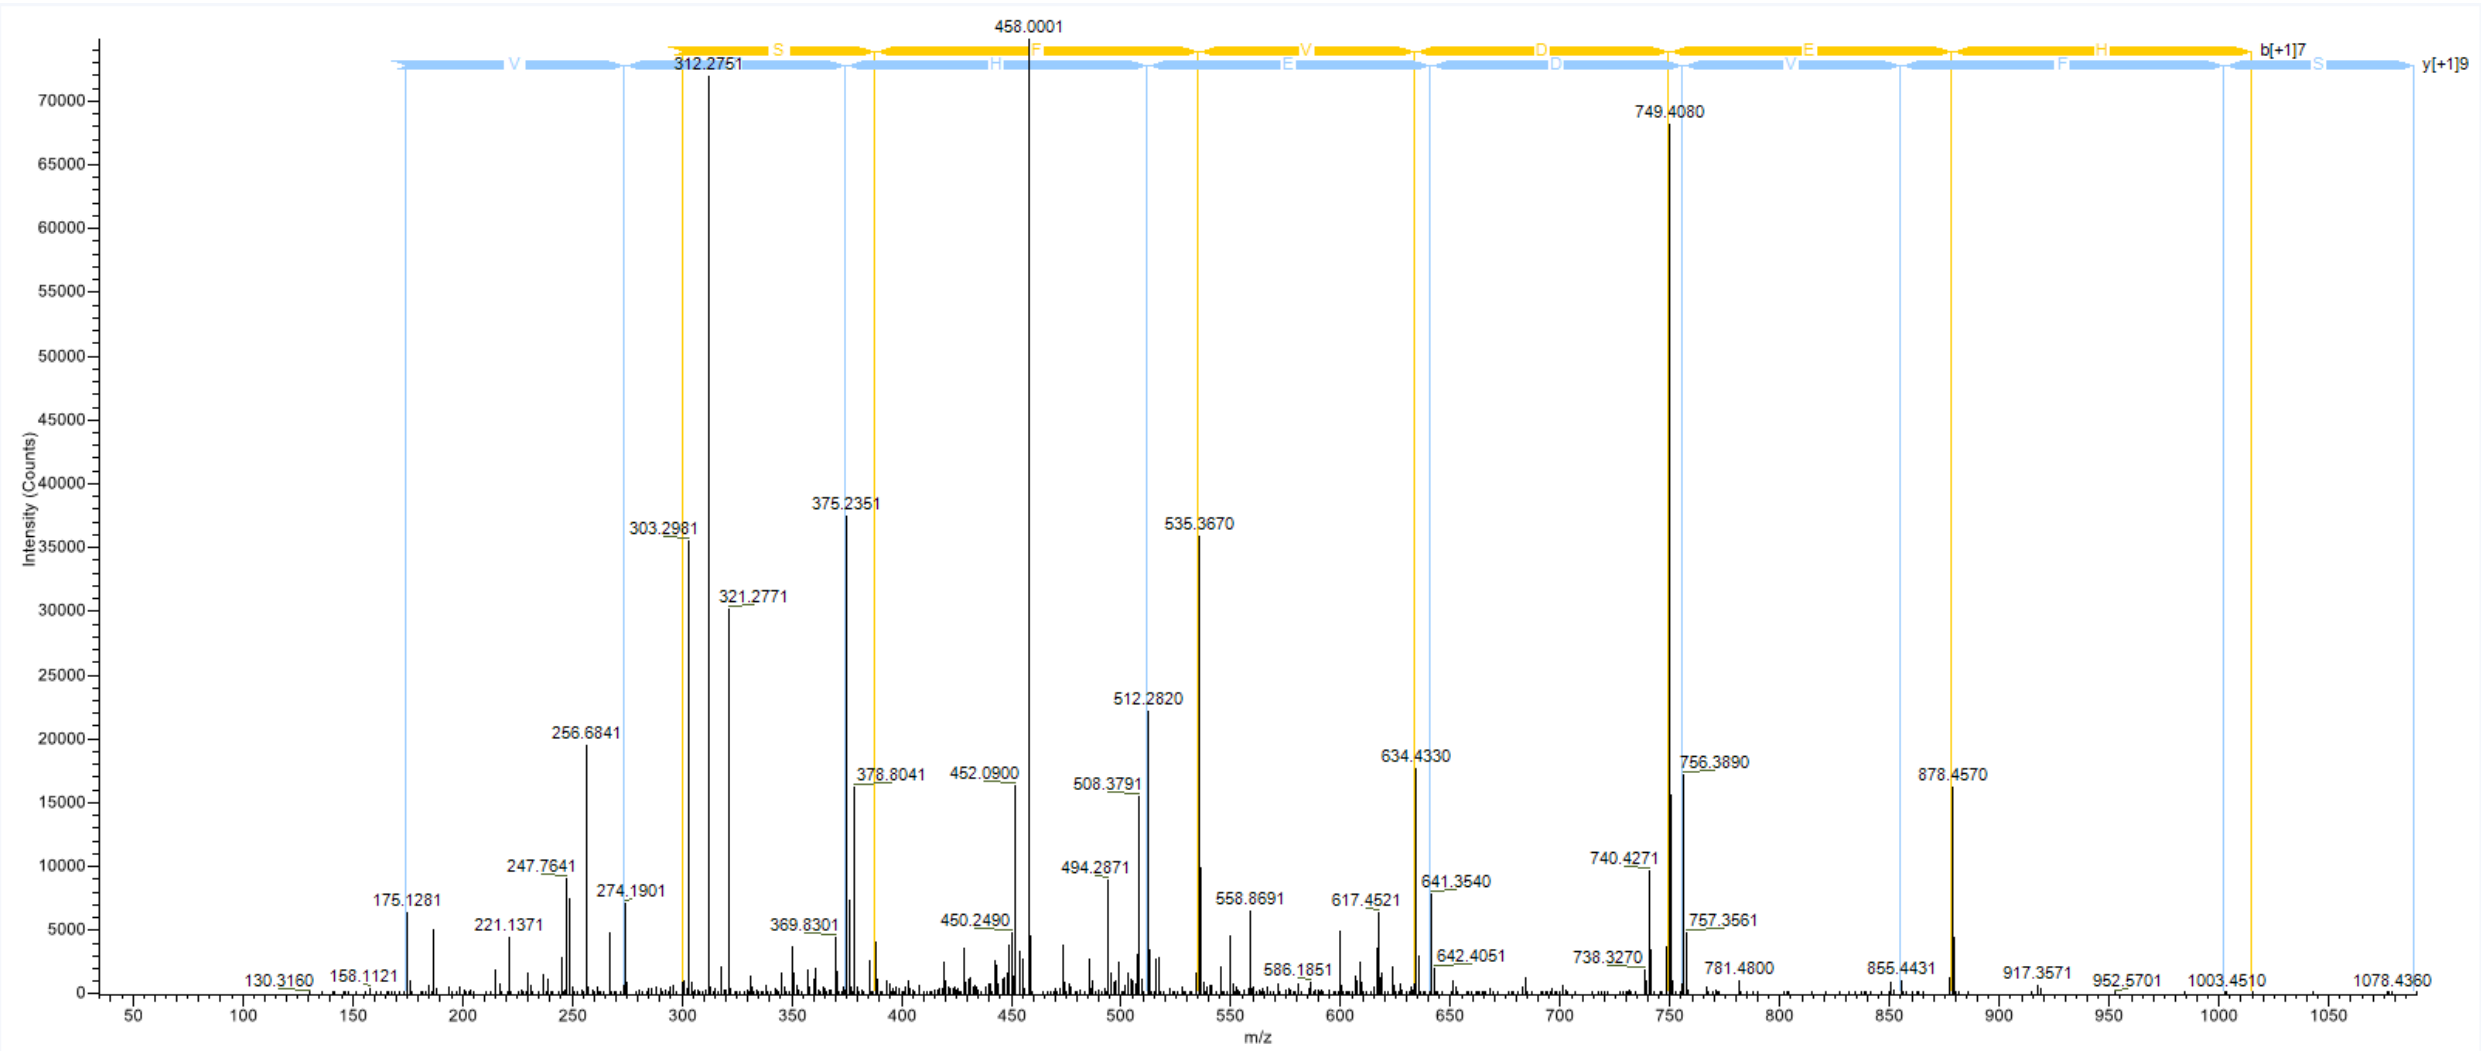

**a** [S] [F] [V] [D] [E] [H] [T] [V] [R]

Sequence: NRPEALK, K7-TMT6plex (229.16293 Da), N1-TMT6plex (229.16293 Da)  
Charge: +3, Monoisotopic m/z: 429.27069 Da (-0.57 mmu/-1.34 ppm), MH+: 1285.79752 Da, RT: 56.7641 min,  
Identified with: Sequest HT (v1.17); XCorr:2.87, Percolator q-Value:1.6e-3, Percolator PEP:1.4e-2, Ions matched by search engine: 0/0  
Fragment match tolerance used for search: 0.6 Da  
Fragments used for search: b; b-H<sub>2</sub>O; b-NH<sub>3</sub>; y; y-H<sub>2</sub>O; y-NH<sub>3</sub>  
Protein references (1): Methionine-R-sulfoxide reductase B1 OS=Mus musculus OX=10090 GN=Msrb1 PE=1 SV=3

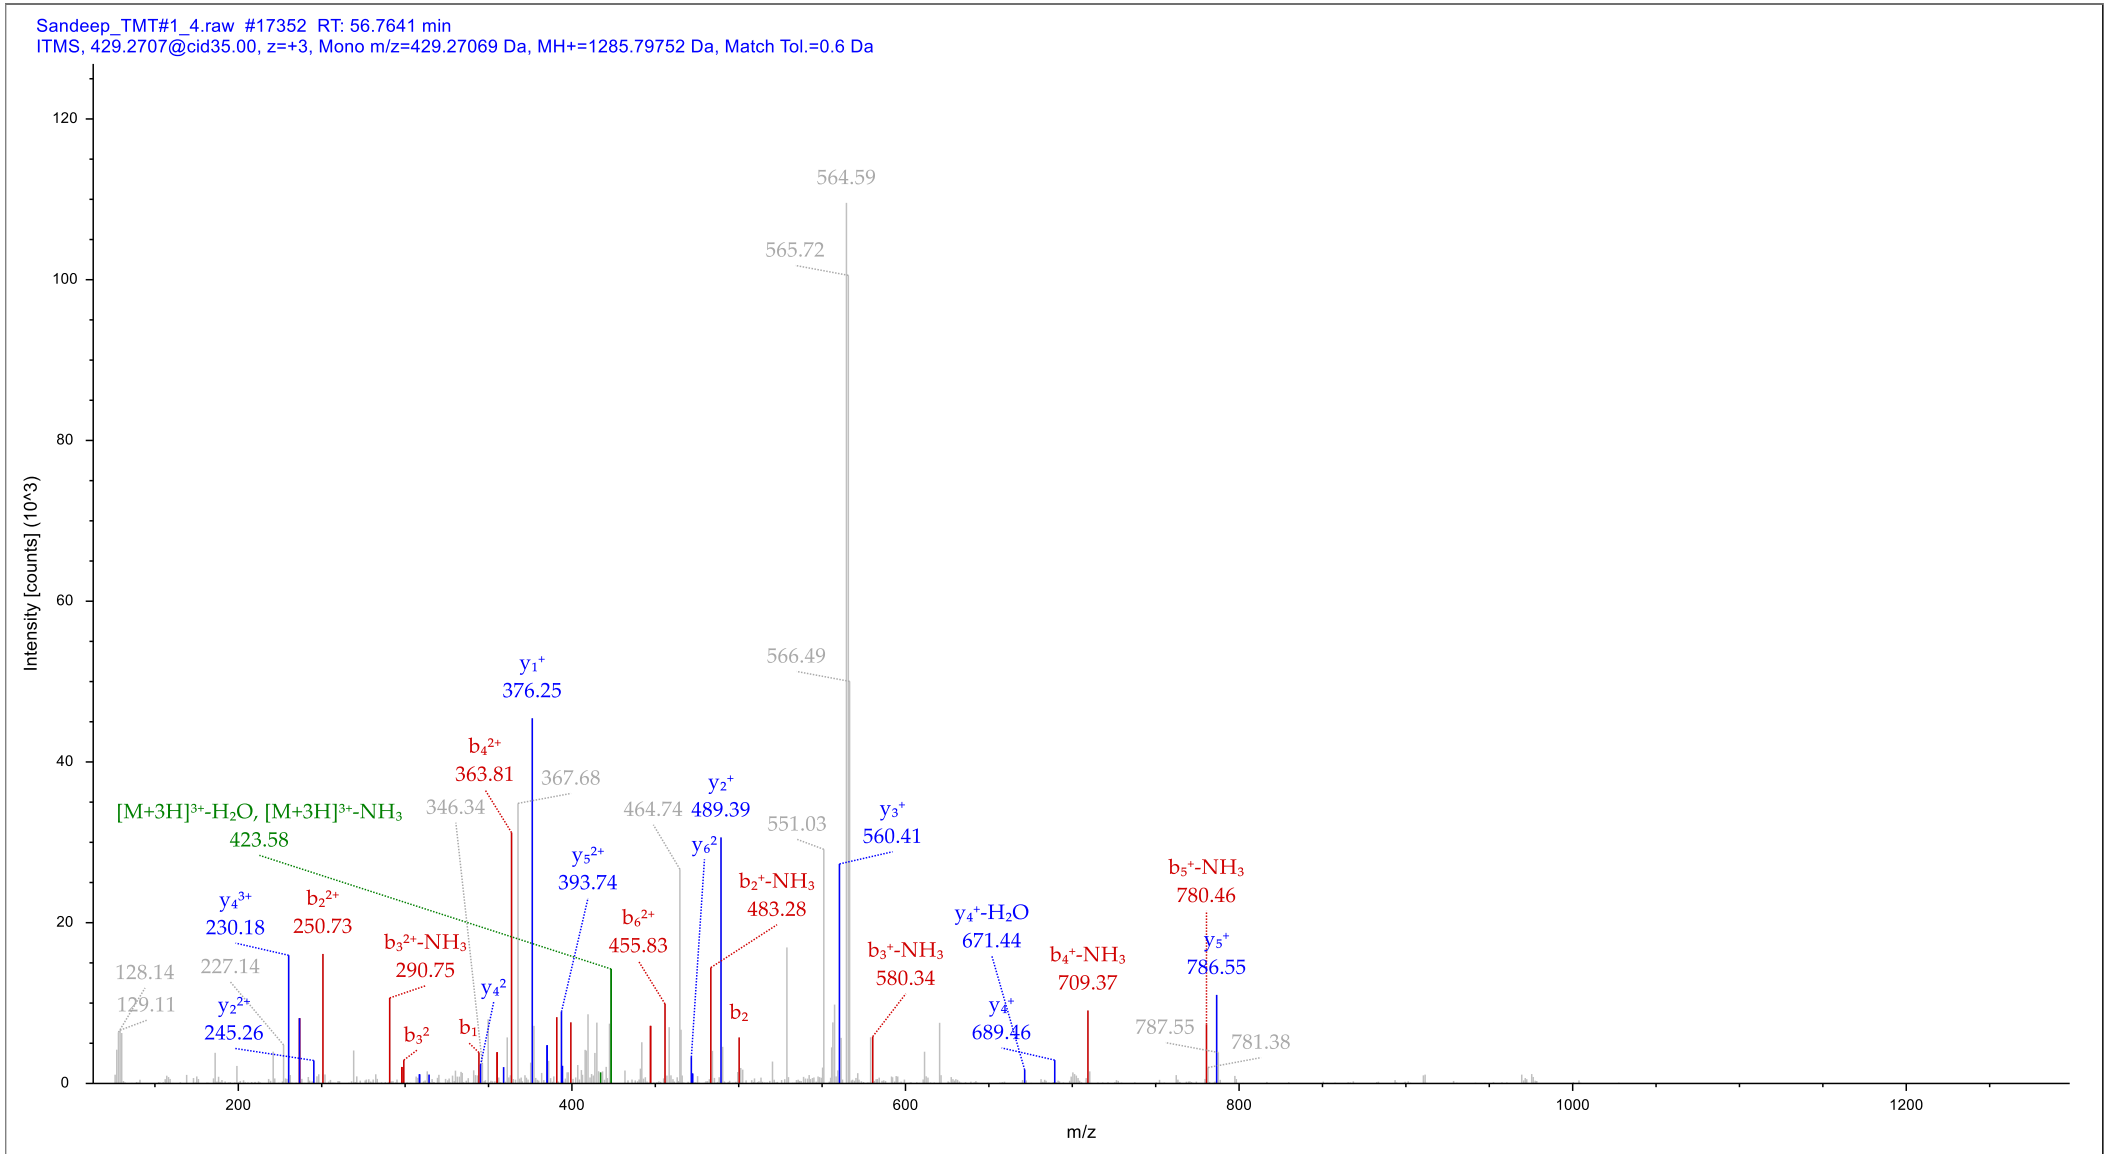

## Peptide consensus view

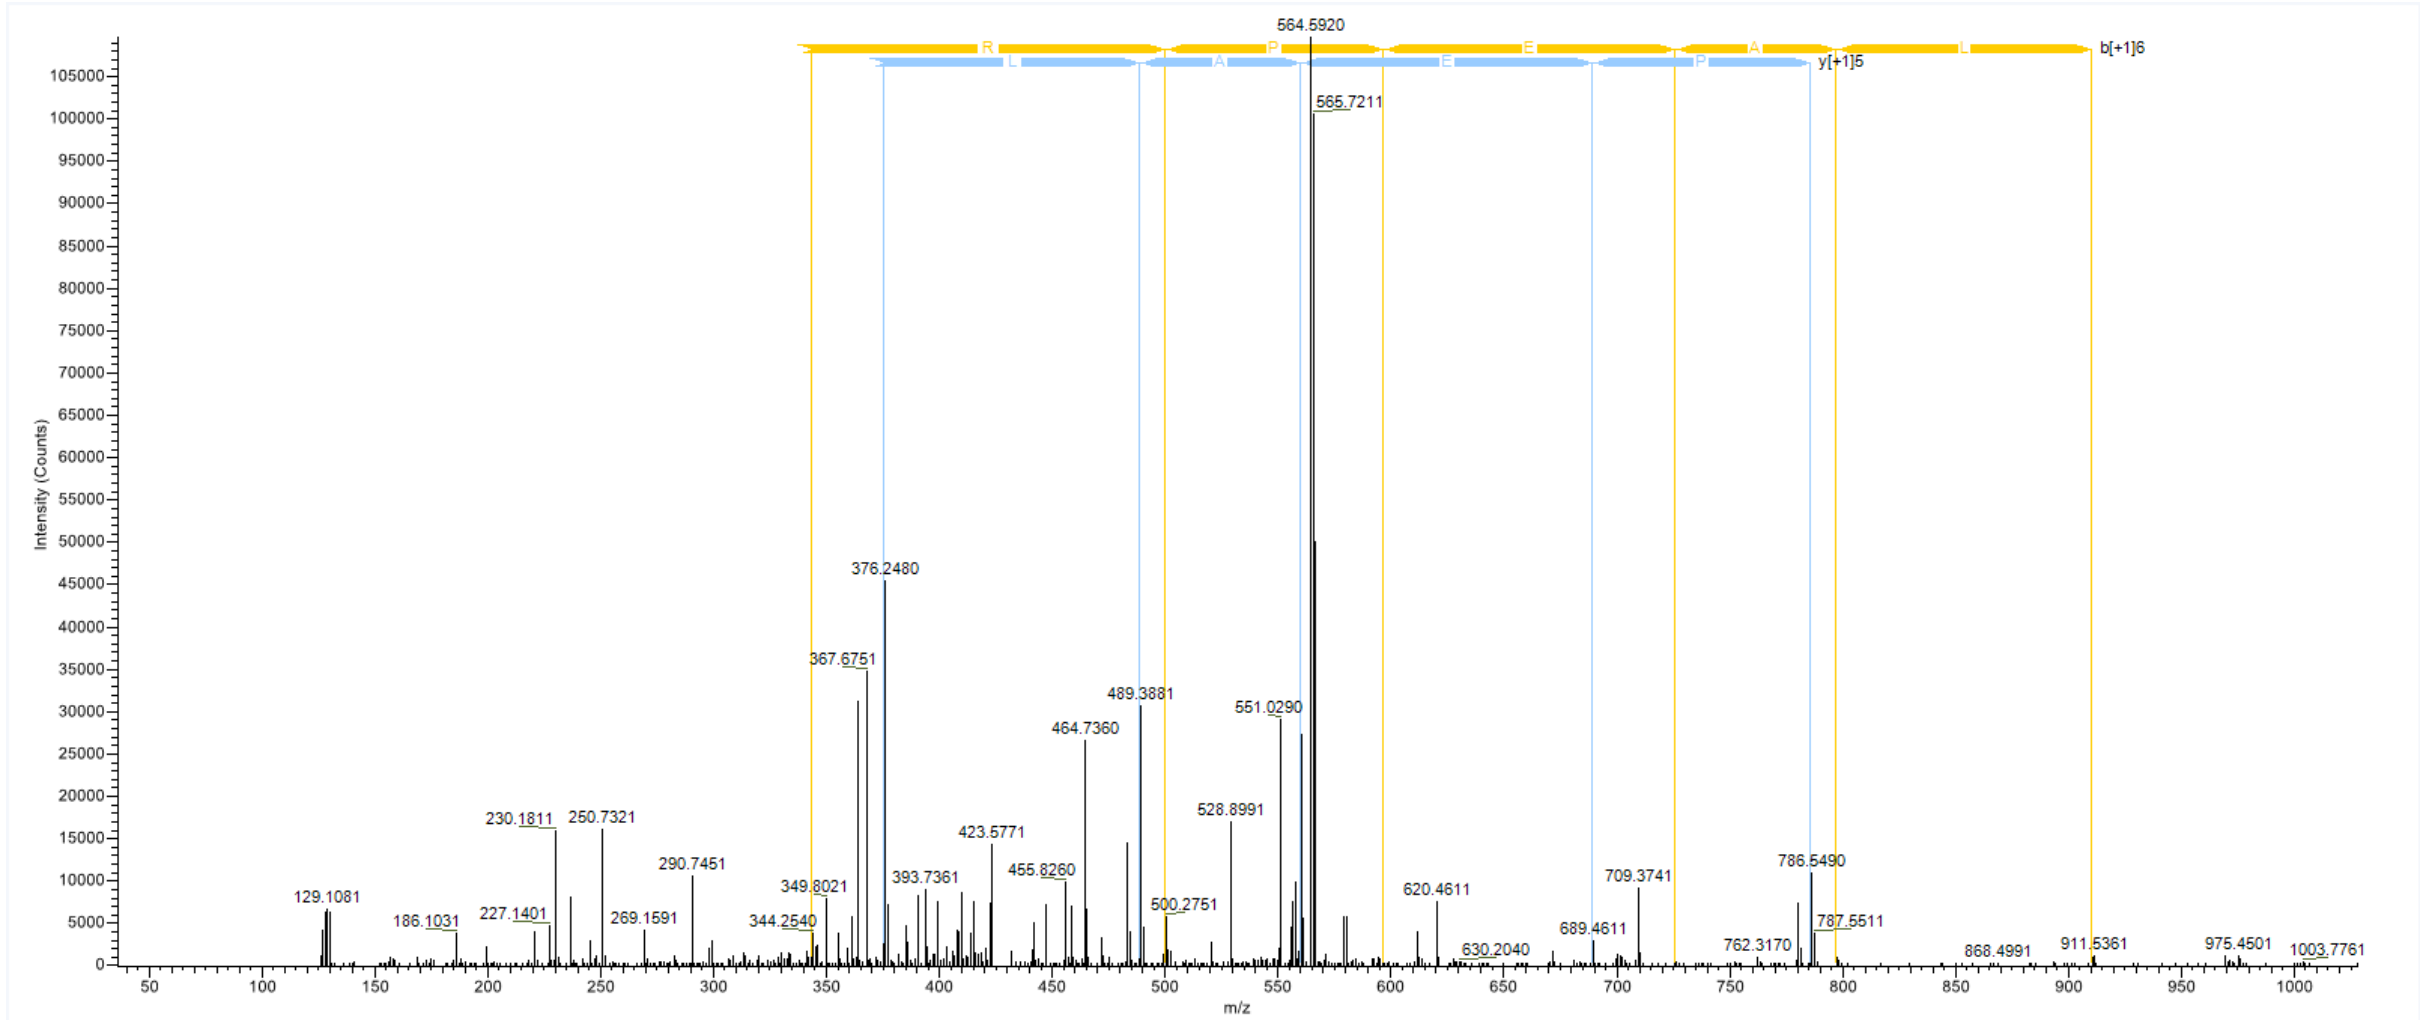

*n* R P E A L *k*

Sequence: LLDDNGNIAEELSILK, K16-TMT6plex (229.16293 Da), L1-TMT6plex (229.16293 Da)  
 Charge: +2, Monoisotopic m/z: 1108.13416 Da (+1.23 mmu/+1.11 ppm), MH+: 2215.26103 Da, RT: 141.1812 min,  
 Identified with: Sequest HT (v1.17); XCorr:6.81, Percolator q-Value:0.0e0, Percolator PEP:4.1e-7, Ions matched by search engine: 0/0  
 Fragment match tolerance used for search: 0.6 Da  
 Fragments used for search: b; b-H<sub>2</sub>O; b-NH<sub>3</sub>; y; y-H<sub>2</sub>O; y-NH<sub>3</sub>  
 Protein references (1): Selenoprotein F OS=Mus musculus OX=10090 GN=Selenof PE=1 SV=3

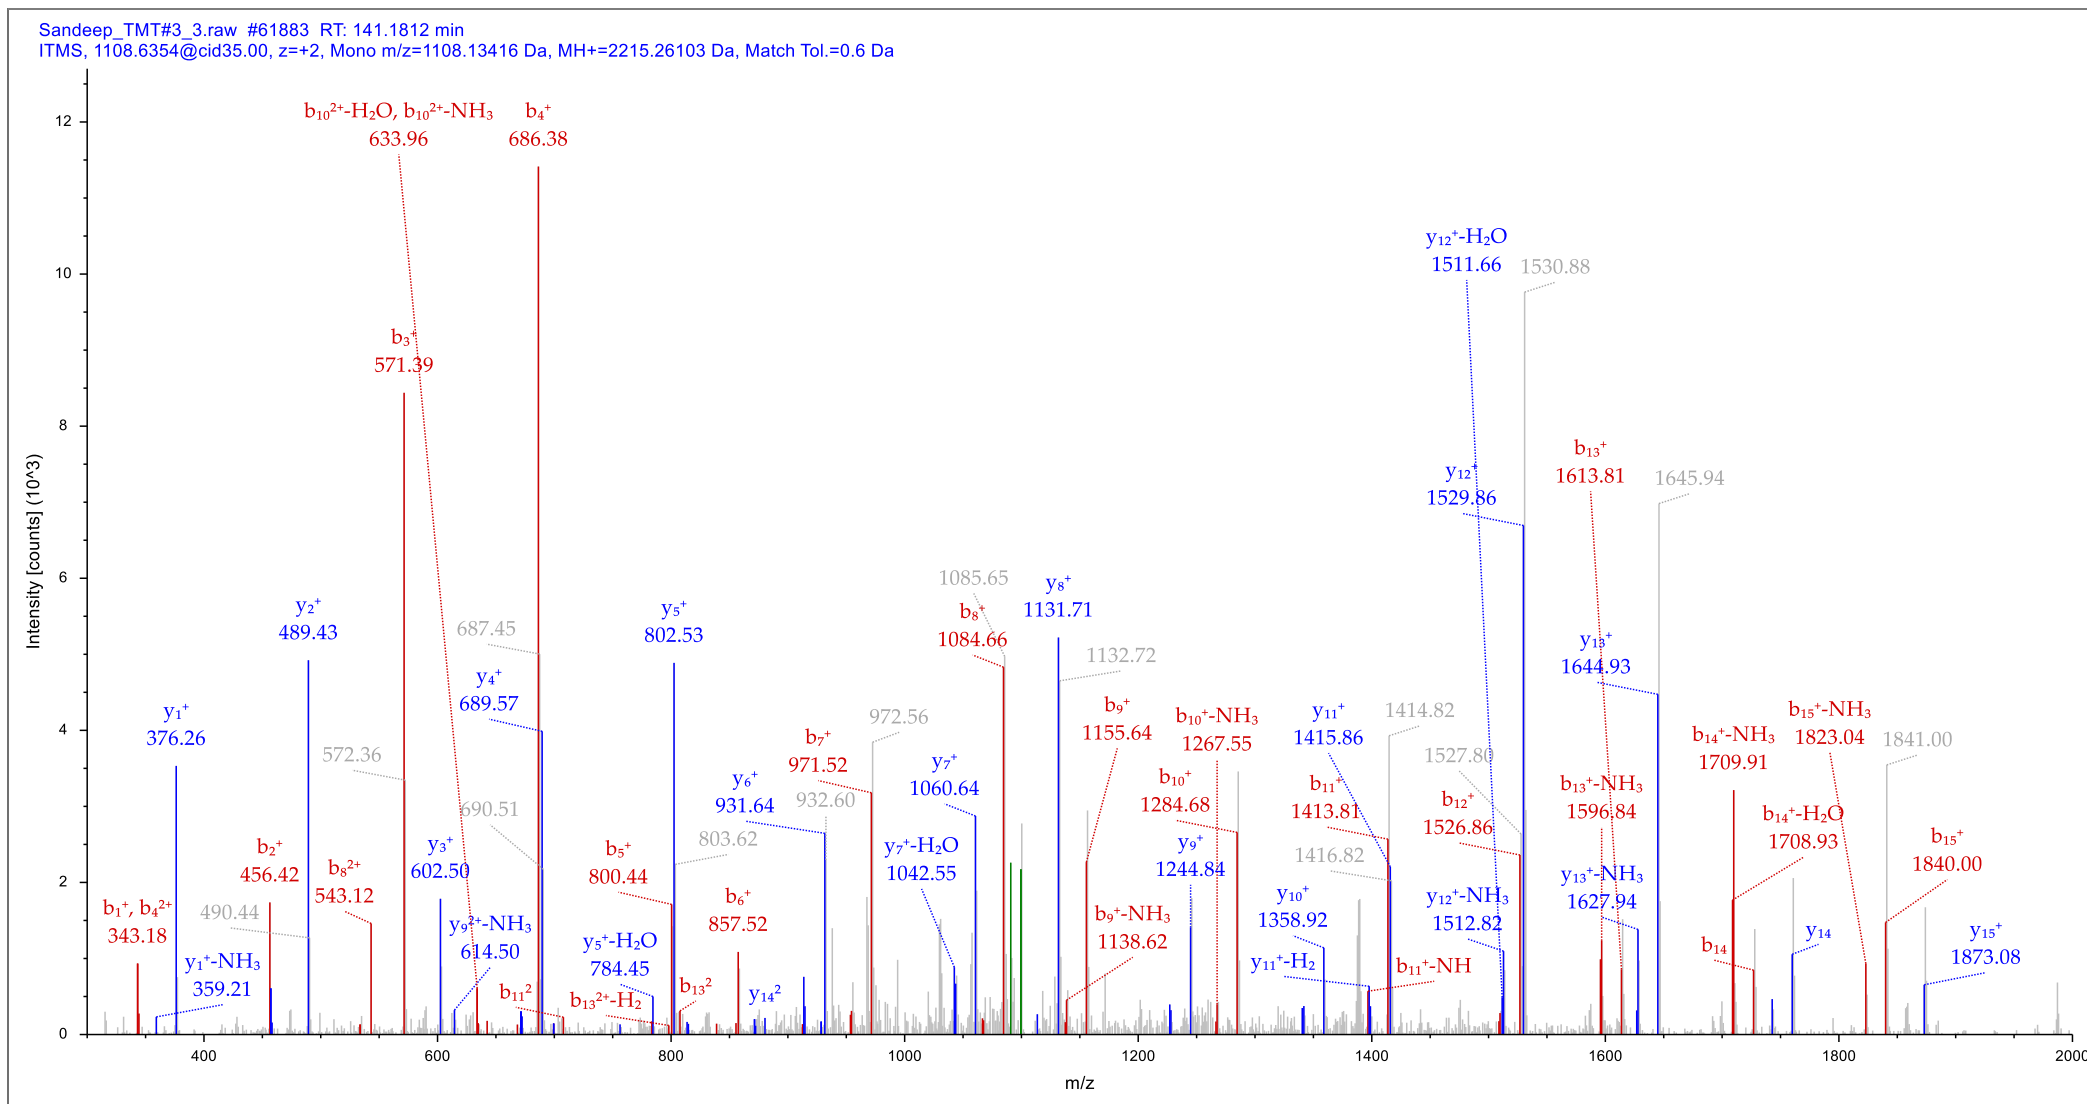

# Peptide consensus view

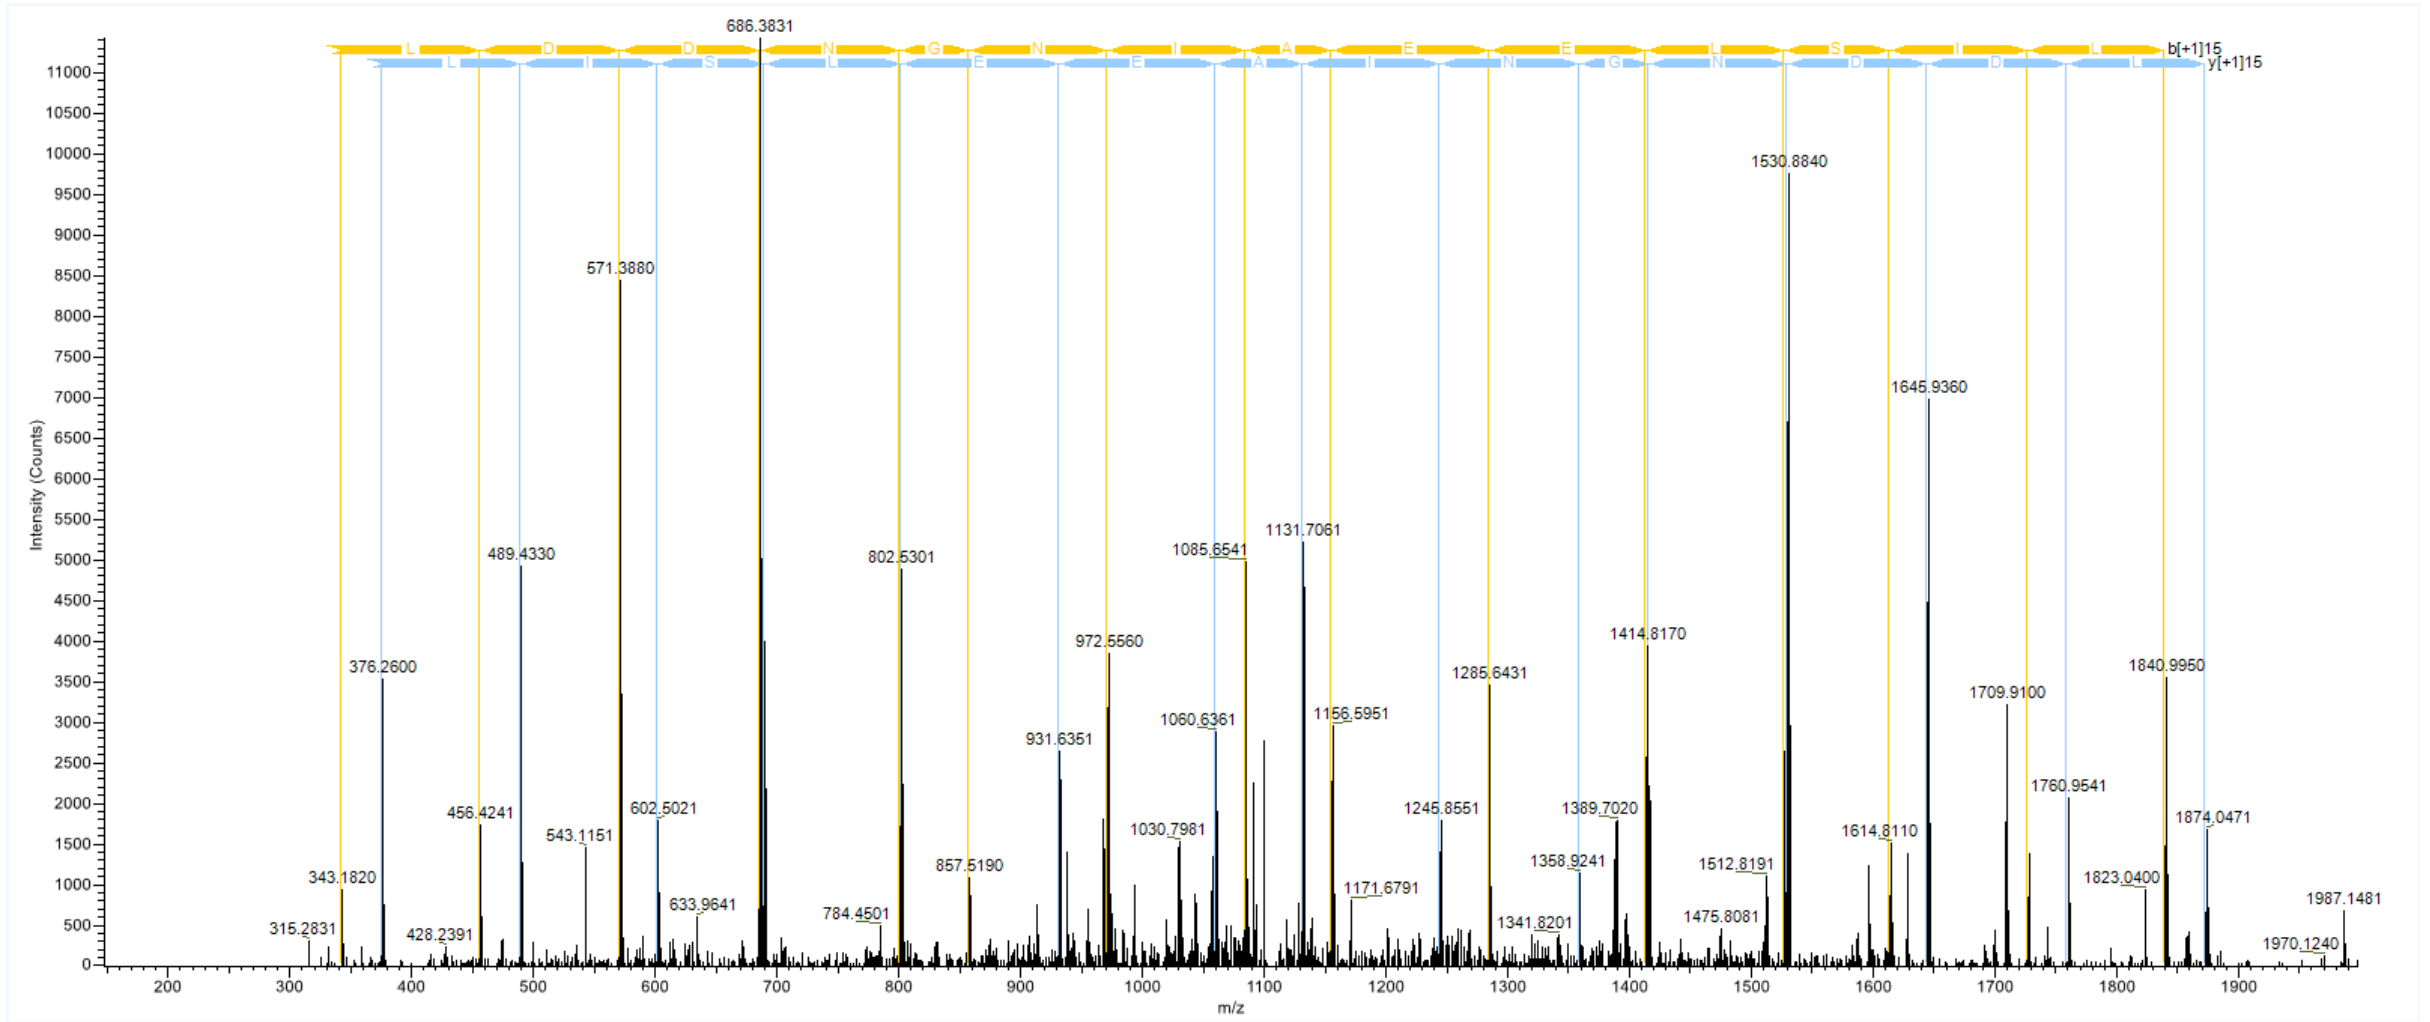

L L D D N G N I A E E L S I L k

Sequence: WNTDSVEEFLSEK, K13-TMT6plex (229.16293 Da), W1-TMT6plex (229.16293 Da)

Charge: +2, Monoisotopic m/z: 1021.52631 Da (-1.46 mmu/-1.43 ppm), MH+: 2042.04534 Da, RT: 139.0006 min,

Identified with: Sequest HT (v1.17); XCorr:6.13, Percolator q-Value:0.0e0, Percolator PEP:6.4e-7, Ions matched by search engine: 0/0

Fragment match tolerance used for search: 0.6 Da

Fragments used for search: b; b-H<sub>2</sub>O; b-NH<sub>3</sub>; y; y-H<sub>2</sub>O; y-NH<sub>3</sub>

Protein references (1): Selenoprotein F OS=Mus musculus OX=10090 GN=Selenof PE=1 SV=3

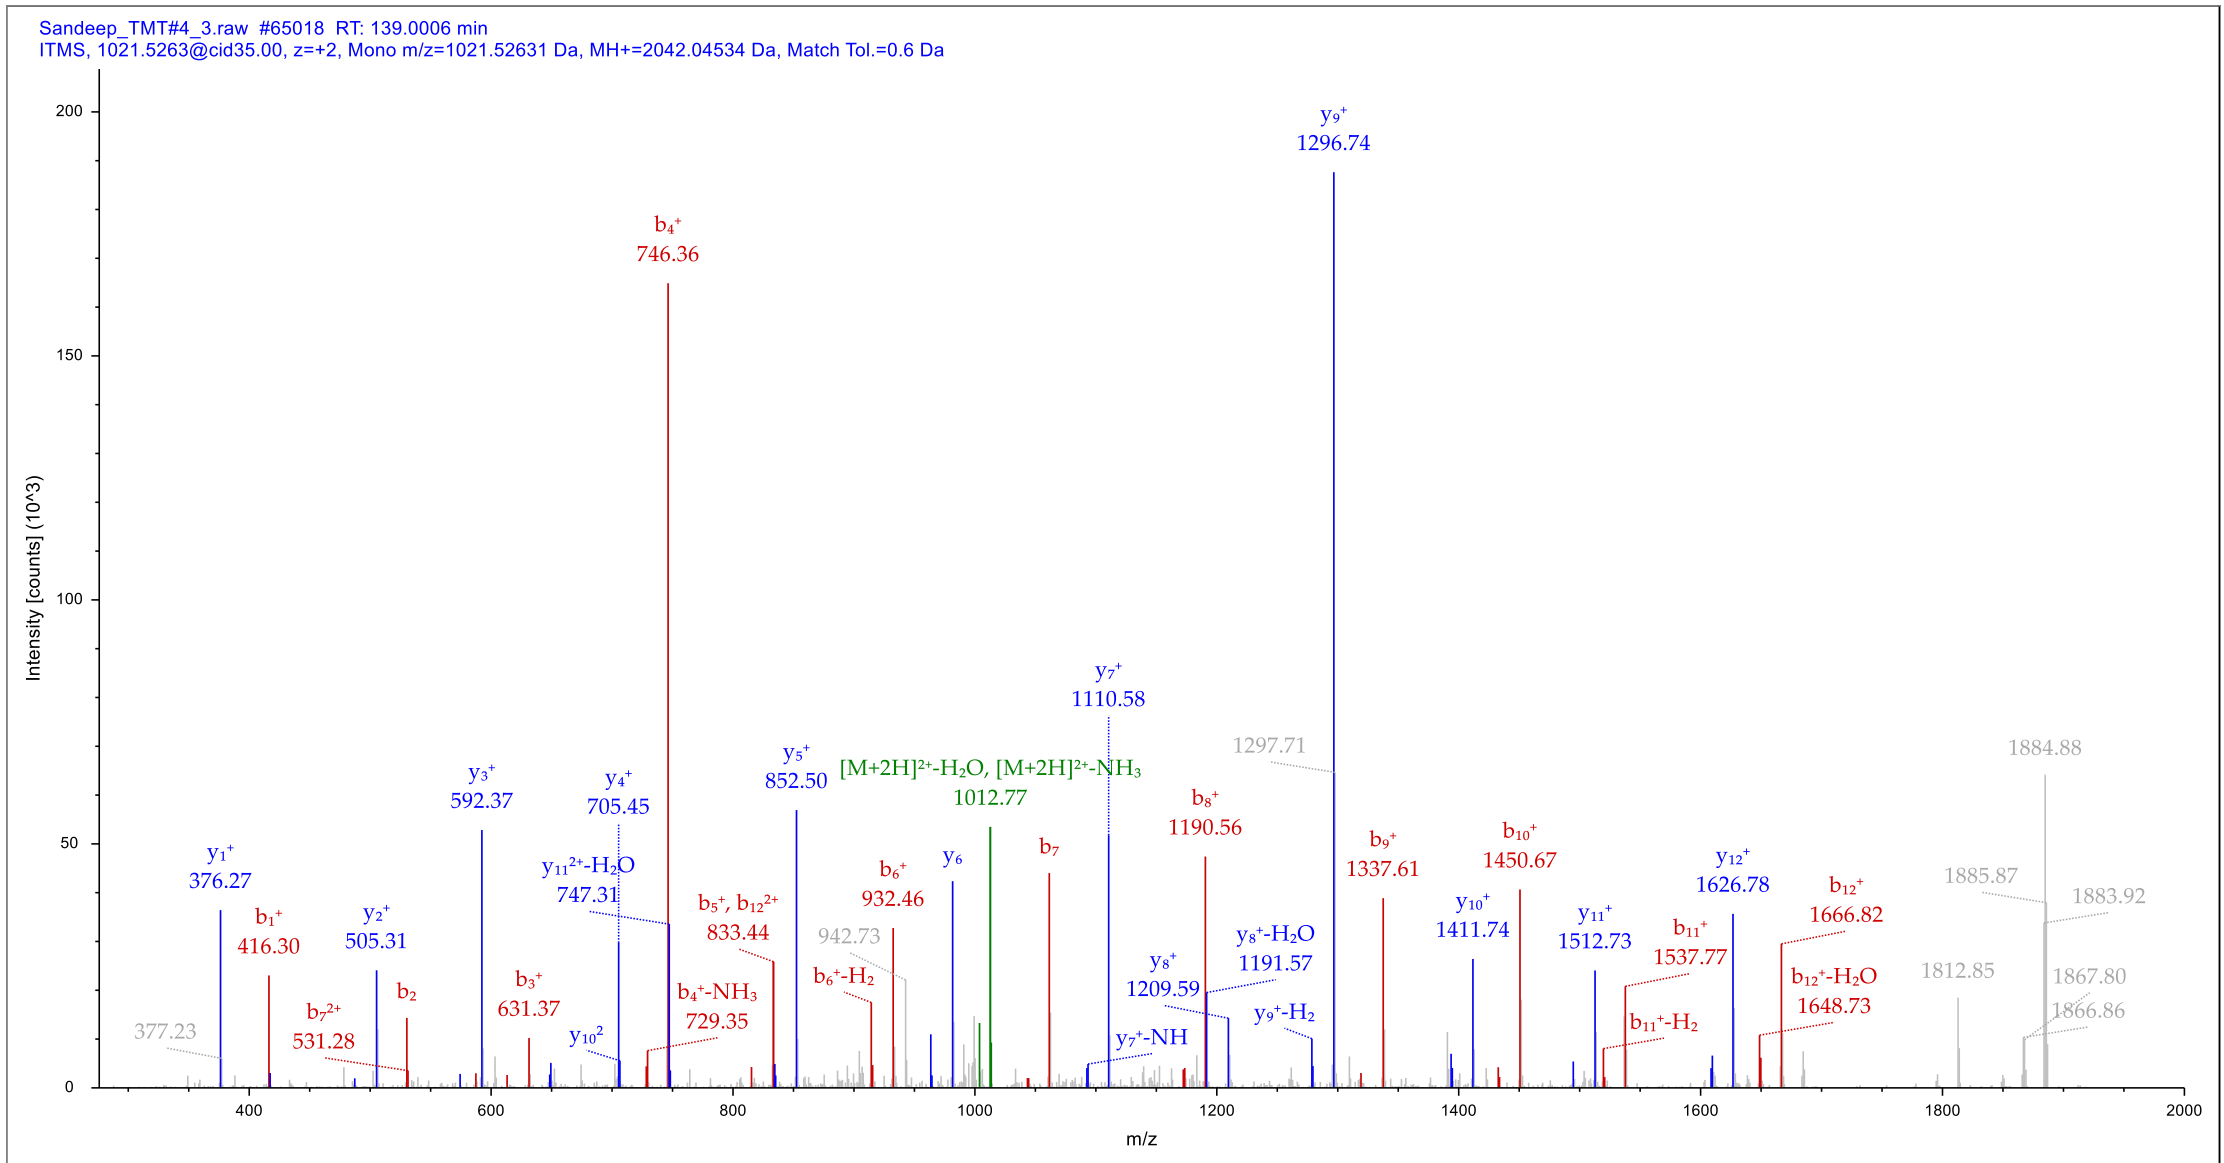

# Peptide consensus view

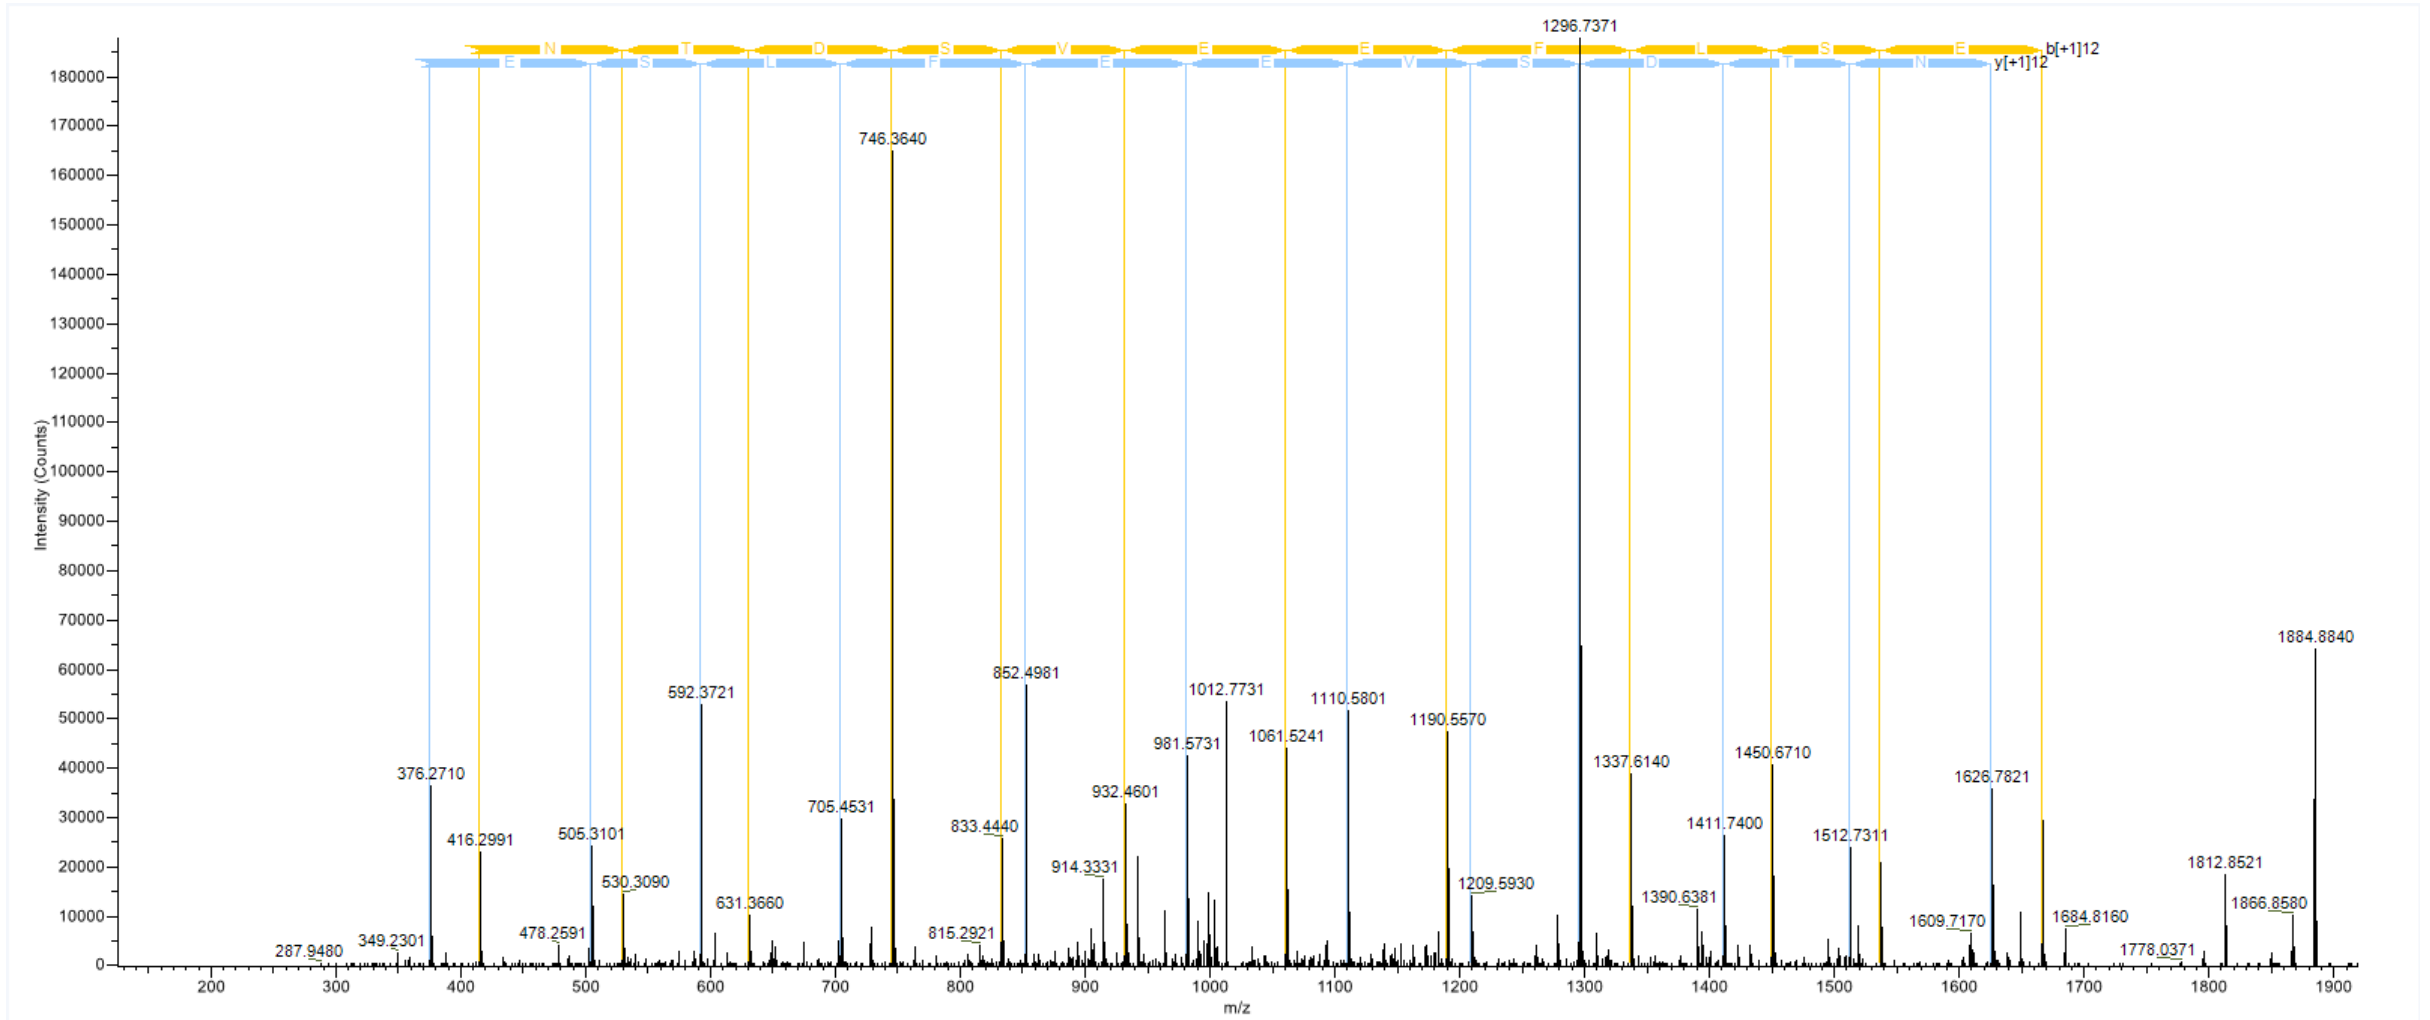

W N T D S V E E F L S E K

Sequence: YSALDTNPLSLYIMHPFWNTIVK, N19-Deamidated (0.98402 Da), K23-TMT6plex (229.16293 Da), Y1-TMT6plex (229.16293 Da)  
Charge: +3, Monoisotopic m/z: 1061.57813 Da (+6.59 mmu/+6.21 ppm), MH+: 3182.71982 Da, RT: 146.2020 min,  
Identified with: Sequest HT (v1.17); XCorr:6.85, Percolator q-Value:0.0e0, Percolator PEP:4.9e-6, Ions matched by search engine: 0/0  
Fragment match tolerance used for search: 0.6 Da  
Fragments used for search: b; b-H<sub>2</sub>O; b-NH<sub>3</sub>; y; y-H<sub>2</sub>O; y-NH<sub>3</sub>  
Protein references (1): Ethanolaminephosphotransferase 1 OS=Mus musculus OX=10090 GN=Selenoi PE=2 SV=3

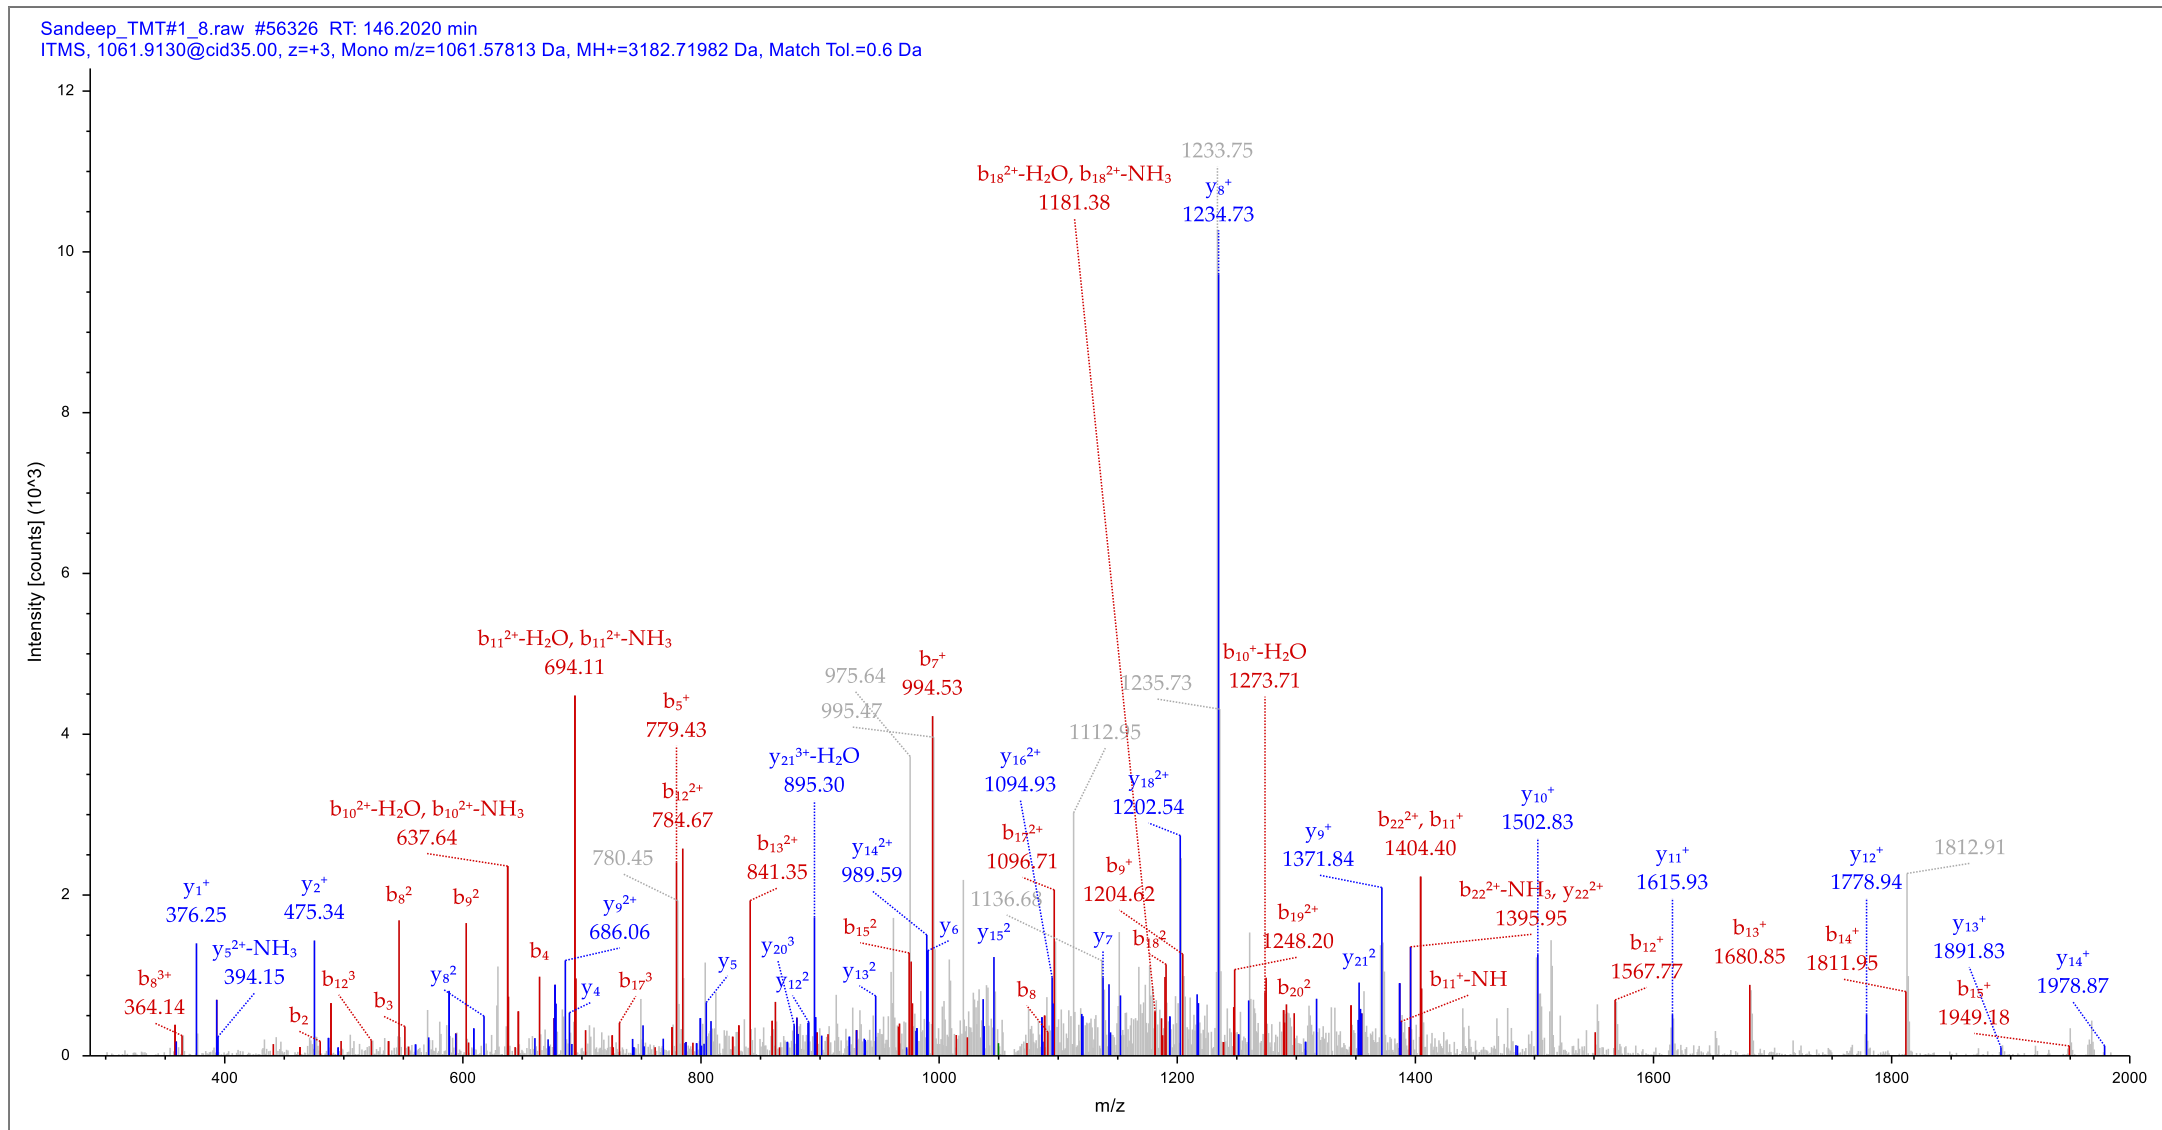



## Peptide consensus view

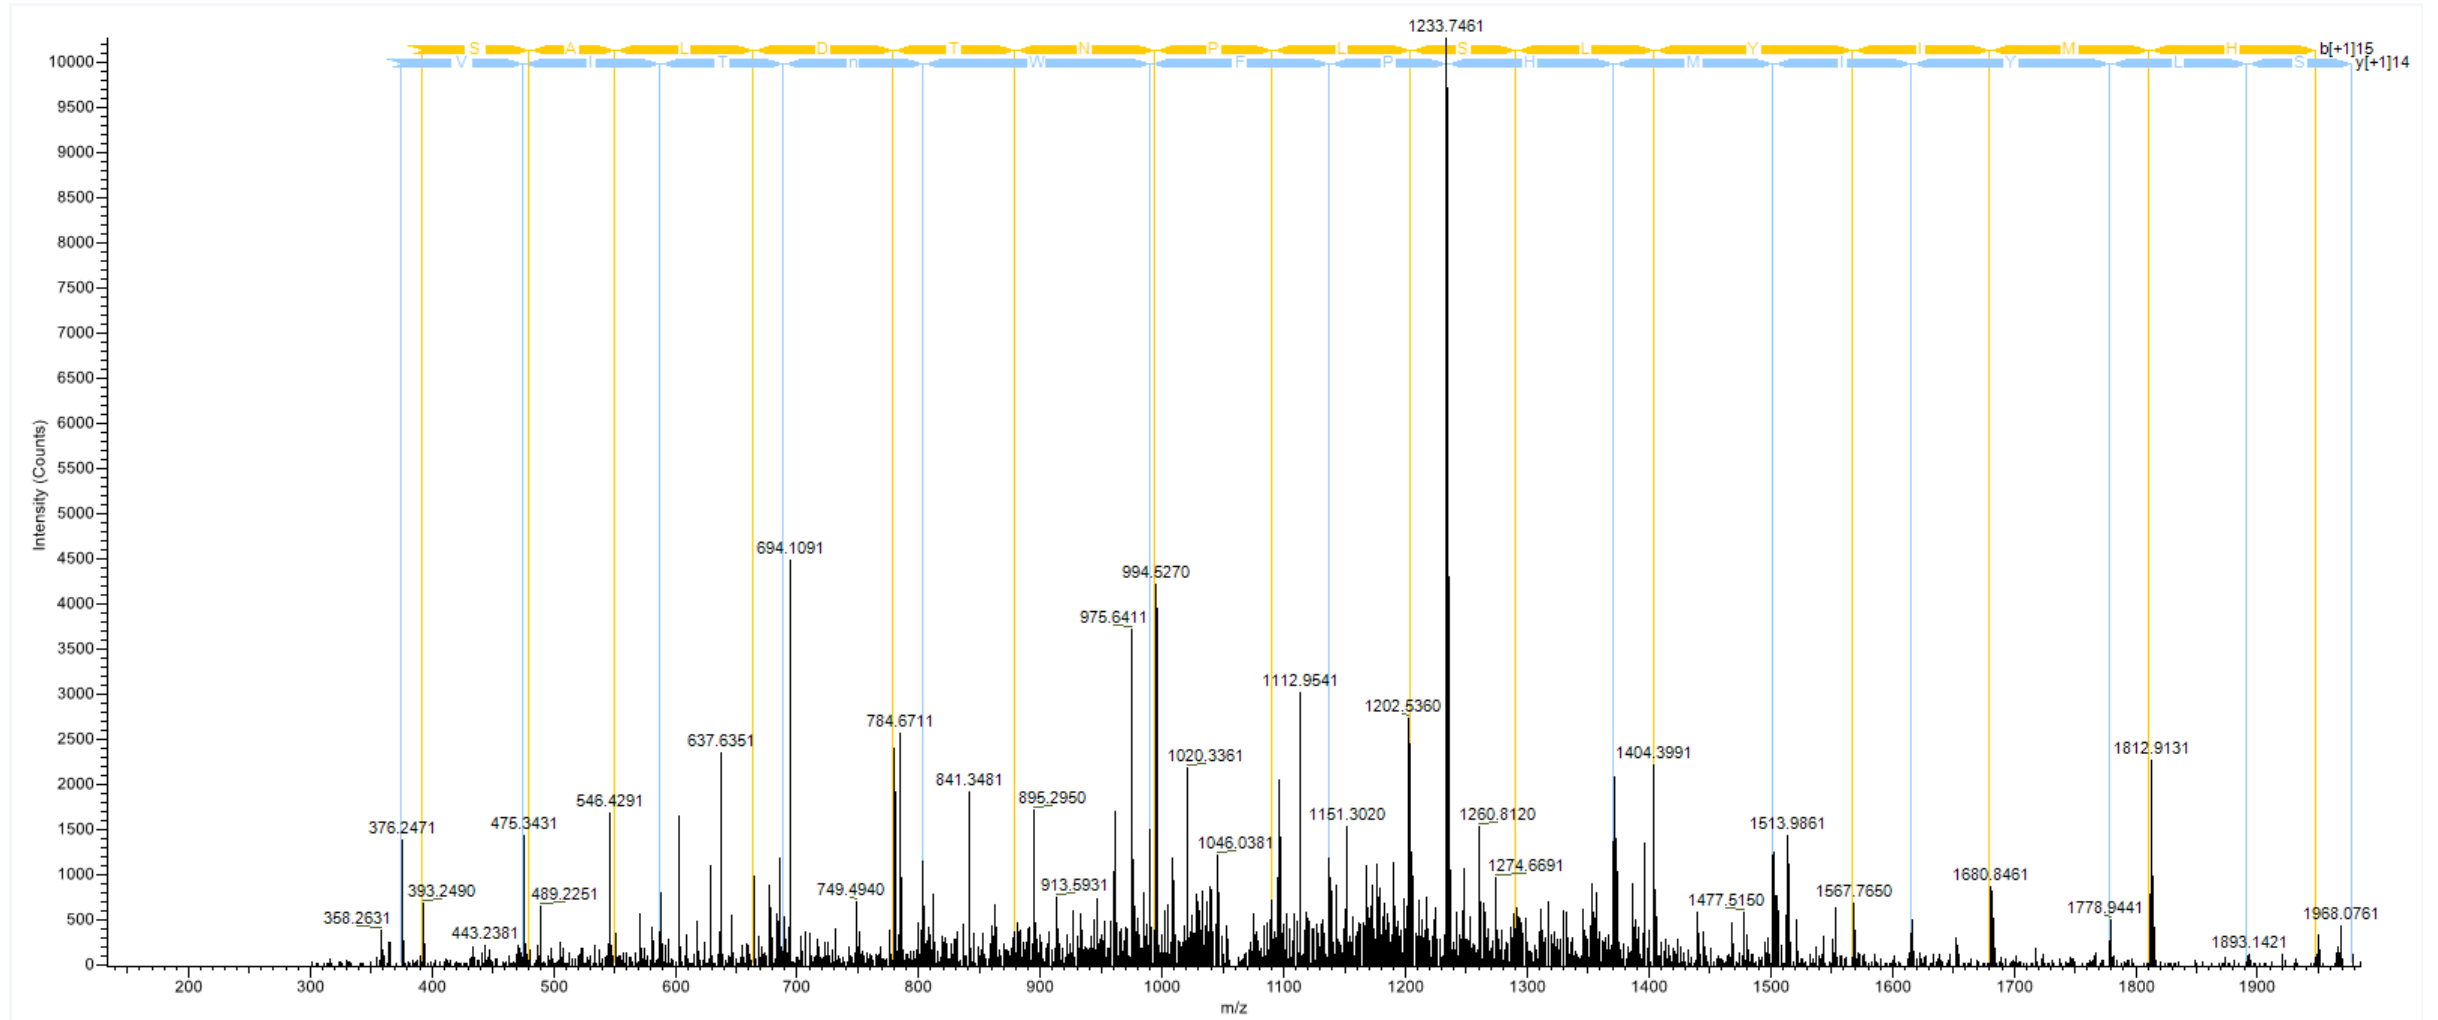

**y** ] S ] A ] L ] D ] T ] N ] P ] L ] S ] L ] Y ] I ] M ] H ] P ] F ] W ] *n* ] T ] I ] V ] *k*

Sequence: TLLQQDVK, K8-TMT6plex (229.16293 Da), T1-TMT6plex (229.16293 Da)  
Charge: +2, Monoisotopic m/z: 701.93555 Da (-1.59 mmu/-2.26 ppm), MH+: 1402.86382 Da, RT: 95.0107 min,  
Identified with: Sequest HT (v1.17); XCorr:2.92, Percolator q-Value:9.8e-4, Percolator PEP:8.5e-3, Ions matched by search engine: 0/0  
Fragment match tolerance used for search: 0.6 Da  
Fragments used for search: b; b-H<sub>2</sub>O; b-NH<sub>3</sub>; y; y-H<sub>2</sub>O; y-NH<sub>3</sub>  
Protein references (1): Selenoprotein K OS=Mus musculus OX=10090 GN=Selenok PE=1 SV=3

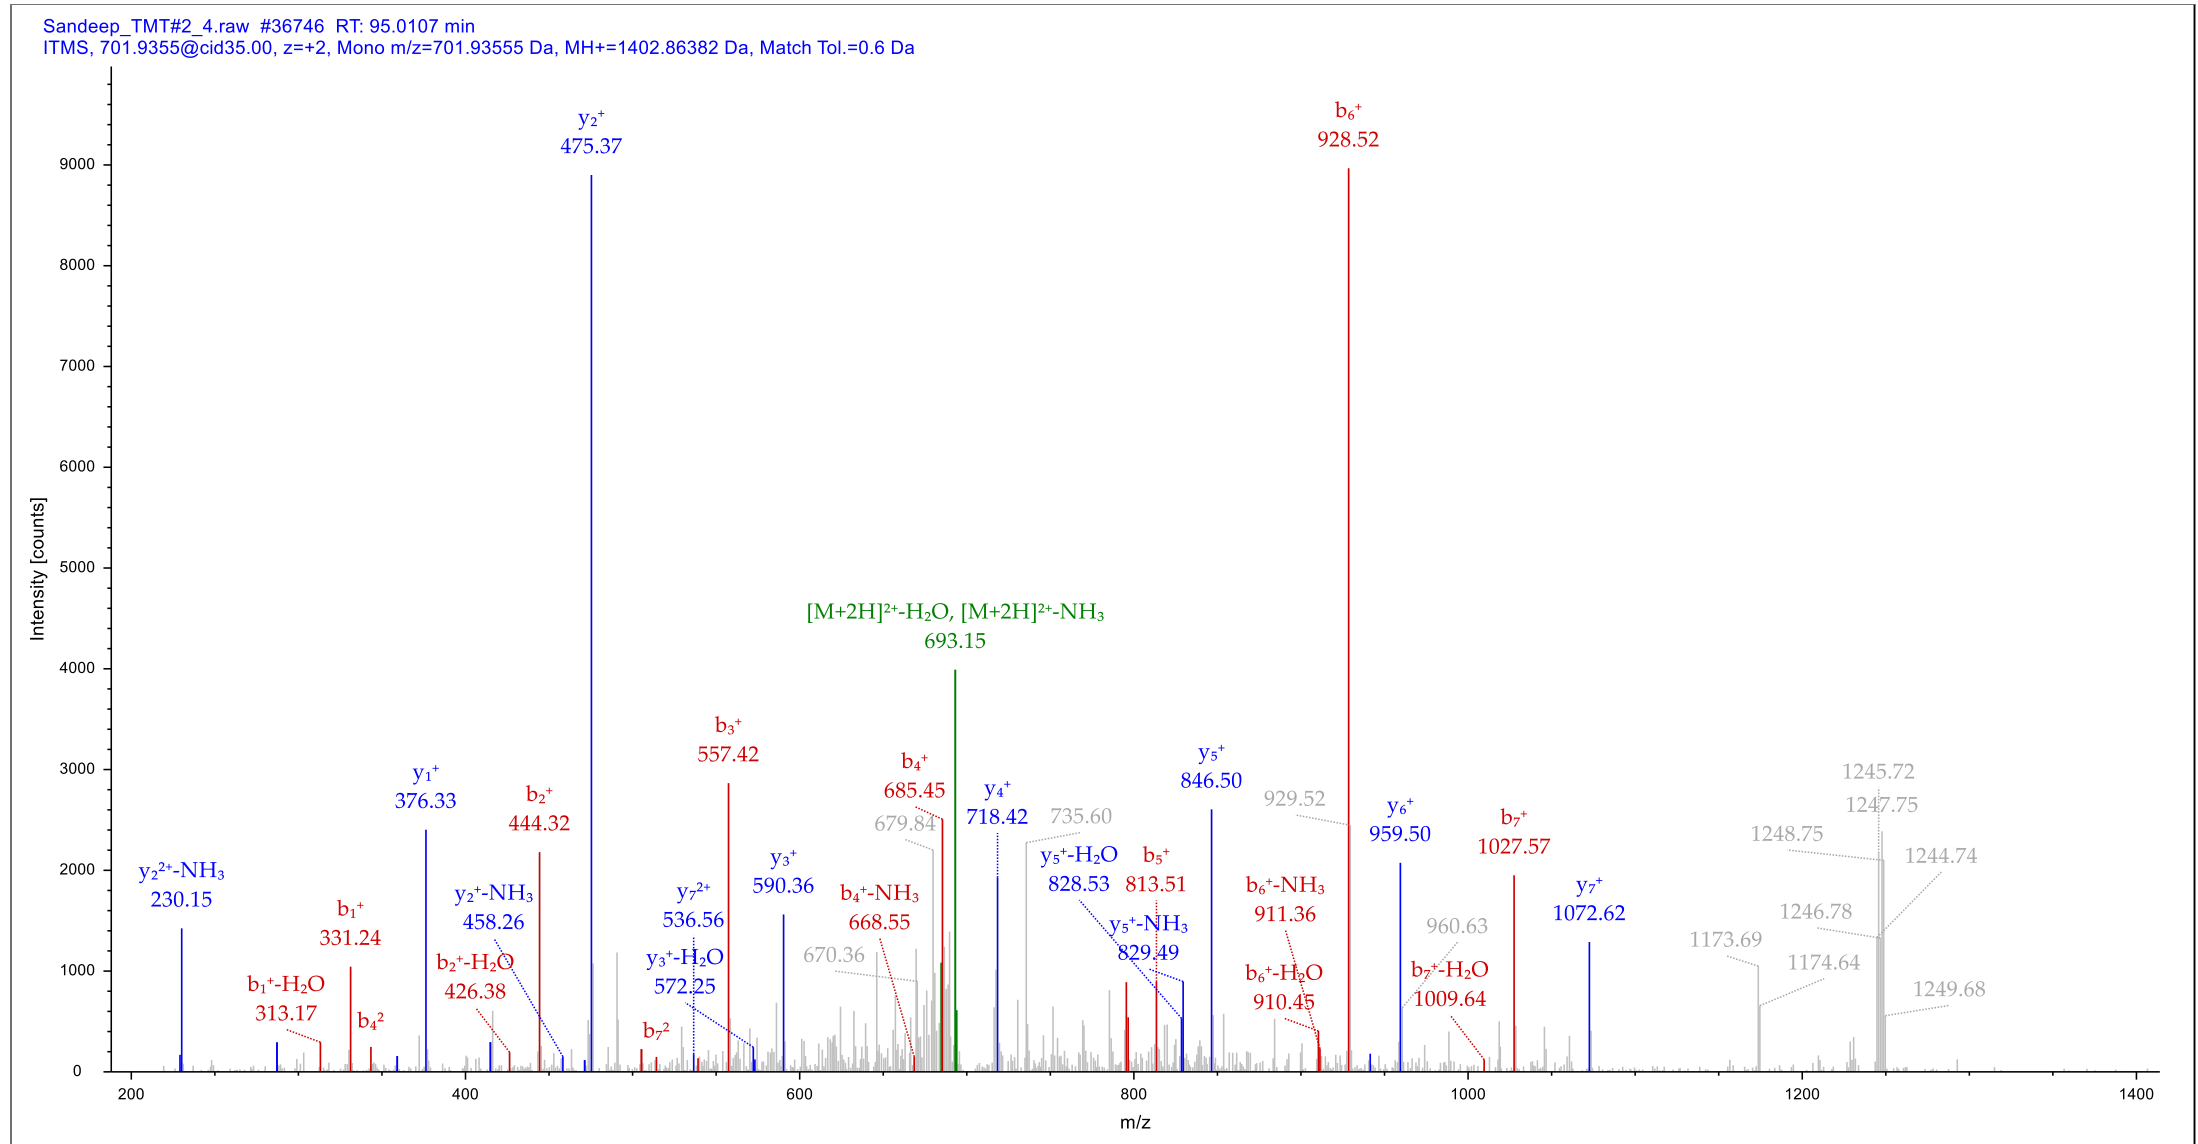

# Peptide consensus view

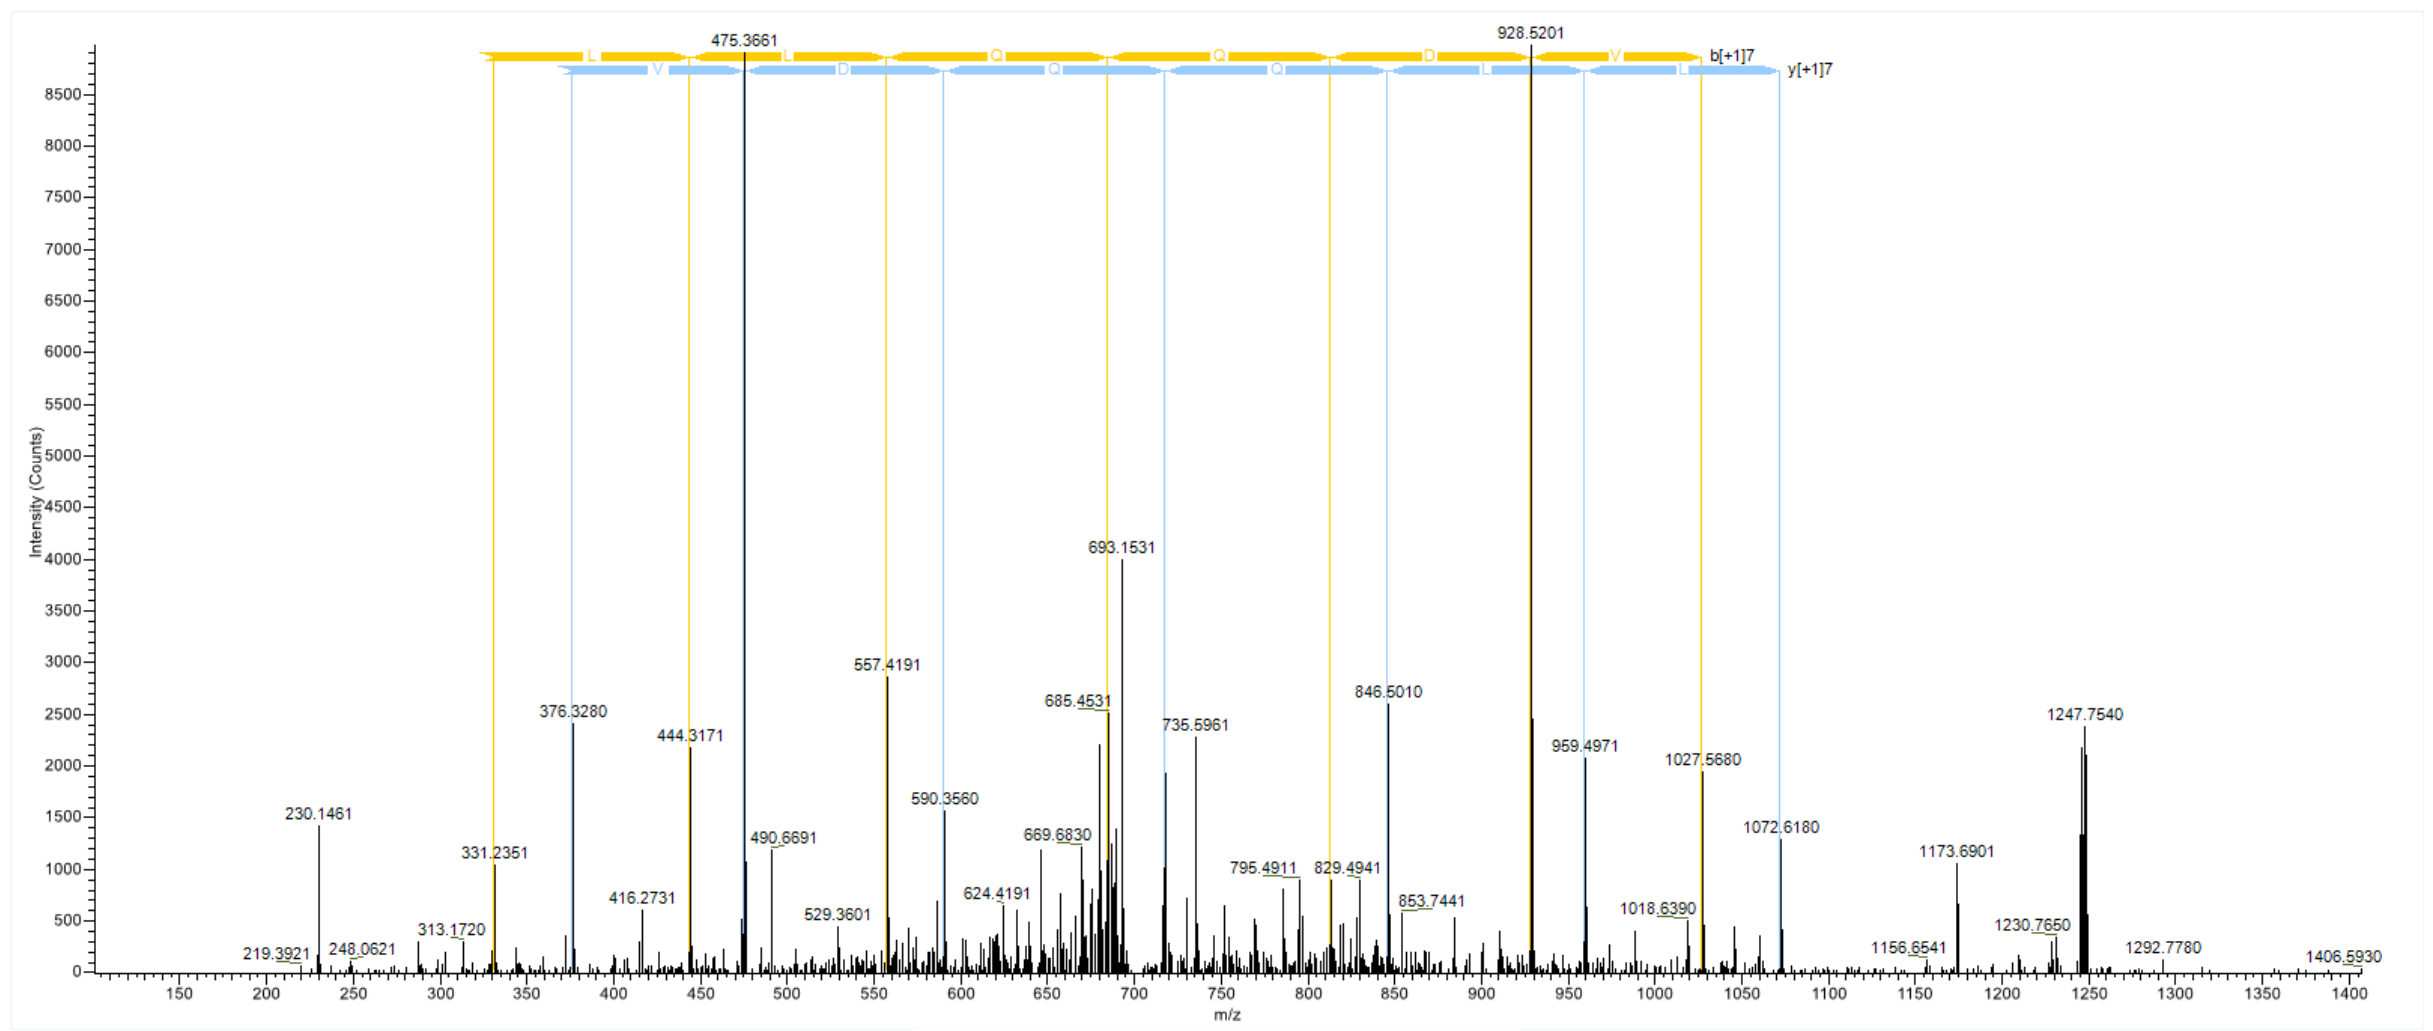

t L L Q Q D V L k

Sequence: GYGSSSDSR, G1-TMT6plex (229.16293 Da)  
Charge: +2, Monoisotopic m/z: 572.77490 Da (-0.33 mmu/-0.58 ppm), MH+: 1144.54253 Da, RT: 38.1528 min,  
Identified with: Sequest HT (v1.17); XCorr:2.73, Percolator q-Value:2.3e-4, Percolator PEP:1.1e-3, Ions matched by search engine: 0/0  
Fragment match tolerance used for search: 0.6 Da  
Fragments used for search: b; b-H<sub>2</sub>O; y; y-H<sub>2</sub>O; y-NH<sub>3</sub>  
Protein references (1): Selenoprotein K OS=Mus musculus OX=10090 GN=Selenok PE=1 SV=3

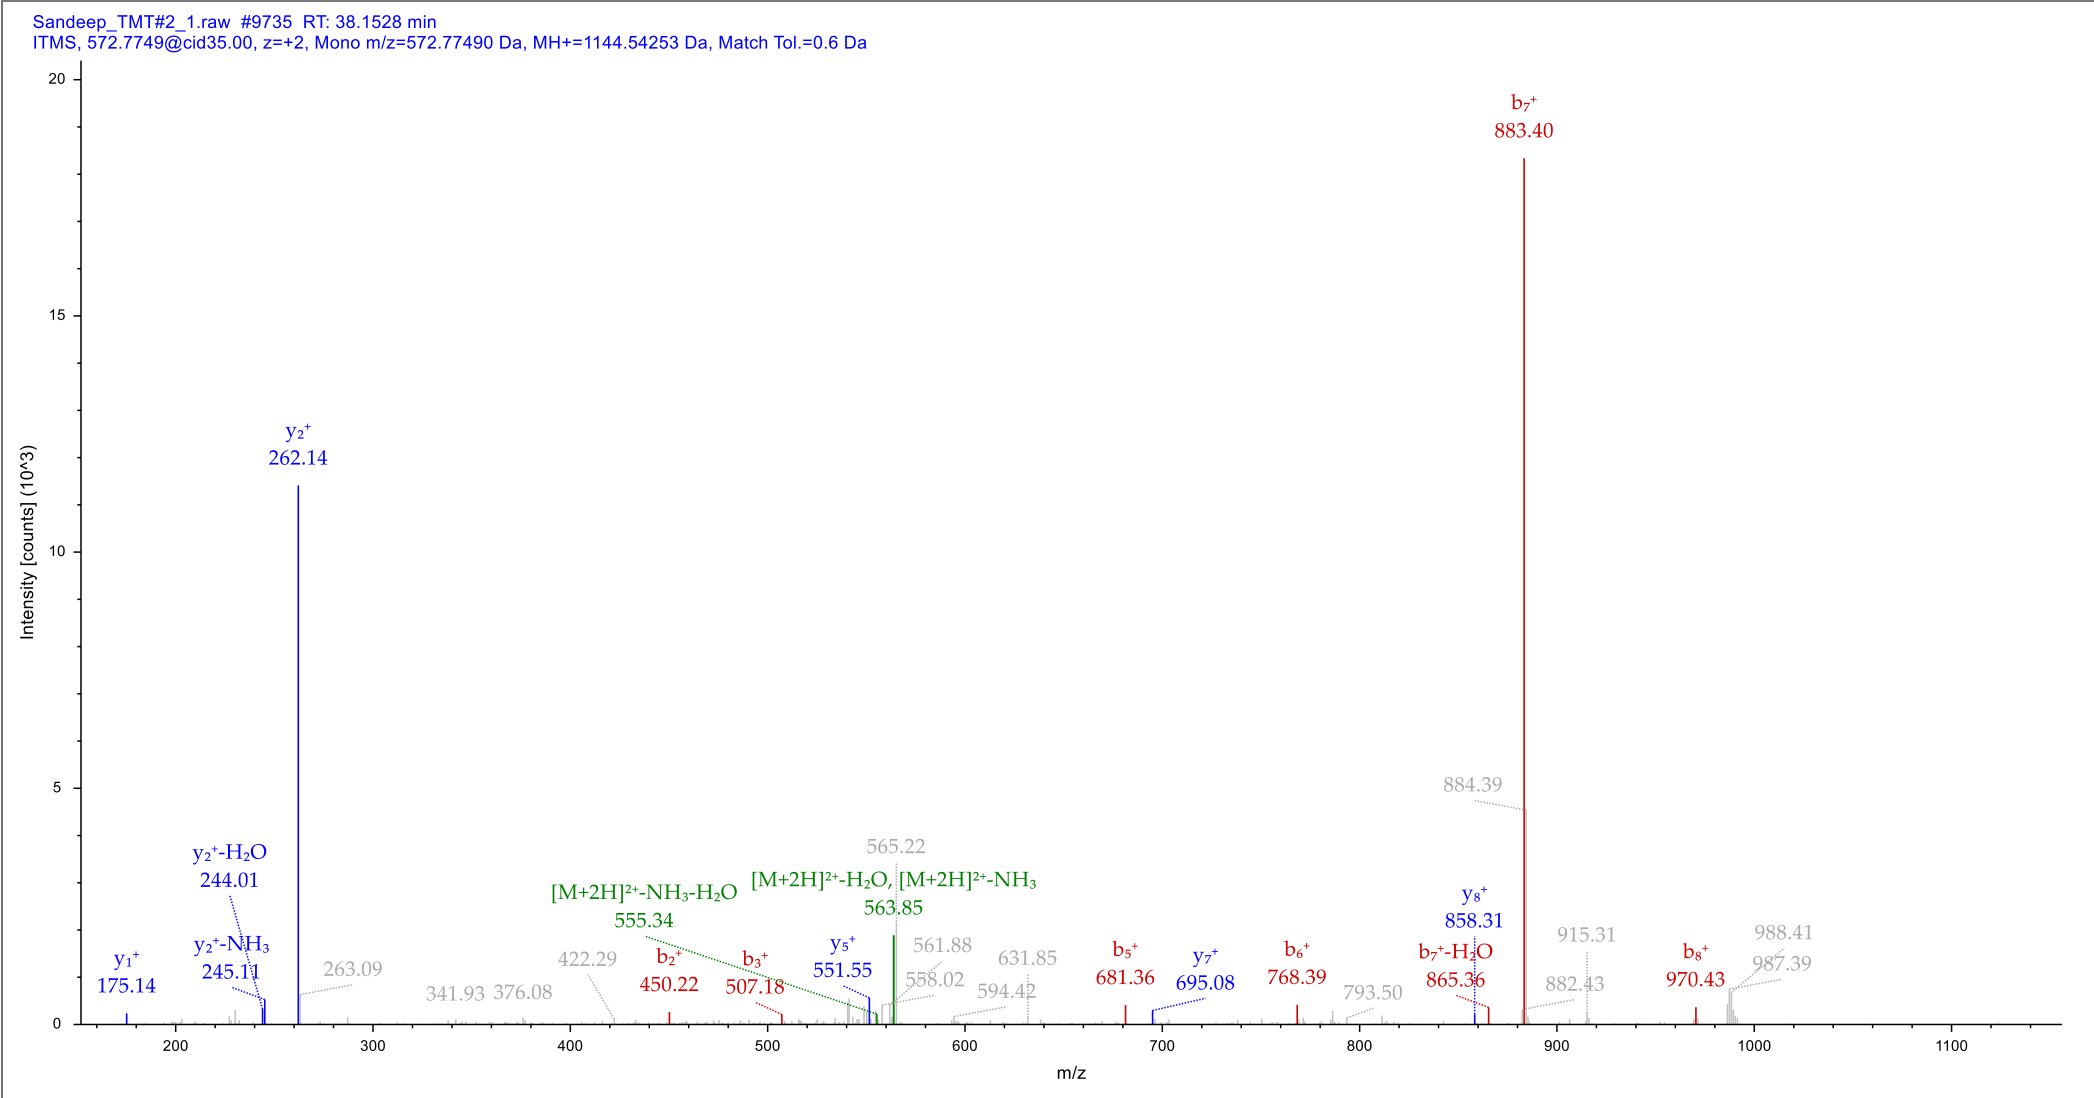

## Peptide consensus view

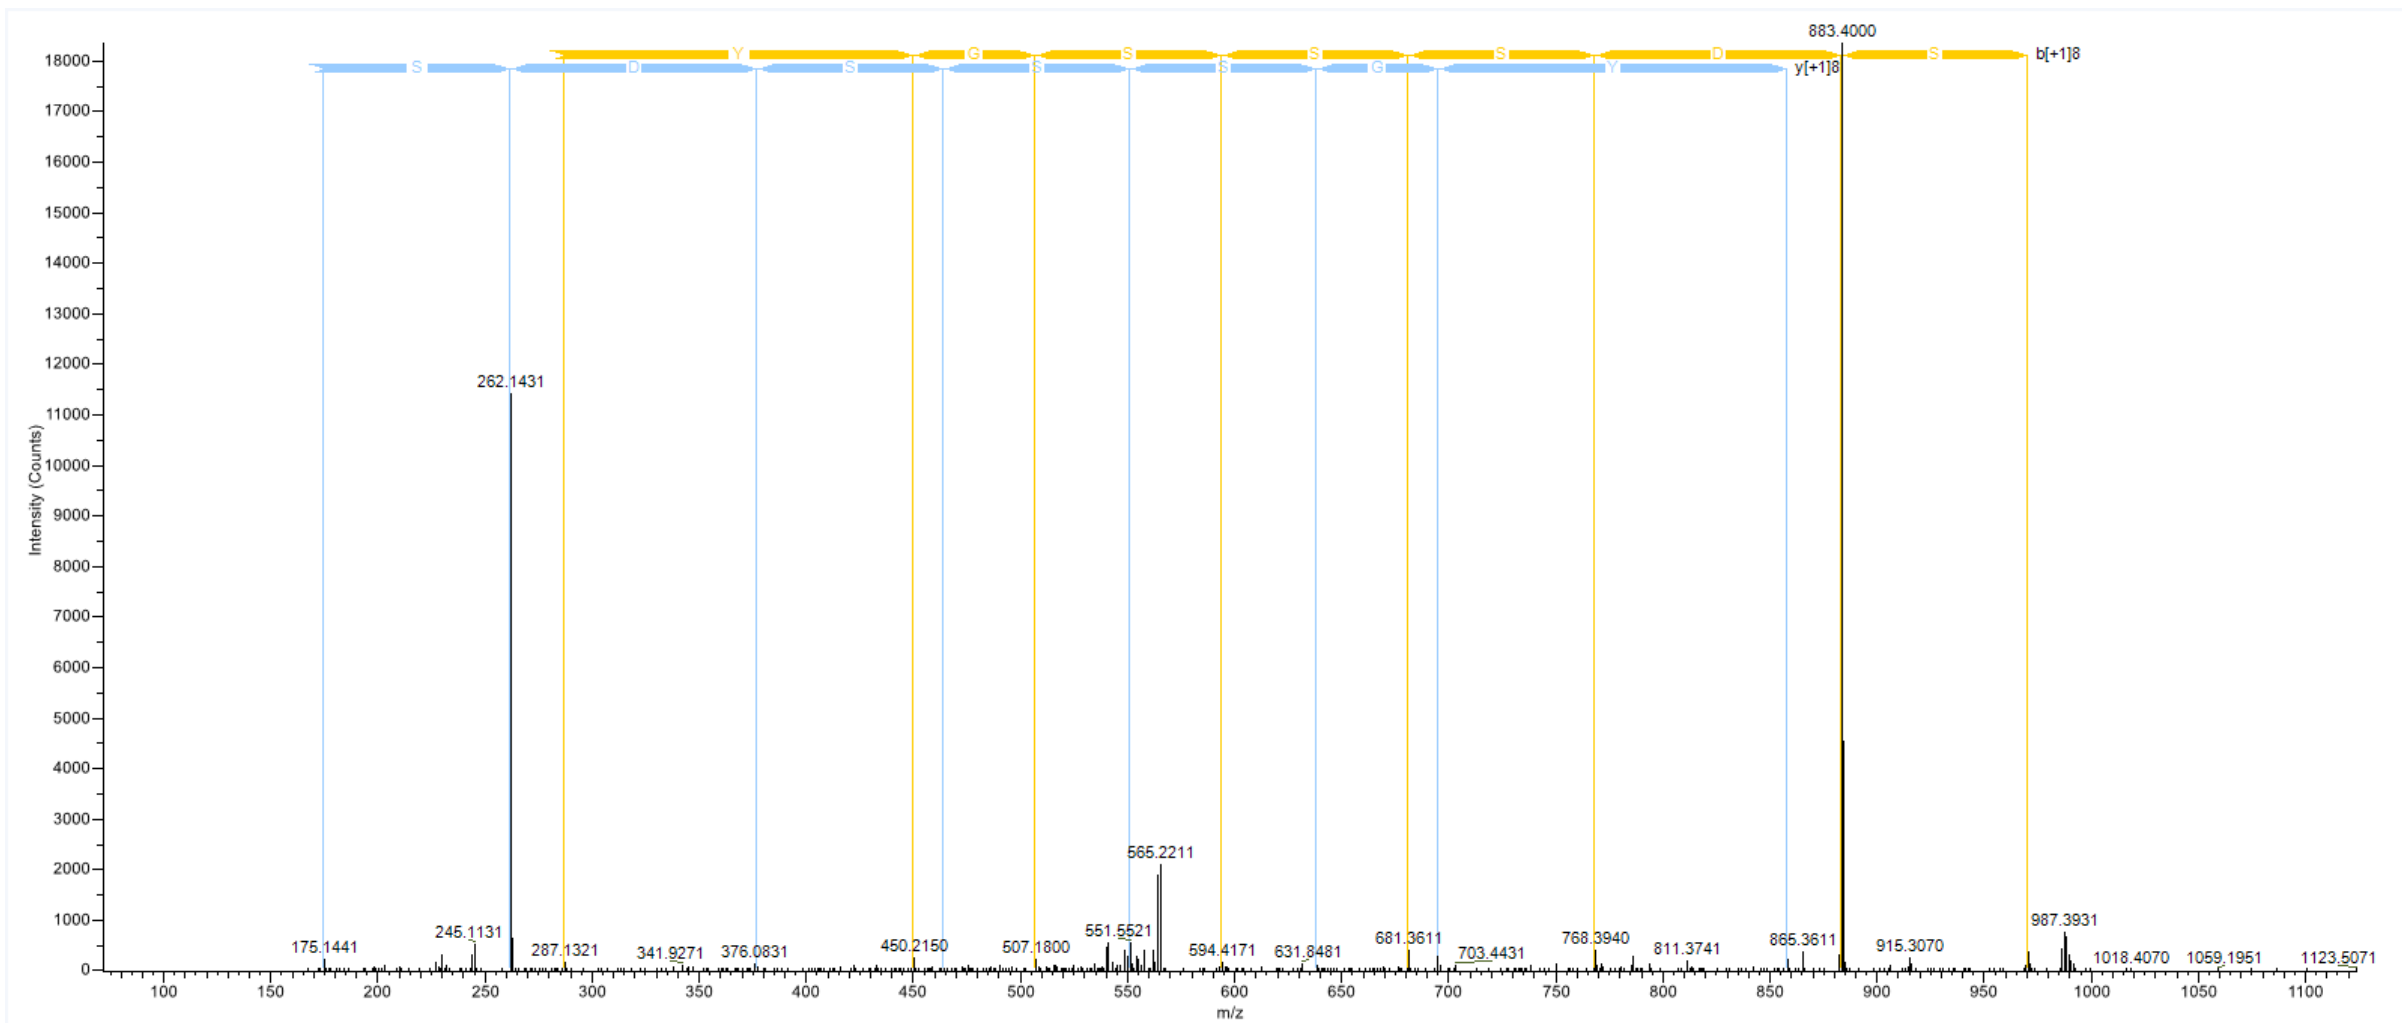

**g[Y]G[S]S[S]D[S]R**

Sequence: HLPGADPELVLLSR, H1-TMT6plex (229.16293 Da)

Charge: +3, Monoisotopic m/z: 582.67499 Da (-0.24 mmu/-0.42 ppm), MH+: 1746.01041 Da, RT: 128.1839 min,

Identified with: Sequest HT (v1.17); XCorr:4.50, Percolator q-Value:2.5e-5, Percolator PEP:1.1e-4, Ions matched by search engine: 0/0

Fragment match tolerance used for search: 0.6 Da

Fragments used for search: b; b-H<sub>2</sub>O; y; y-H<sub>2</sub>O; y-NH<sub>3</sub>

Protein references (1): Selenoprotein M OS=Mus musculus OX=10090 GN=Selenom PE=1 SV=3

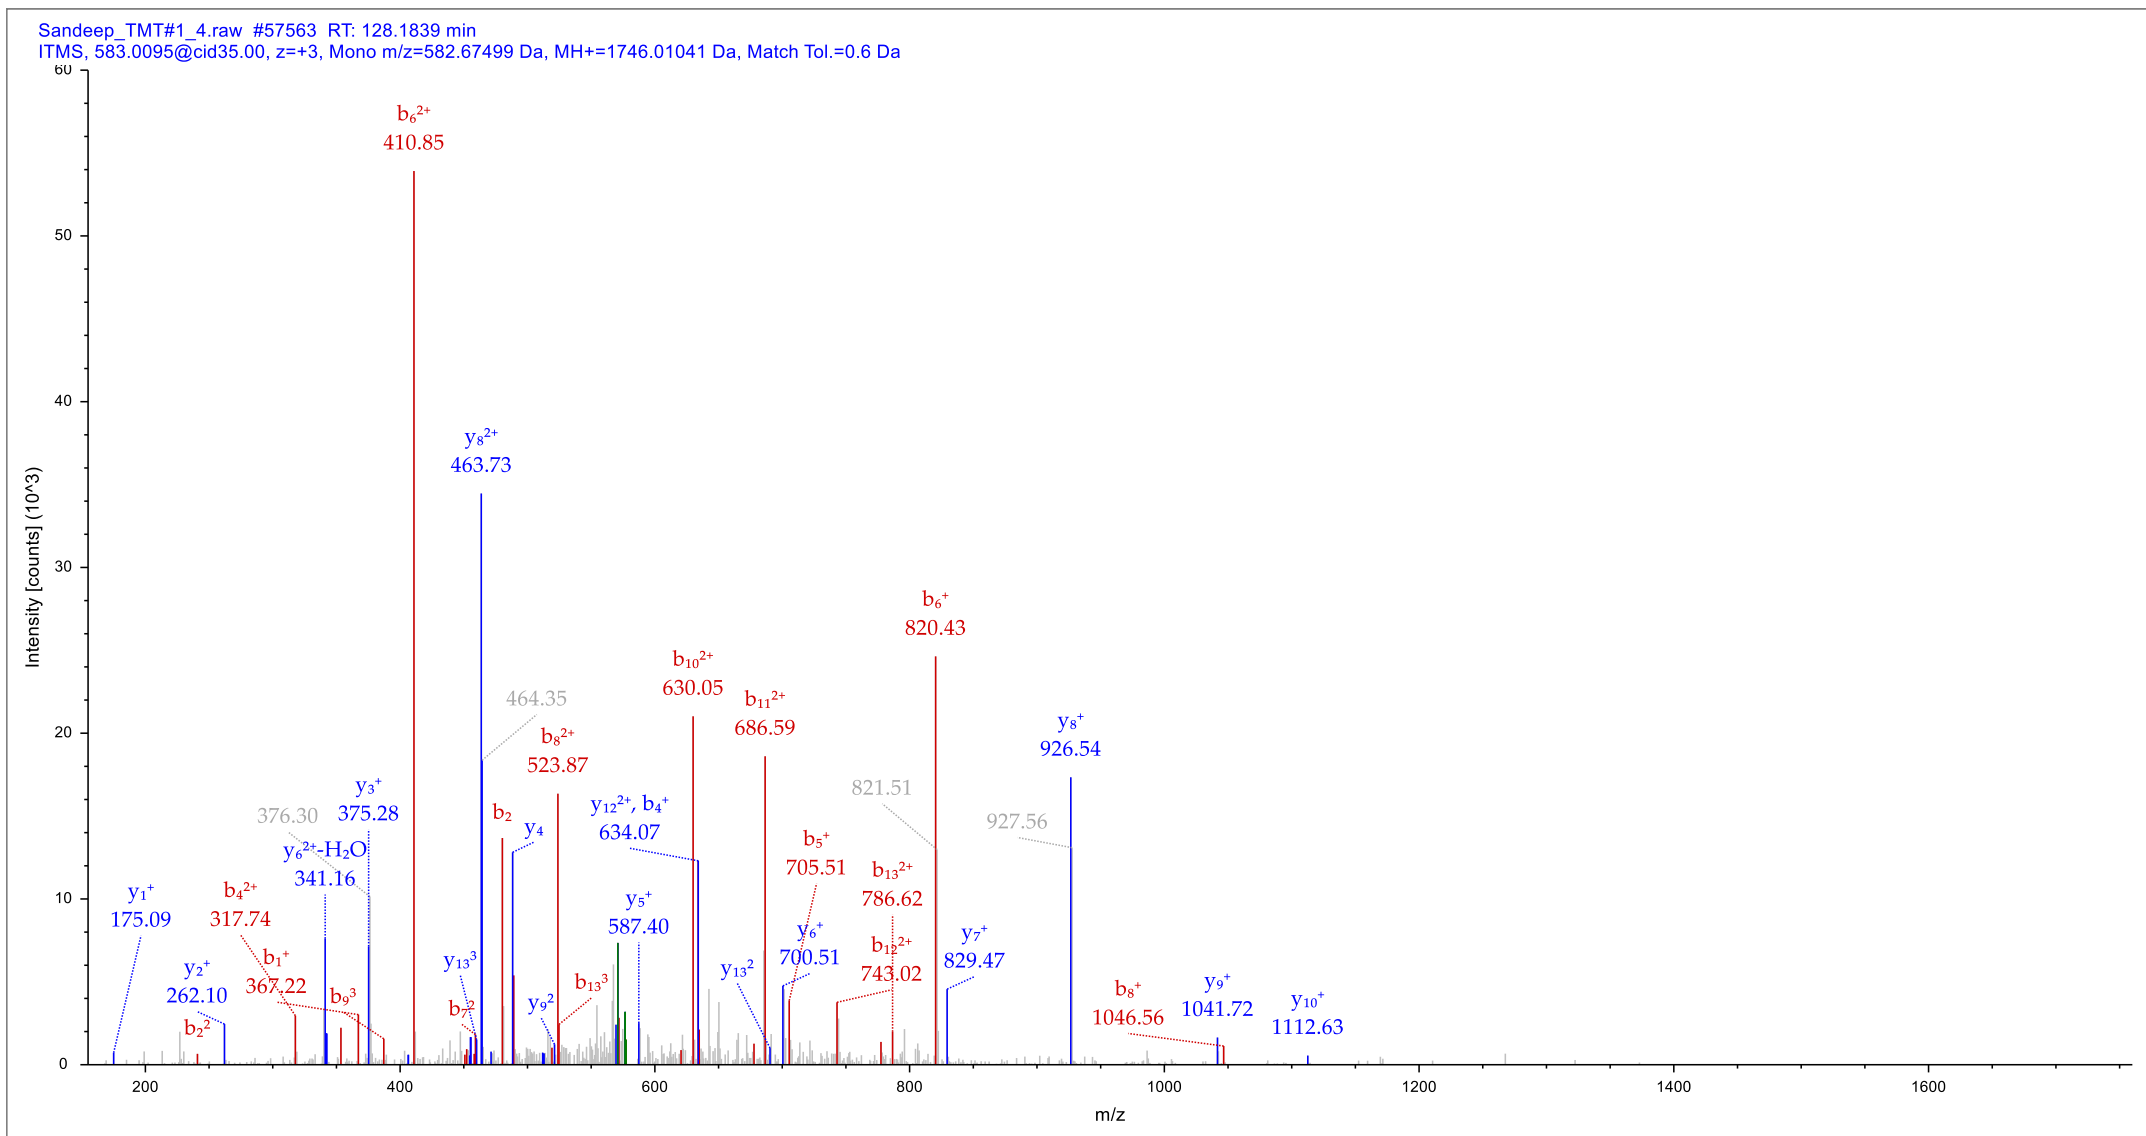

# Peptide consensus view

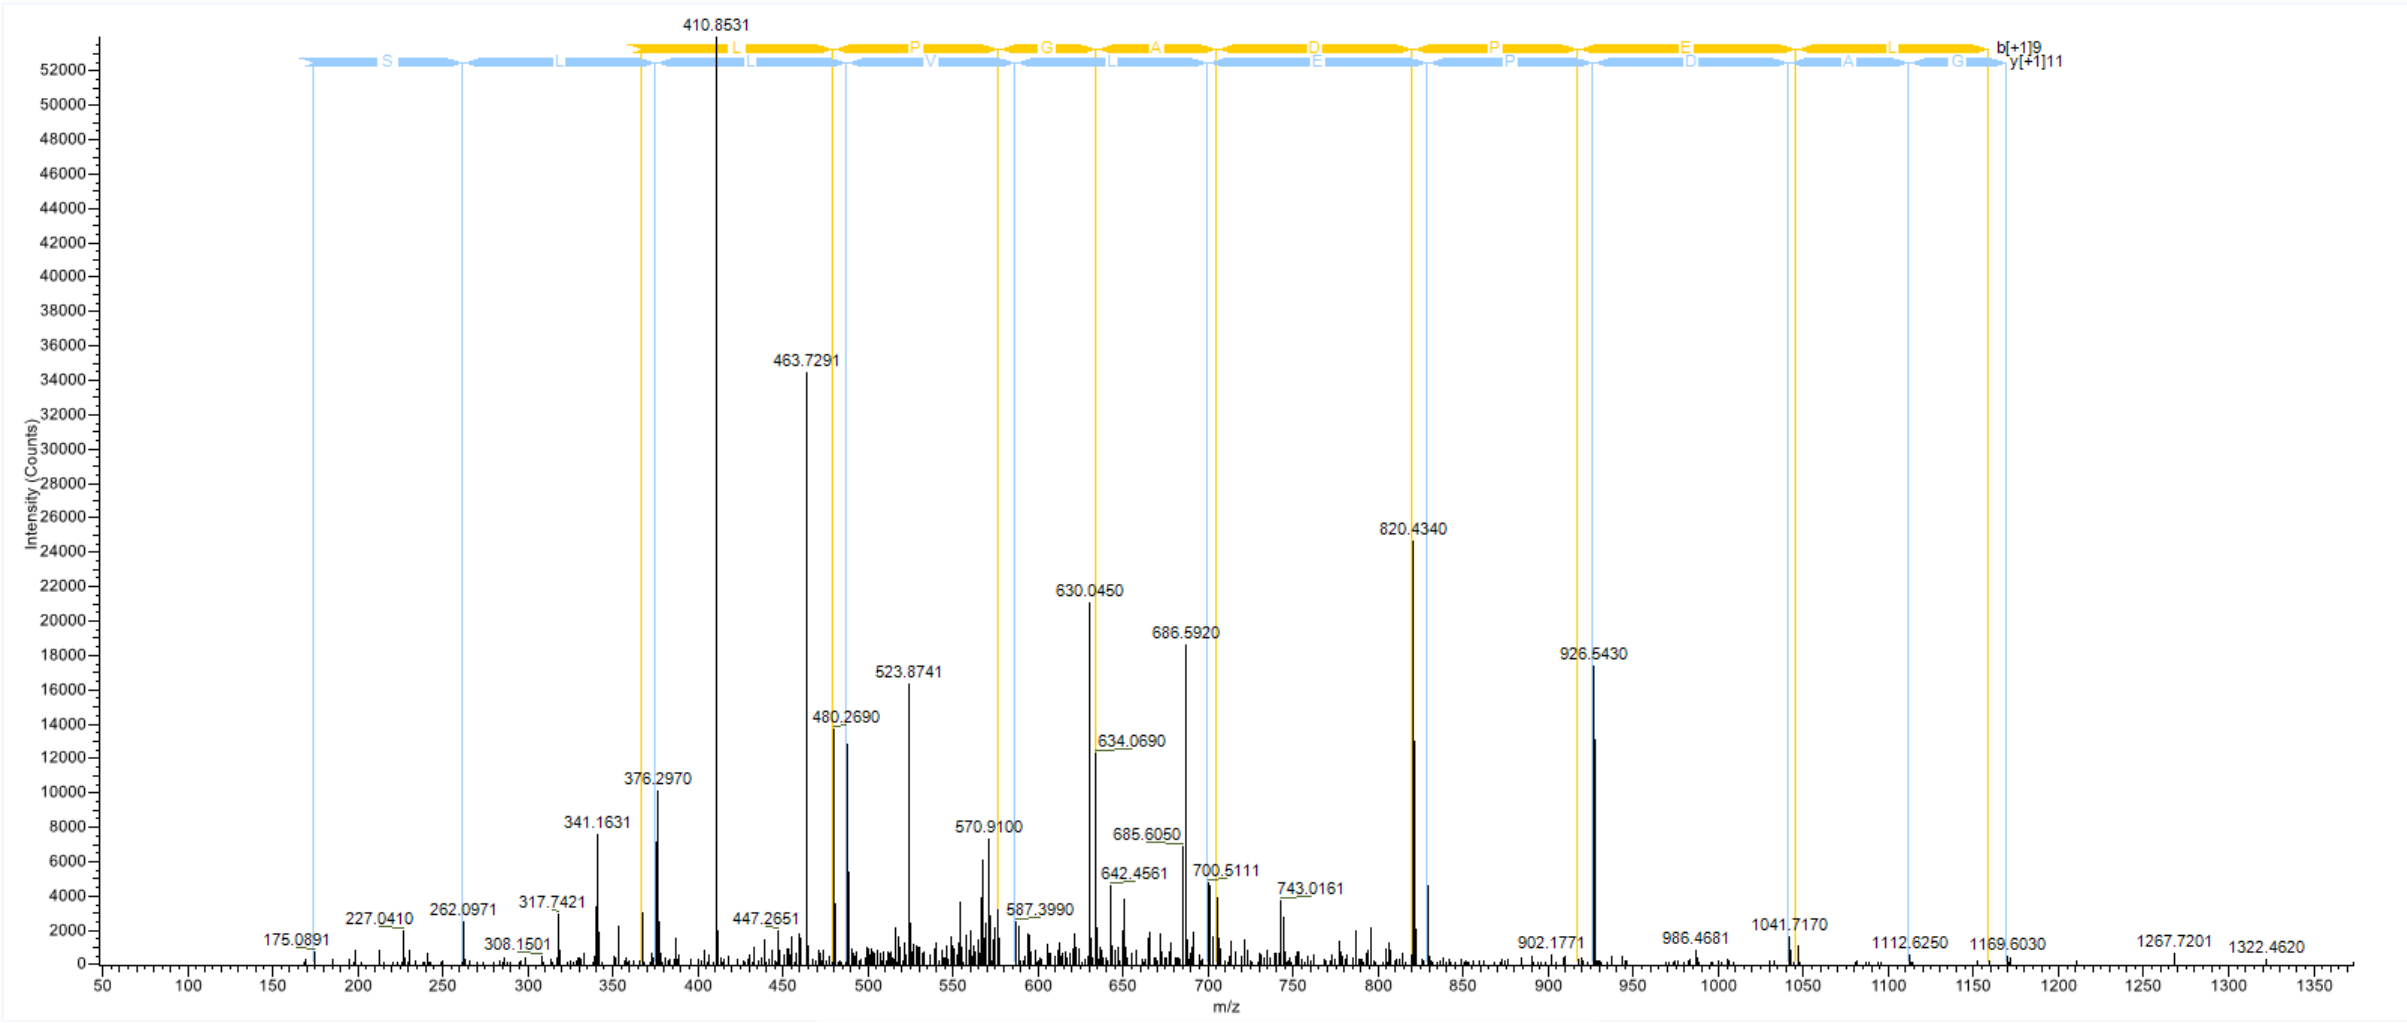

**h L P G A D P E L V L L S R**

Sequence: QLAGLHLEK, K9-TMT6plex (229.16293 Da), Q1-TMT6plex (229.16293 Da)

Charge: +3, Monoisotopic m/z: 489.64145 Da (+0.09 mmu/+0.19 ppm), MH+: 1466.90979 Da, RT: 94.9885 min,

Identified with: Sequest HT (v1.17); XCorr:3.00, Percolator q-Value:8.5e-5, Percolator PEP:4.5e-4, Ions matched by search engine: 0/0

Fragment match tolerance used for search: 0.6 Da

Fragments used for search: b; b-H<sub>2</sub>O; b-NH<sub>3</sub>; y; y-H<sub>2</sub>O; y-NH<sub>3</sub>

Protein references (1): Selenoprotein N OS=Mus musculus OX=10090 GN=Selenon PE=3 SV=2

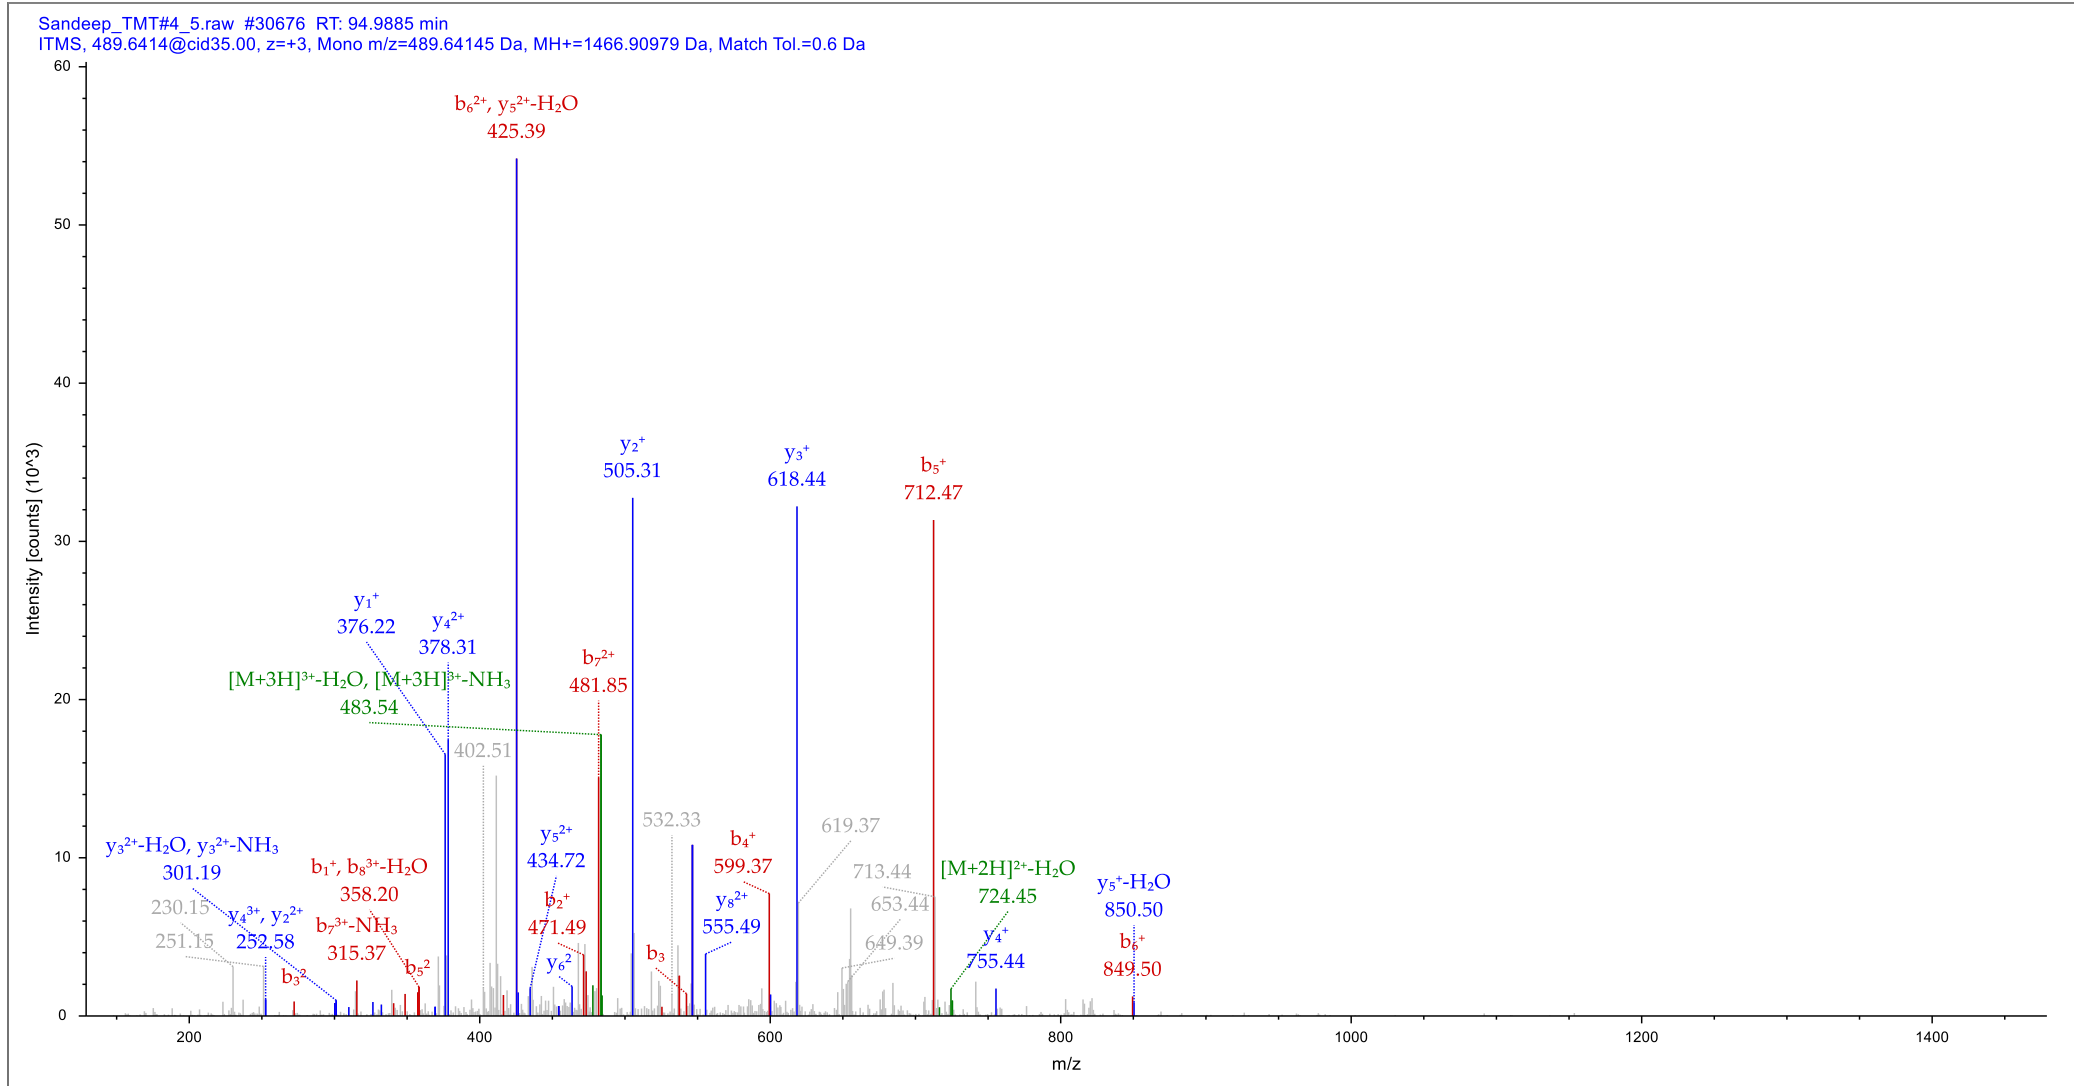



## Peptide consensus view

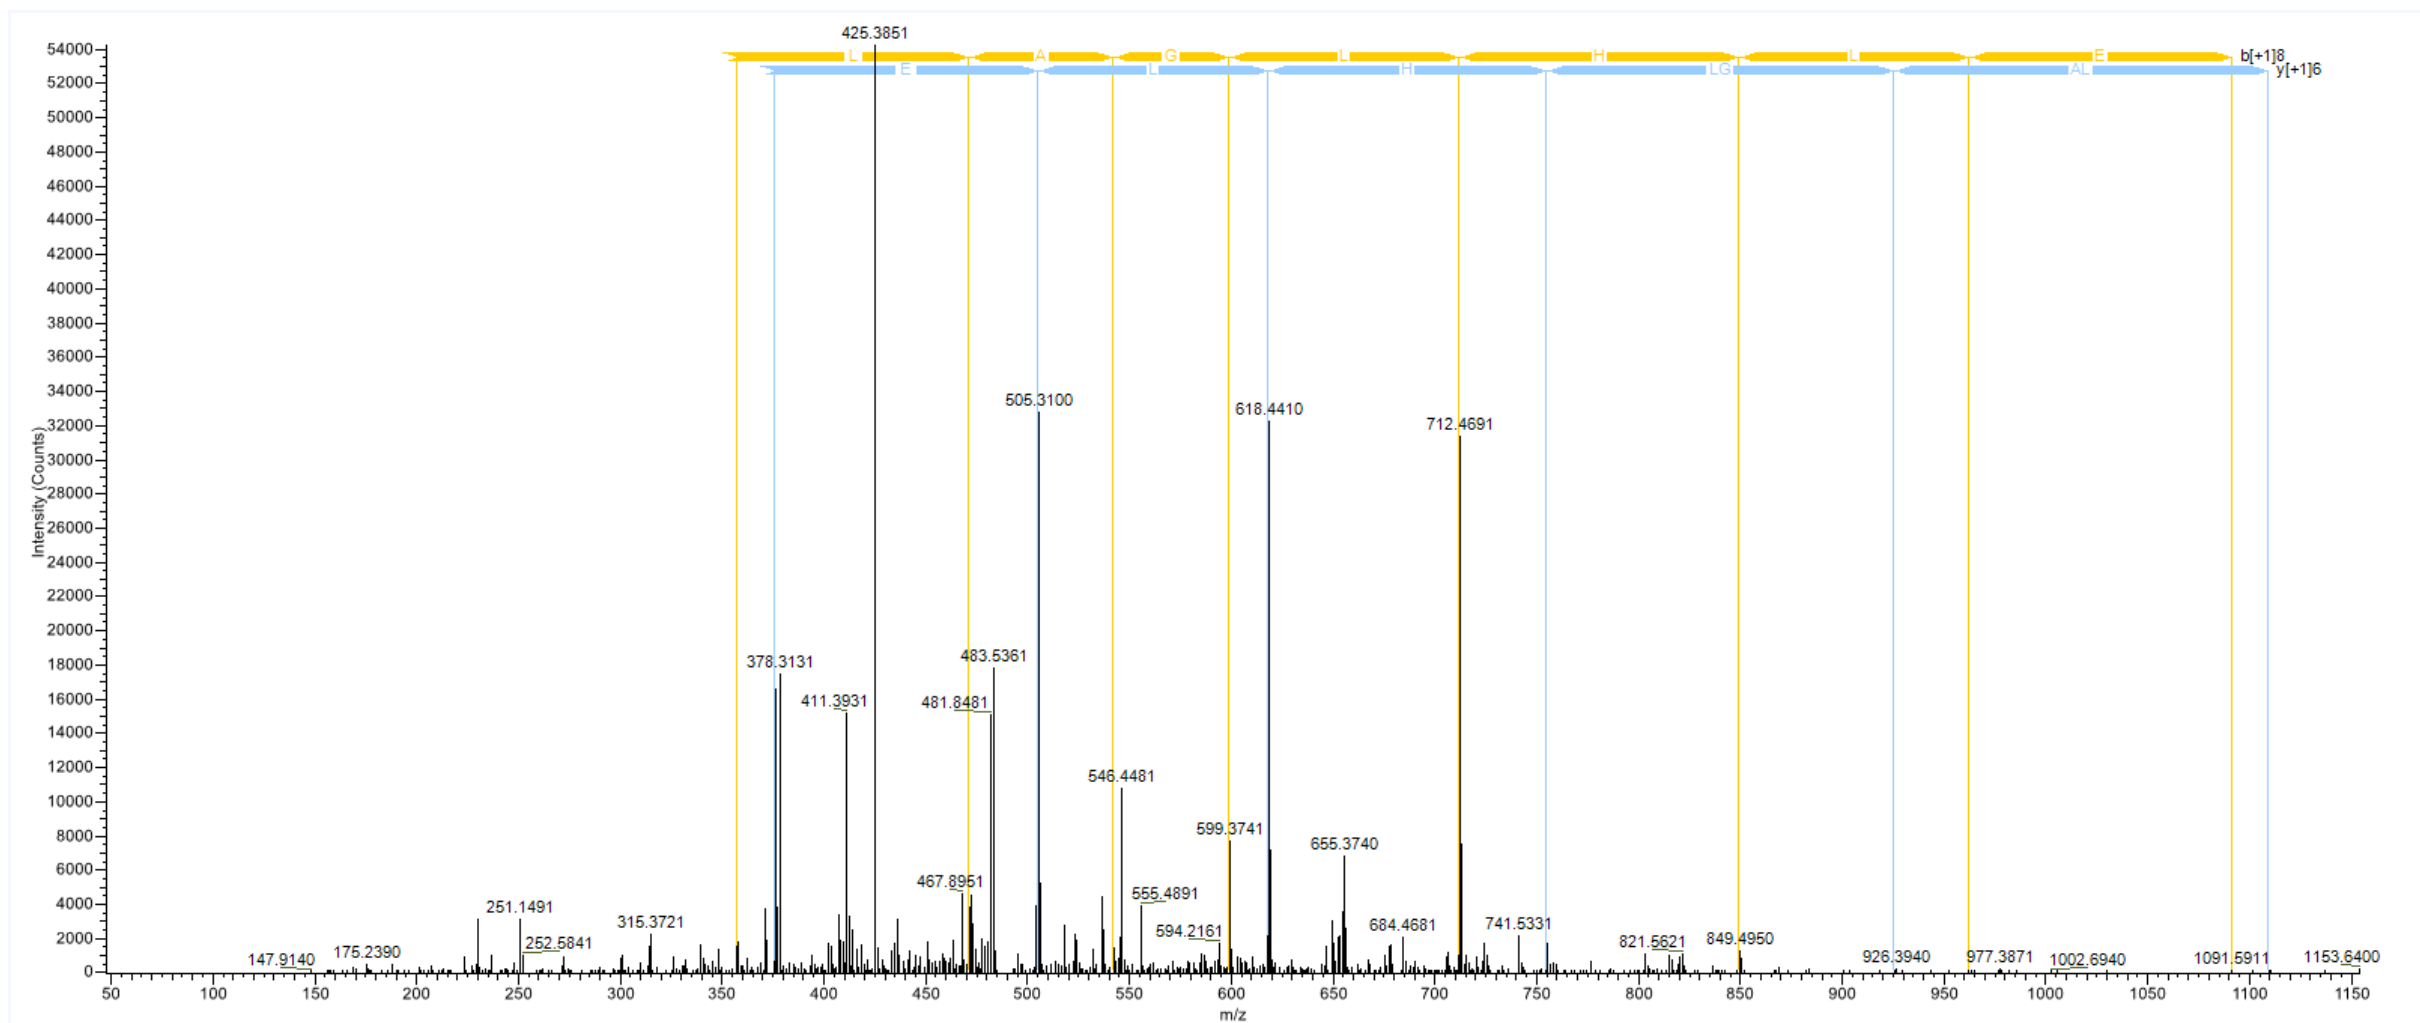

**q** [L] [A] [G] [L] [H] [L] [E] **k**

Sequence: LPSGEPLQVFEEIK, K15-TMT6plex (229.16293 Da), L1-TMT6plex (229.16293 Da)  
 Charge: +3, Monoisotopic m/z: 731.08563 Da (+0.29 mmu/+0.4 ppm), MH+: 2191.24234 Da, RT: 143.8881 min,  
 Identified with: Sequest HT (v1.17); XCorr:2.87, Percolator q-Value:3.7e-4, Percolator PEP:2.3e-3, Ions matched by search  
 engine: 0/0

Fragment match tolerance used for search: 0.6 Da

Fragments used for search: b; b-H<sub>2</sub>O; b-NH<sub>3</sub>; y; y-H<sub>2</sub>O; y-NH<sub>3</sub>

Protein references (1): Selenoprotein N OS=Mus musculus OX=10090 GN=Selenon PE=3 SV=2

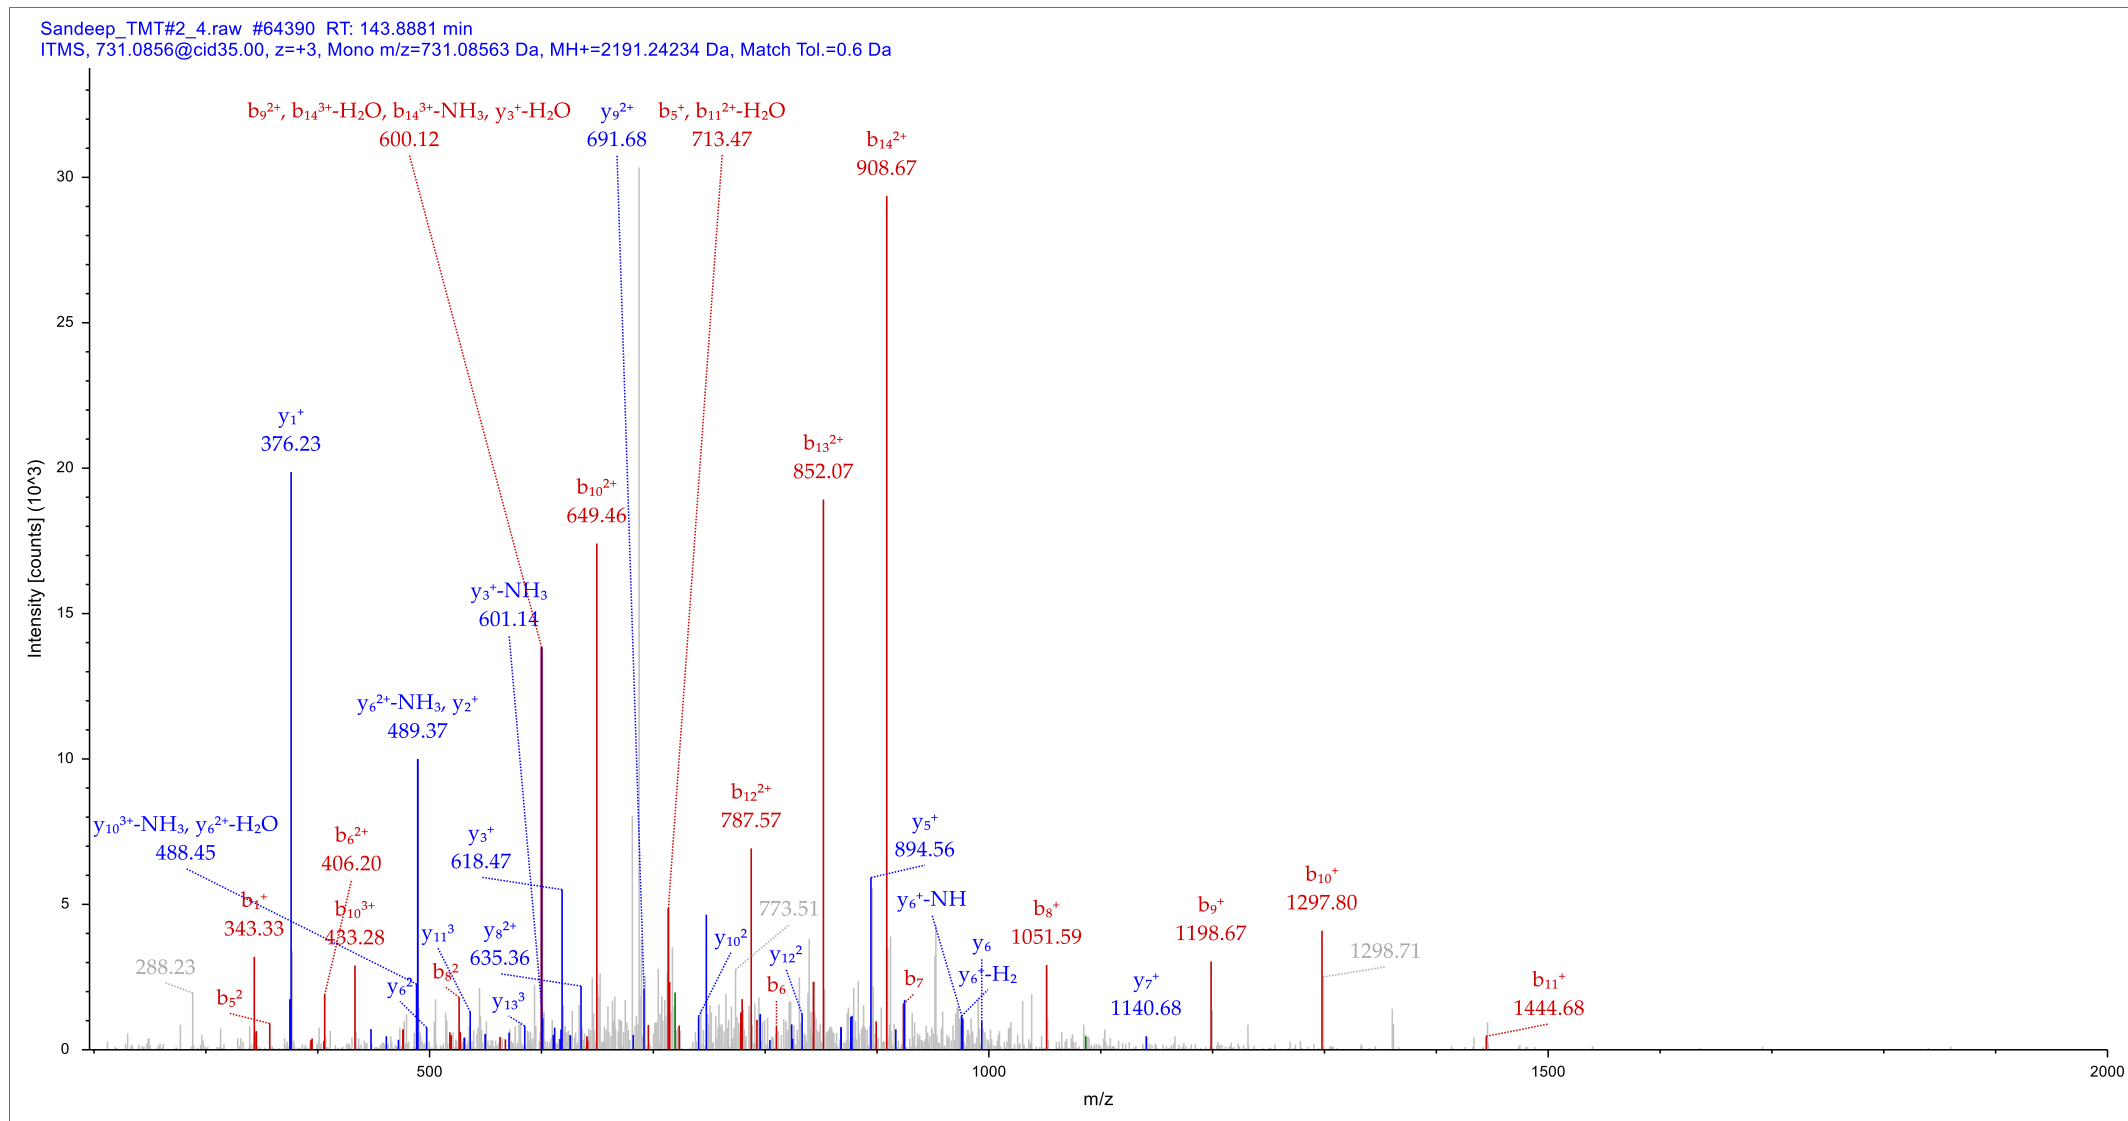

## Peptide consensus view

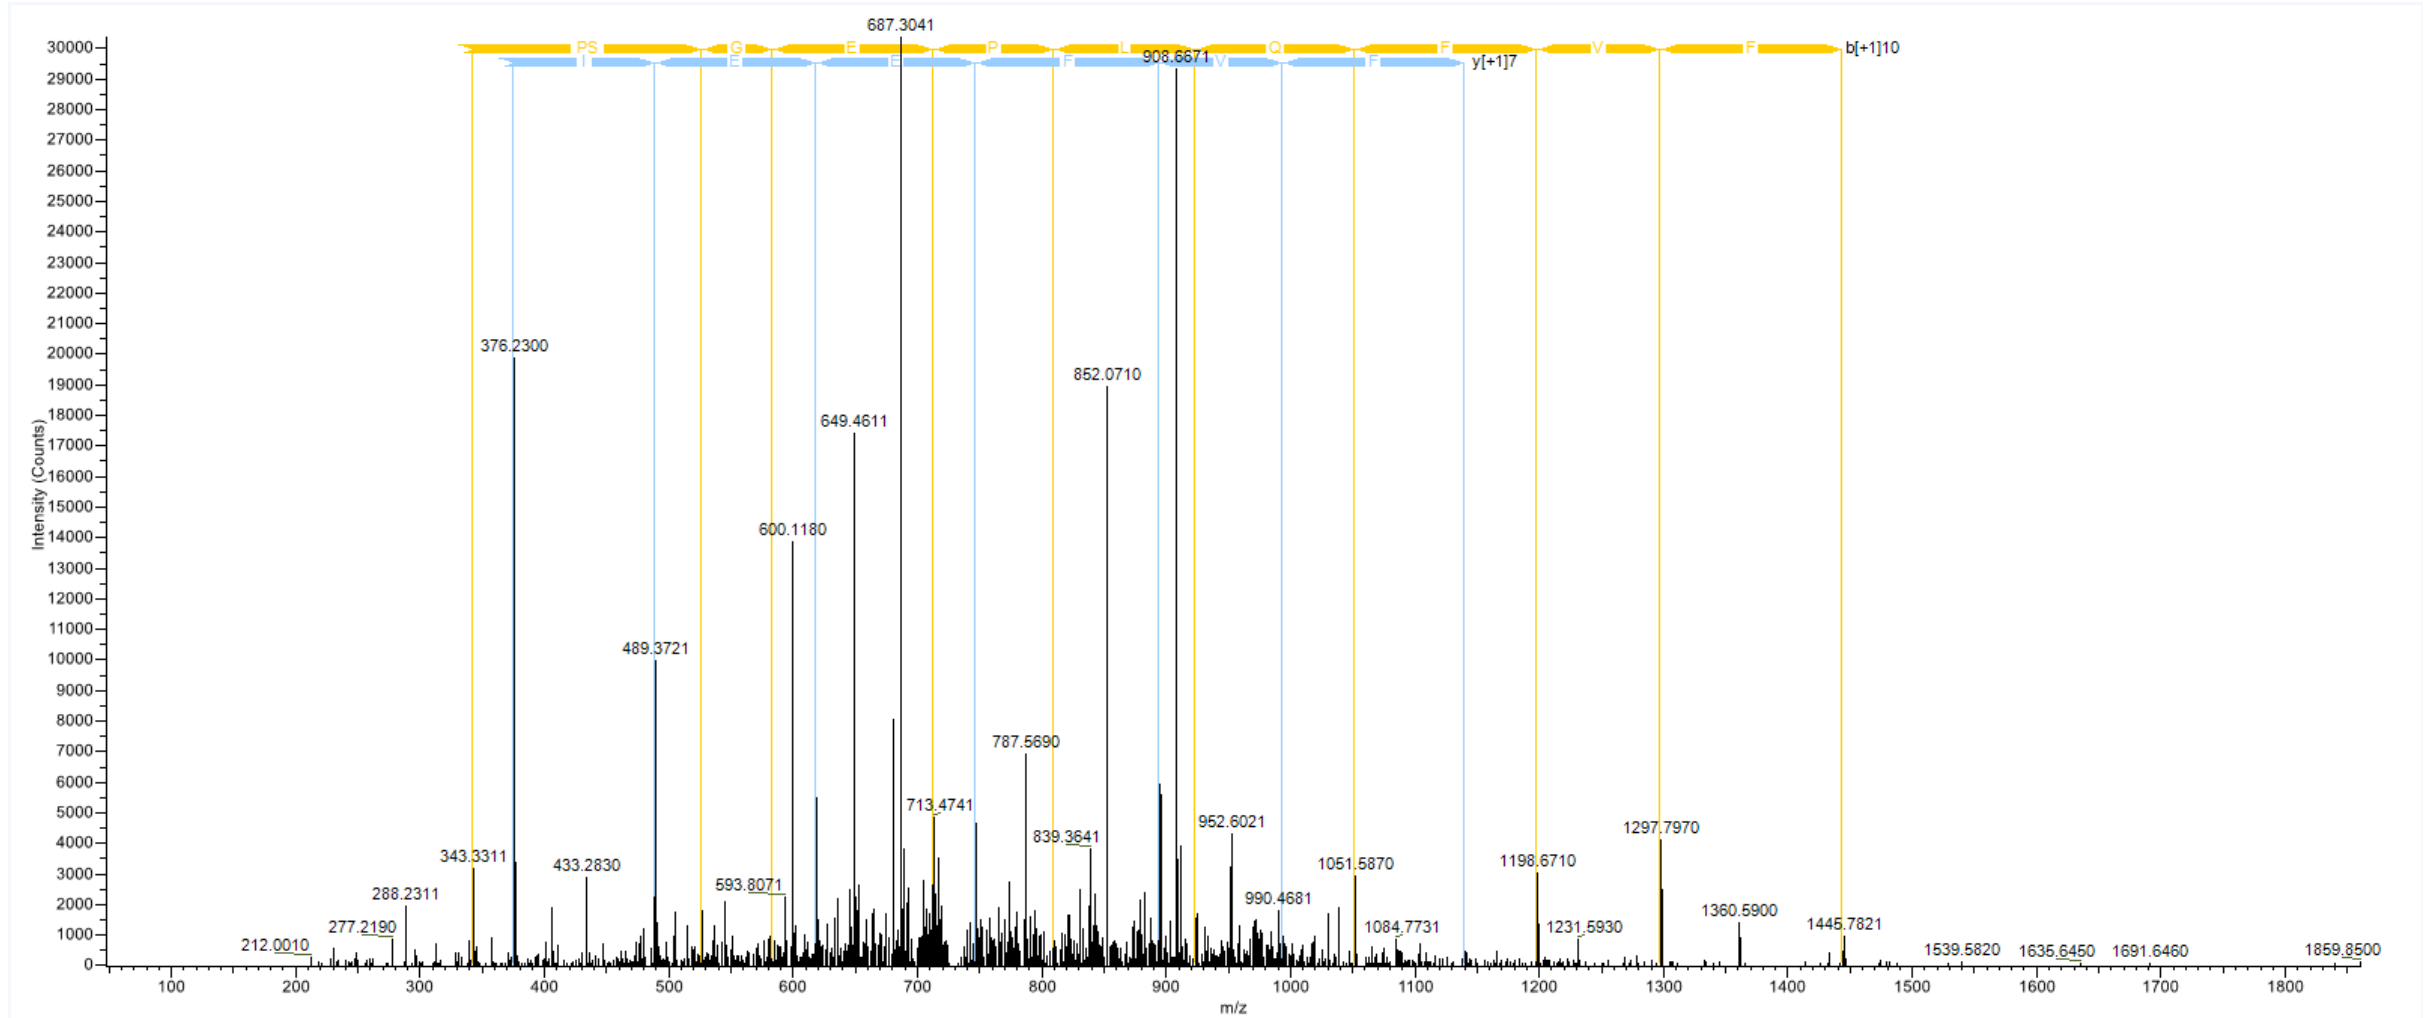

Sequence: NSGRPQEEDGPGPSTSSVIPK, K21-TMT6plex (229.16293 Da), N1-TMT6plex (229.16293 Da)  
 Charge: +3, Monoisotopic m/z: 866.45581 Da (-1.42 mmu/-1.64 ppm), MH+: 2597.35288 Da, RT: 81.7033 min,  
 Identified with: Sequest HT (v1.17); XCorr:4.85, Percolator q-Value:0.0e0, Percolator PEP:5.4e-7, Ions matched by search engine: 0/0  
 Fragment match tolerance used for search: 0.6 Da  
 Fragments used for search: b; b-H<sub>2</sub>O; b-NH<sub>3</sub>; y; y-H<sub>2</sub>O; y-NH<sub>3</sub>  
 Protein references (1): Selenoprotein S OS=Mus musculus OX=10090 GN=Selenos PE=1 SV=3

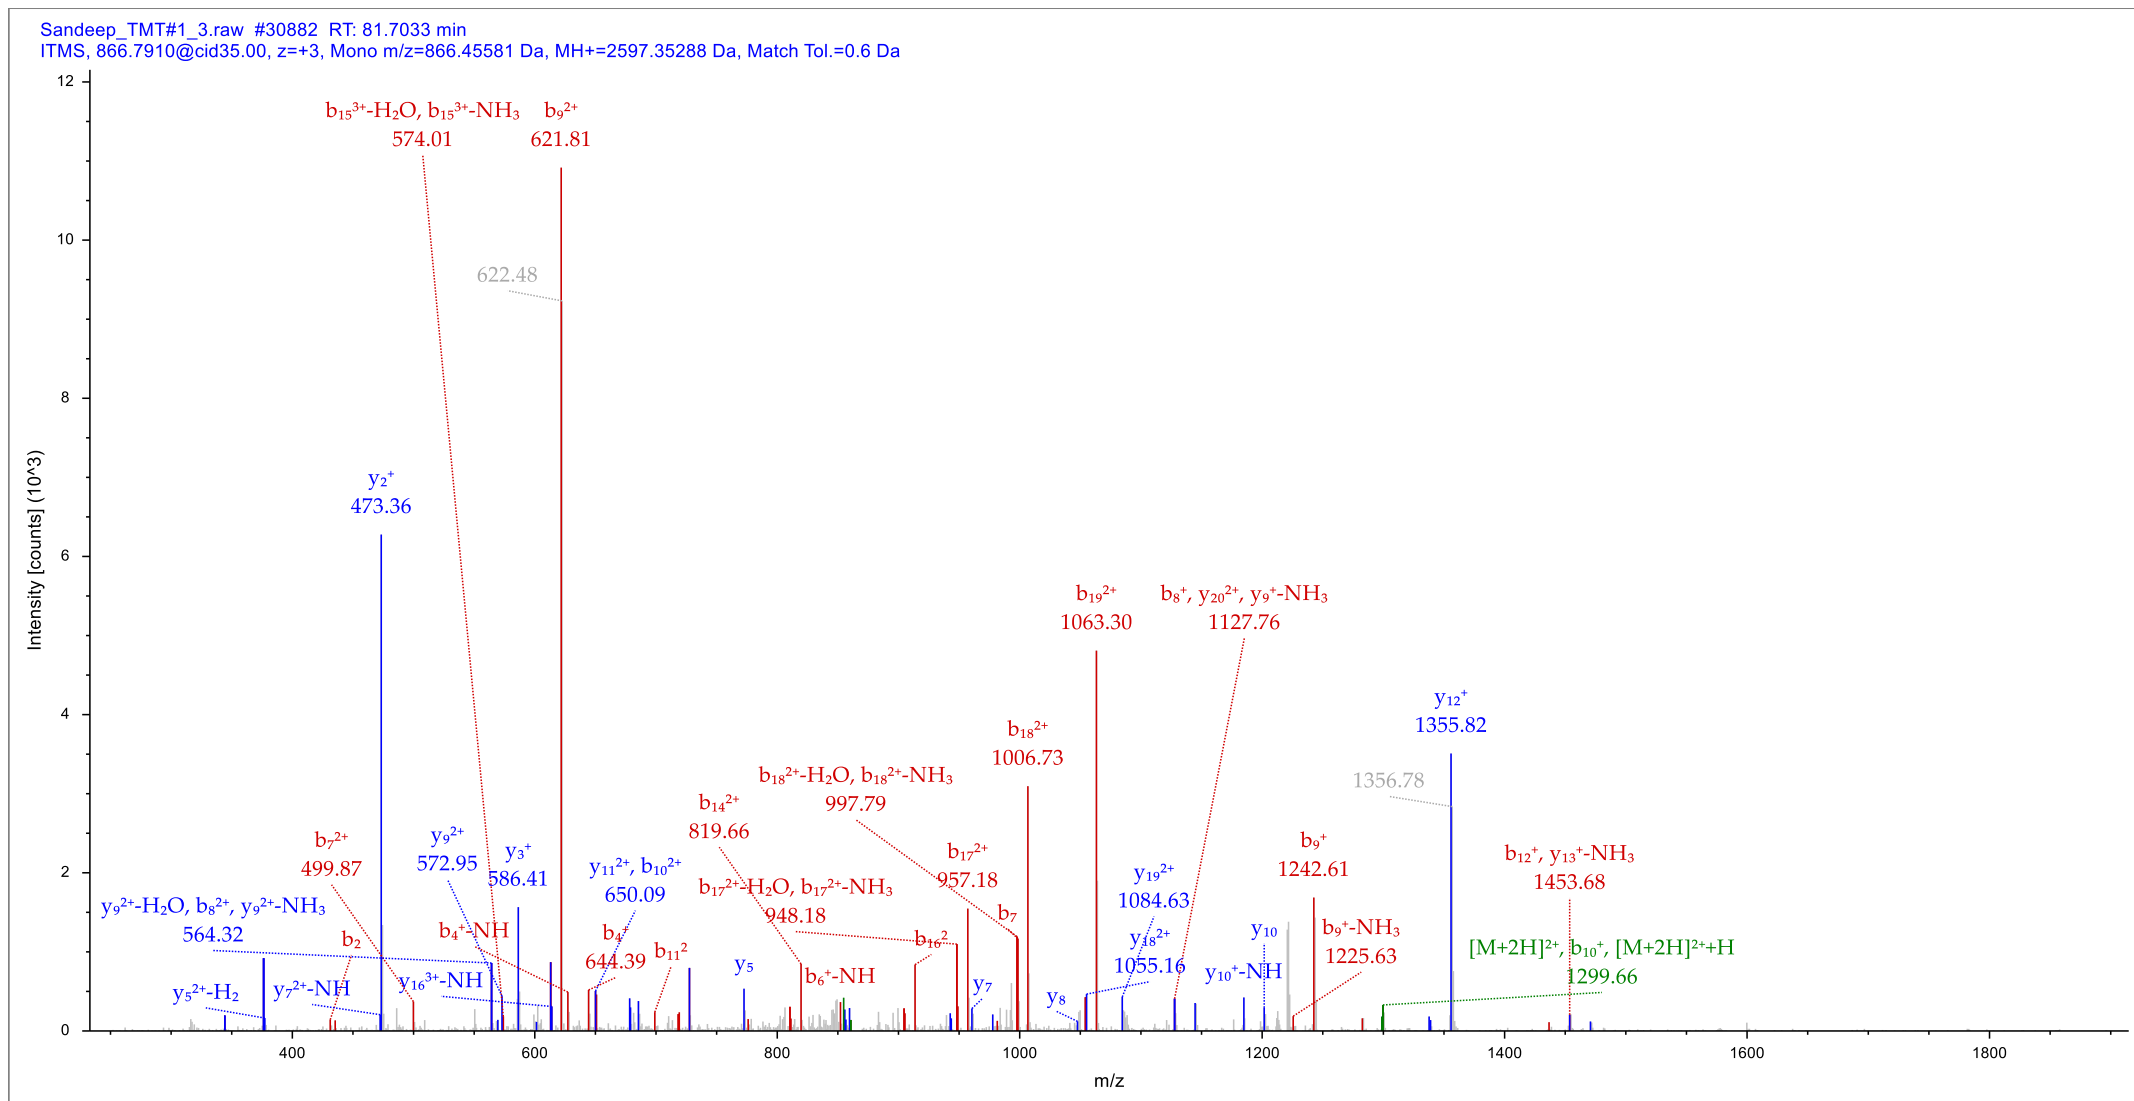

# Peptide consensus view

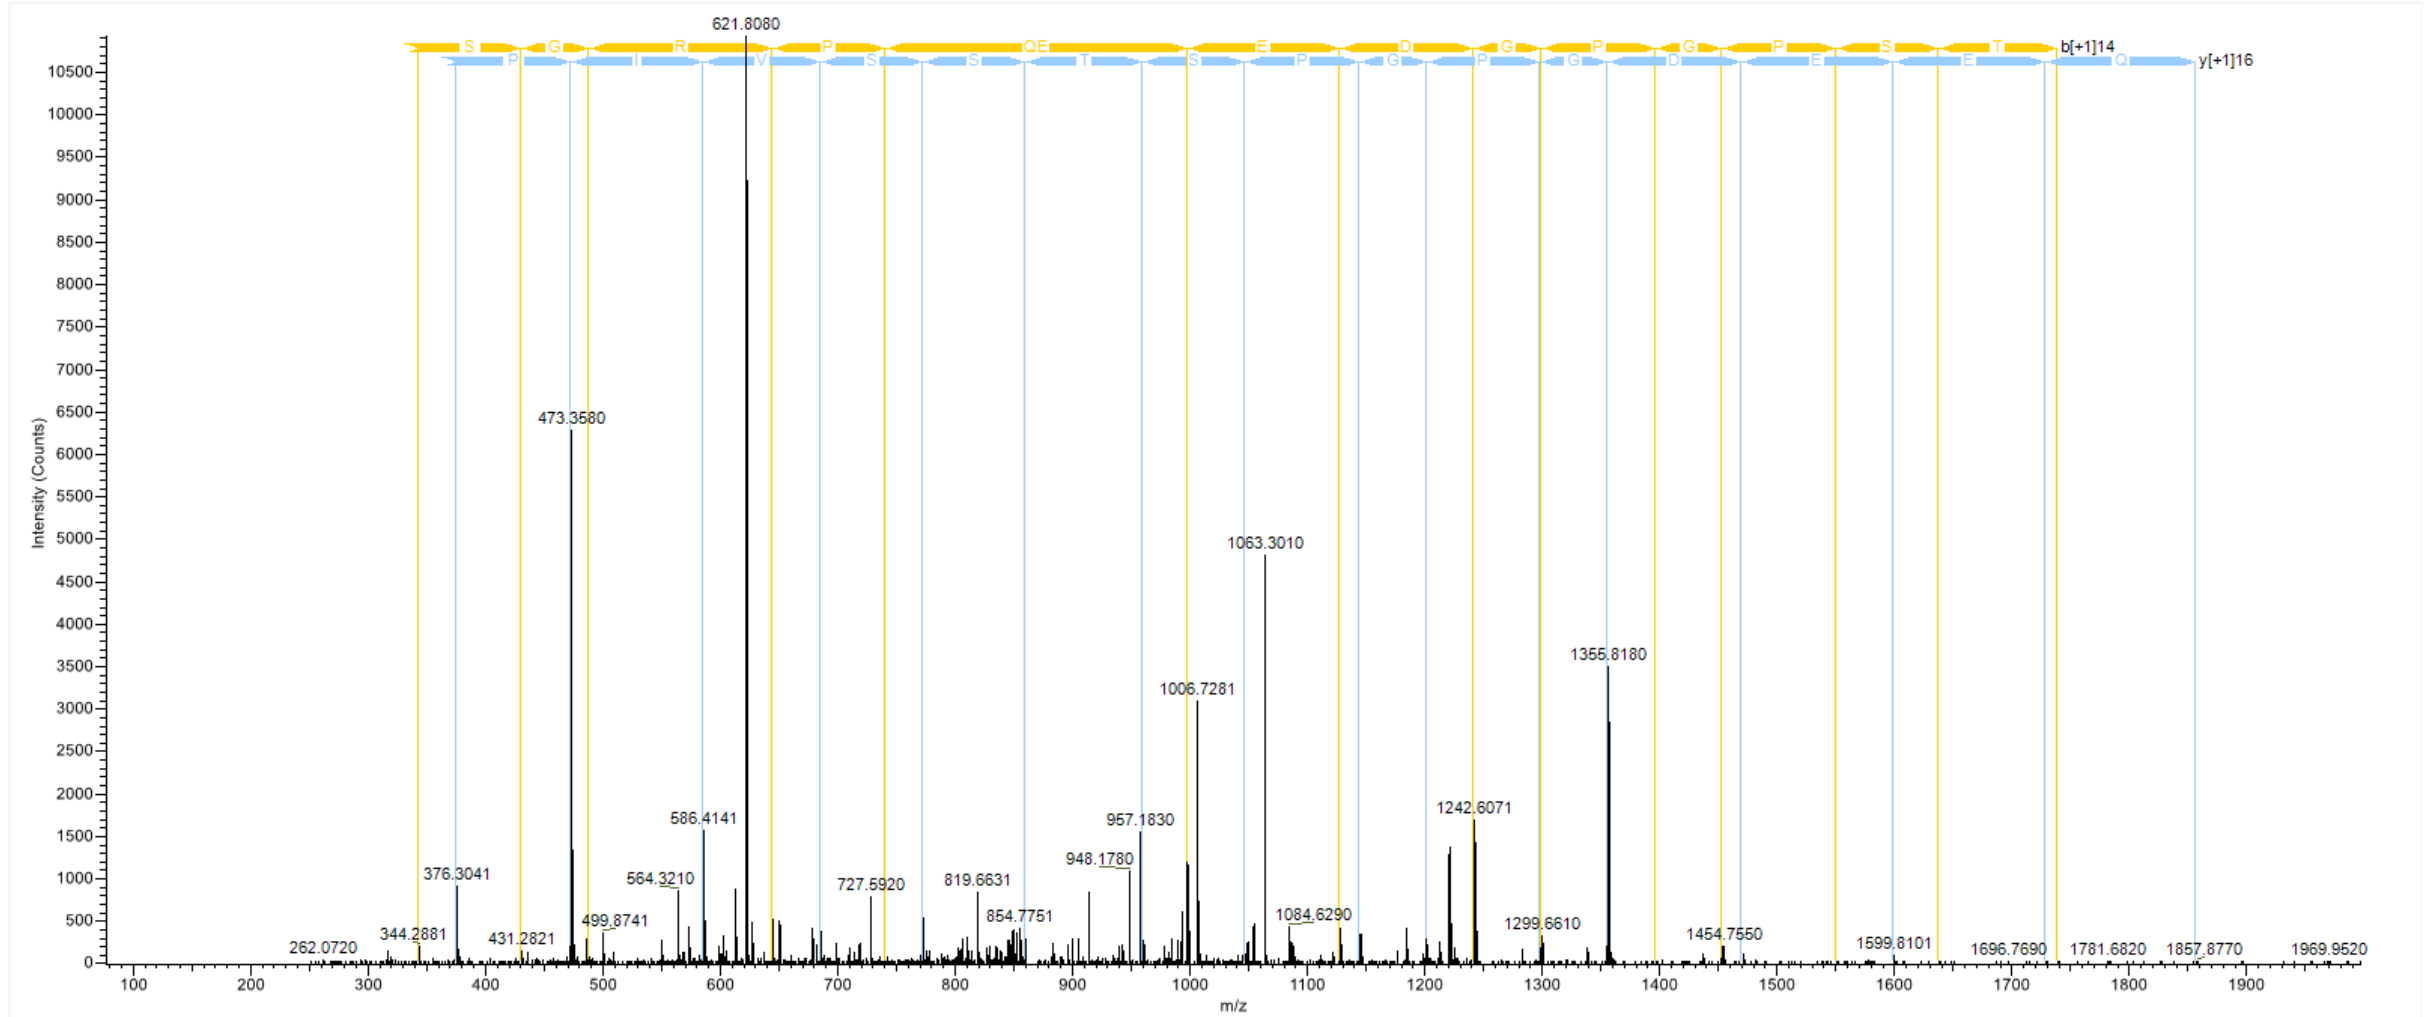

**n] S] G] R] P] Q] E] E] D] G] P] G] P] S] T] S] S] V] I] P] k**

Sequence: QLDQAETVLEPDVVVK, K16-TMT6plex (229.16293 Da), Q1-TMT6plex (229.16293 Da)  
 Charge: +3, Monoisotopic m/z: 747.76343 Da (+0.5 mmu/+0.67 ppm), MH+: 2241.27573 Da, RT: 132.4630 min,  
 Identified with: Sequest HT (v1.17); XCorr:4.22, Percolator q-Value:9.6e-4, Percolator PEP:6.8e-3, Ions matched by search engine: 0/0  
 Fragment match tolerance used for search: 0.6 Da  
 Fragments used for search: b; b-H<sub>2</sub>O; b-NH<sub>3</sub>; y; y-H<sub>2</sub>O; y-NH<sub>3</sub>  
 Protein references (1): Selenoprotein S OS=Mus musculus OX=10090 GN=Selenos PE=1 SV=3

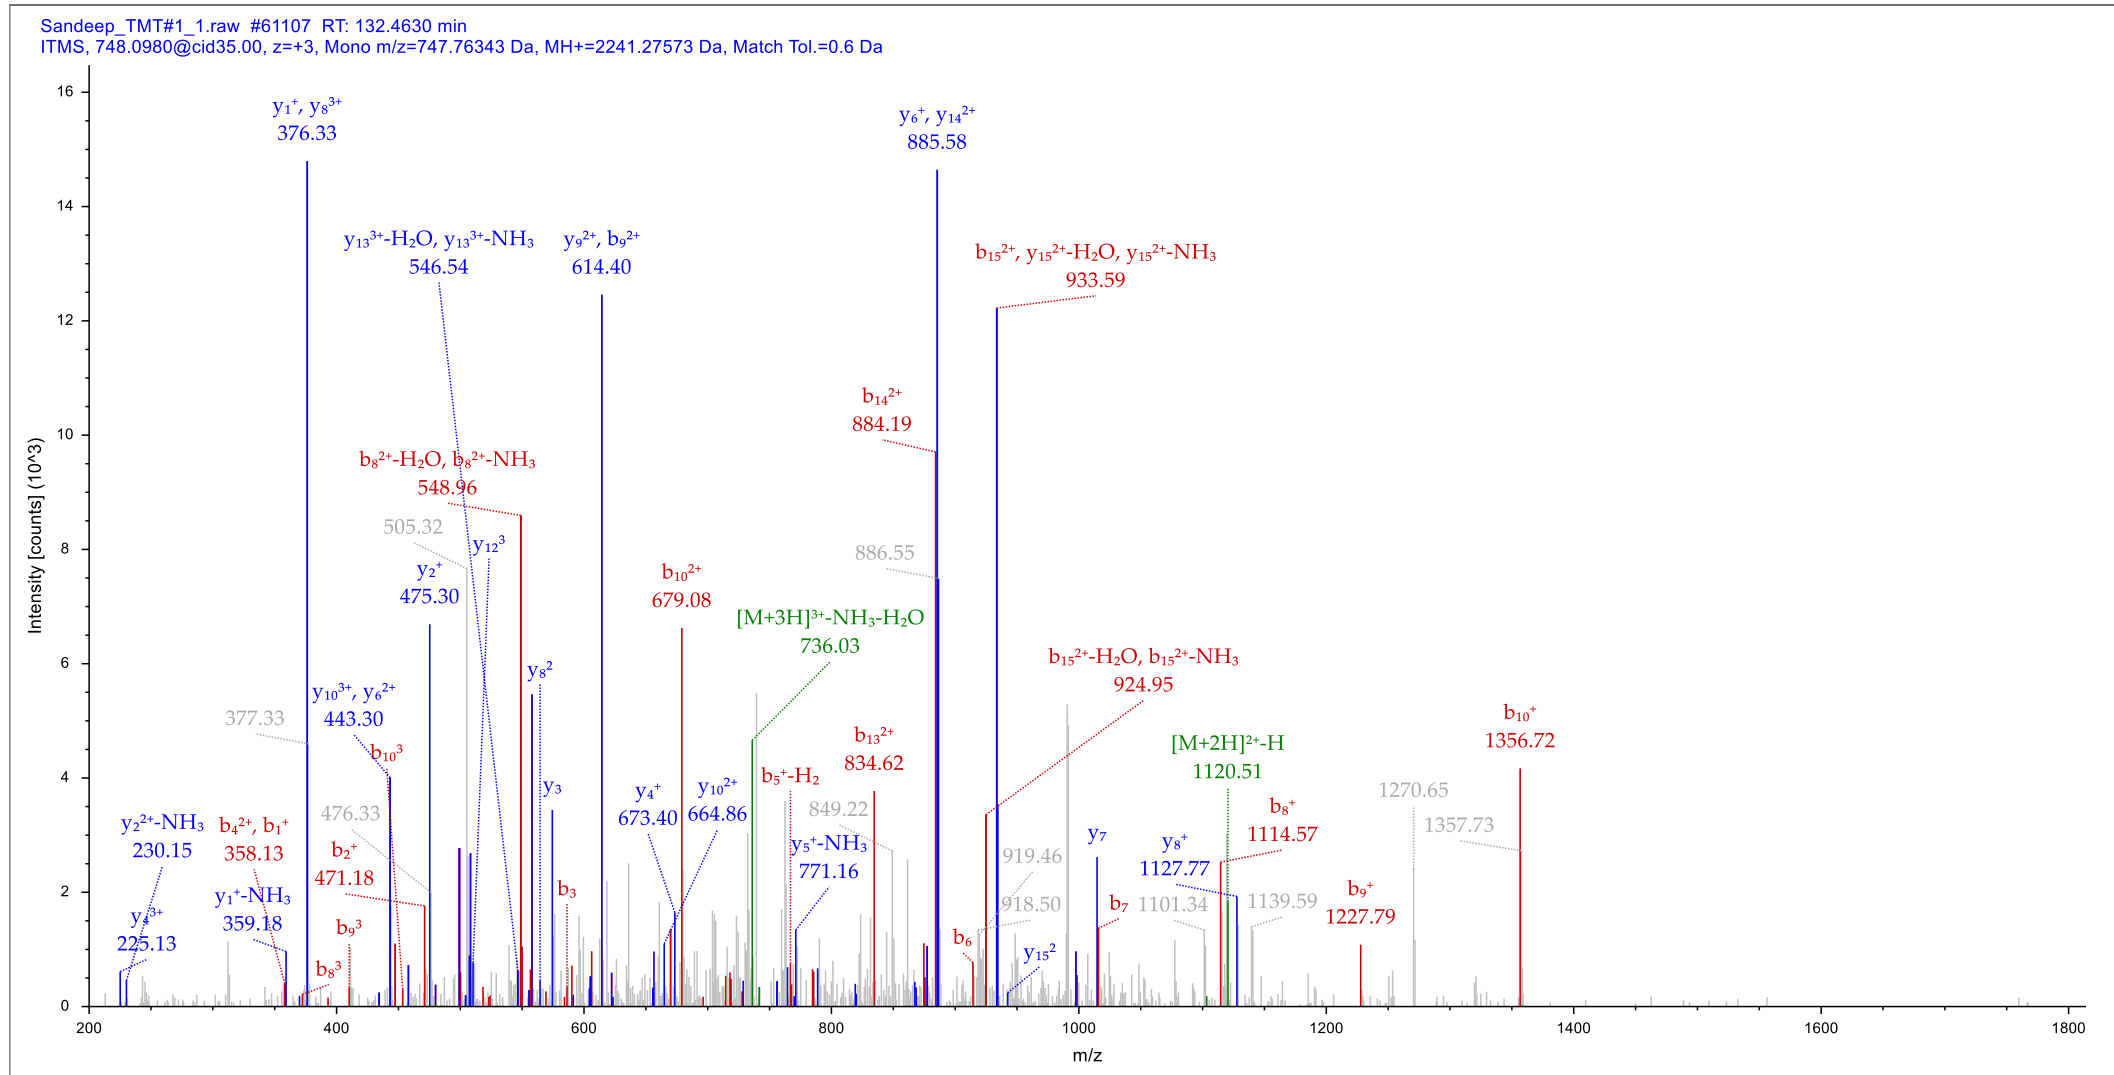

## Peptide consensus view

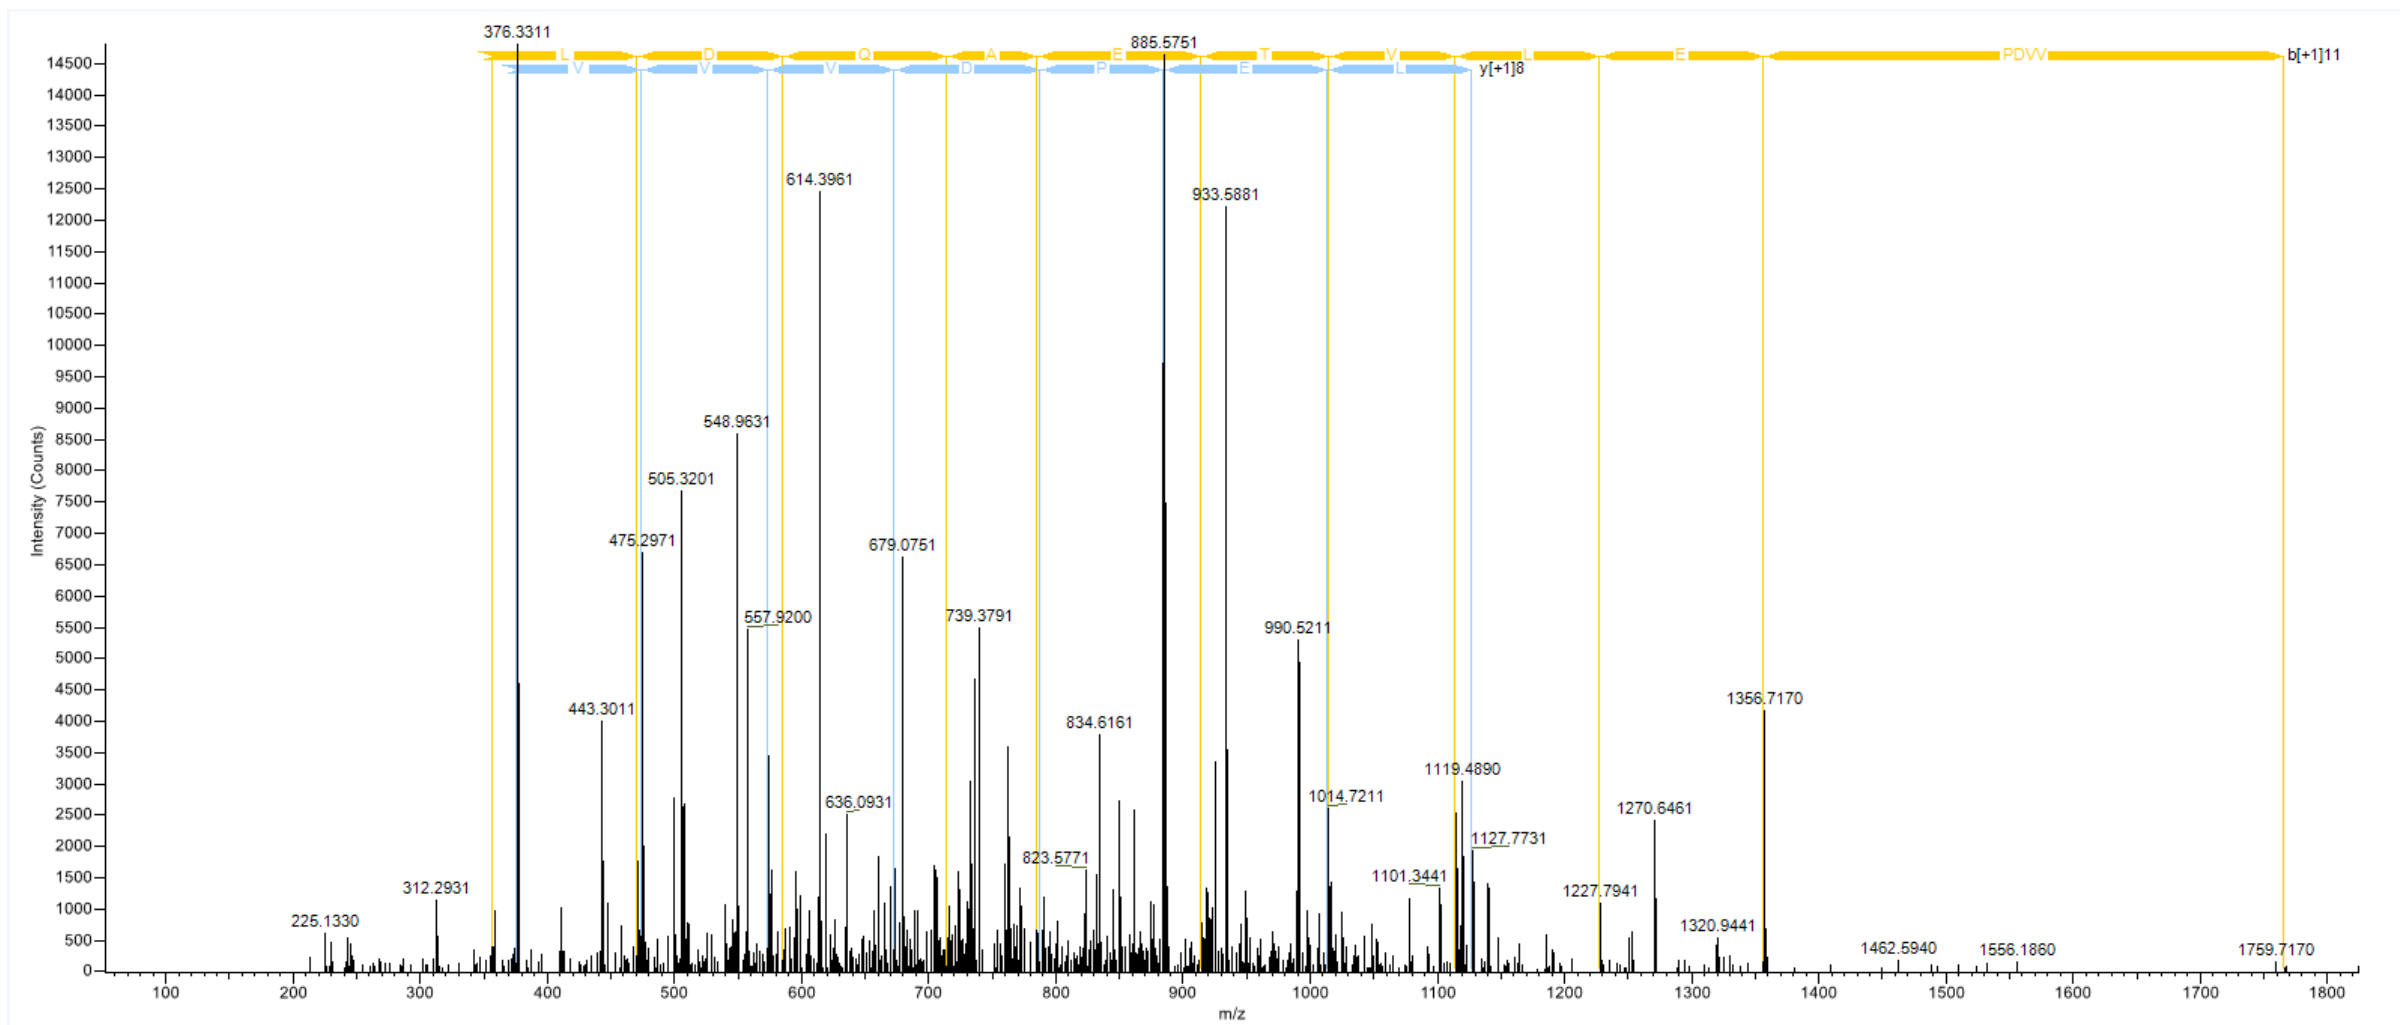

**q** L D Q A E T V L E P D V V V **k**

Sequence: RQEALAAAR, R1-TMT6plex (229.16293 Da)

Charge: +3, Monoisotopic m/z: 405.57690 Da (-0.18 mmu/-0.43 ppm), MH+: 1214.71616 Da, RT: 43.5866 min,

Identified with: Sequest HT (v1.17); XCorr:4.19, Percolator q-Value:0.0e0, Percolator PEP:1.1e-4, Ions matched by search engine: 0/0

Fragment match tolerance used for search: 0.6 Da

Fragments used for search: b; b-H<sub>2</sub>O; b-NH<sub>3</sub>; y; y-H<sub>2</sub>O; y-NH<sub>3</sub>

Protein references (1): Selenoprotein S OS=Mus musculus OX=10090 GN=Selenos PE=1 SV=3

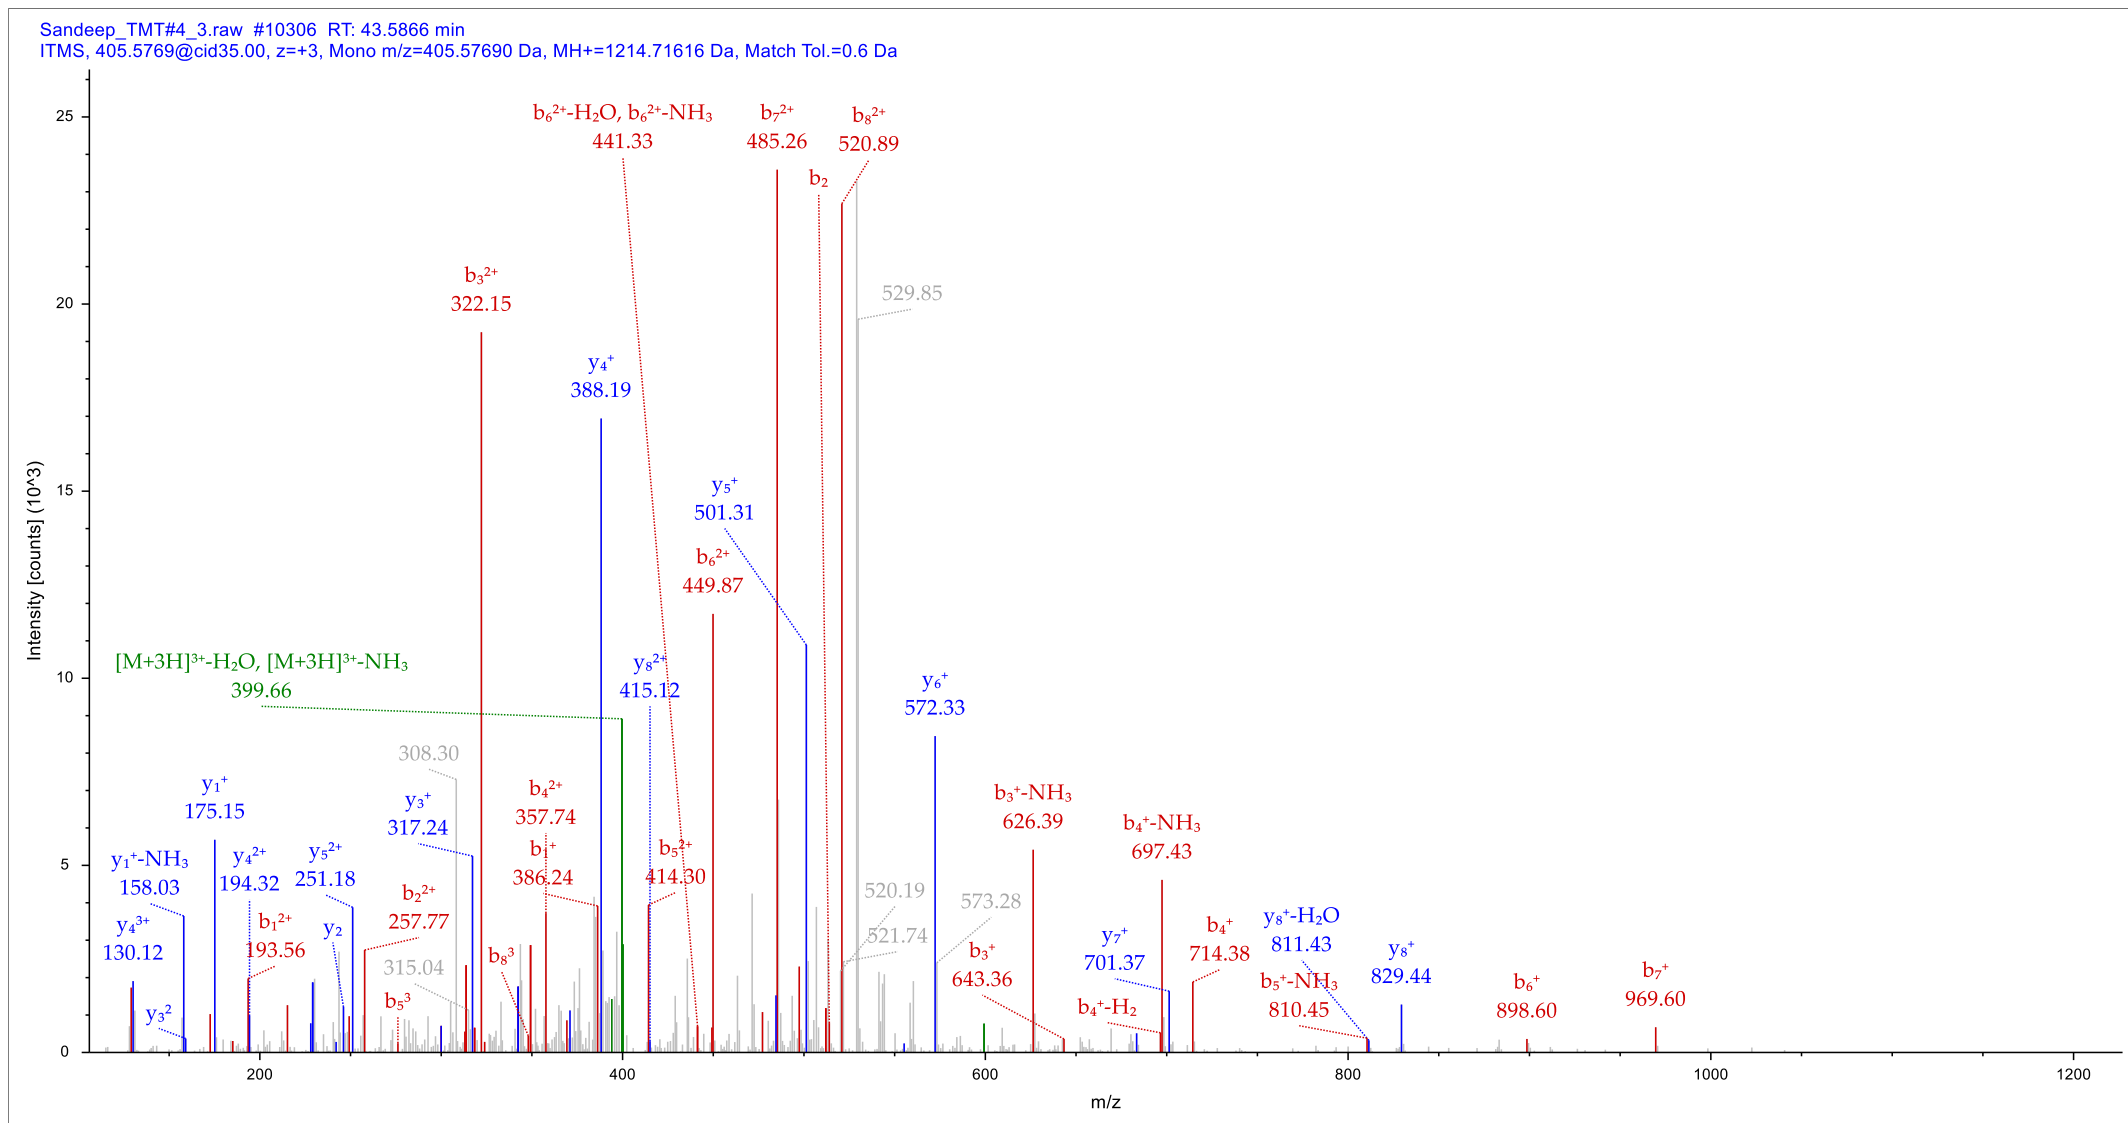



## Peptide consensus view

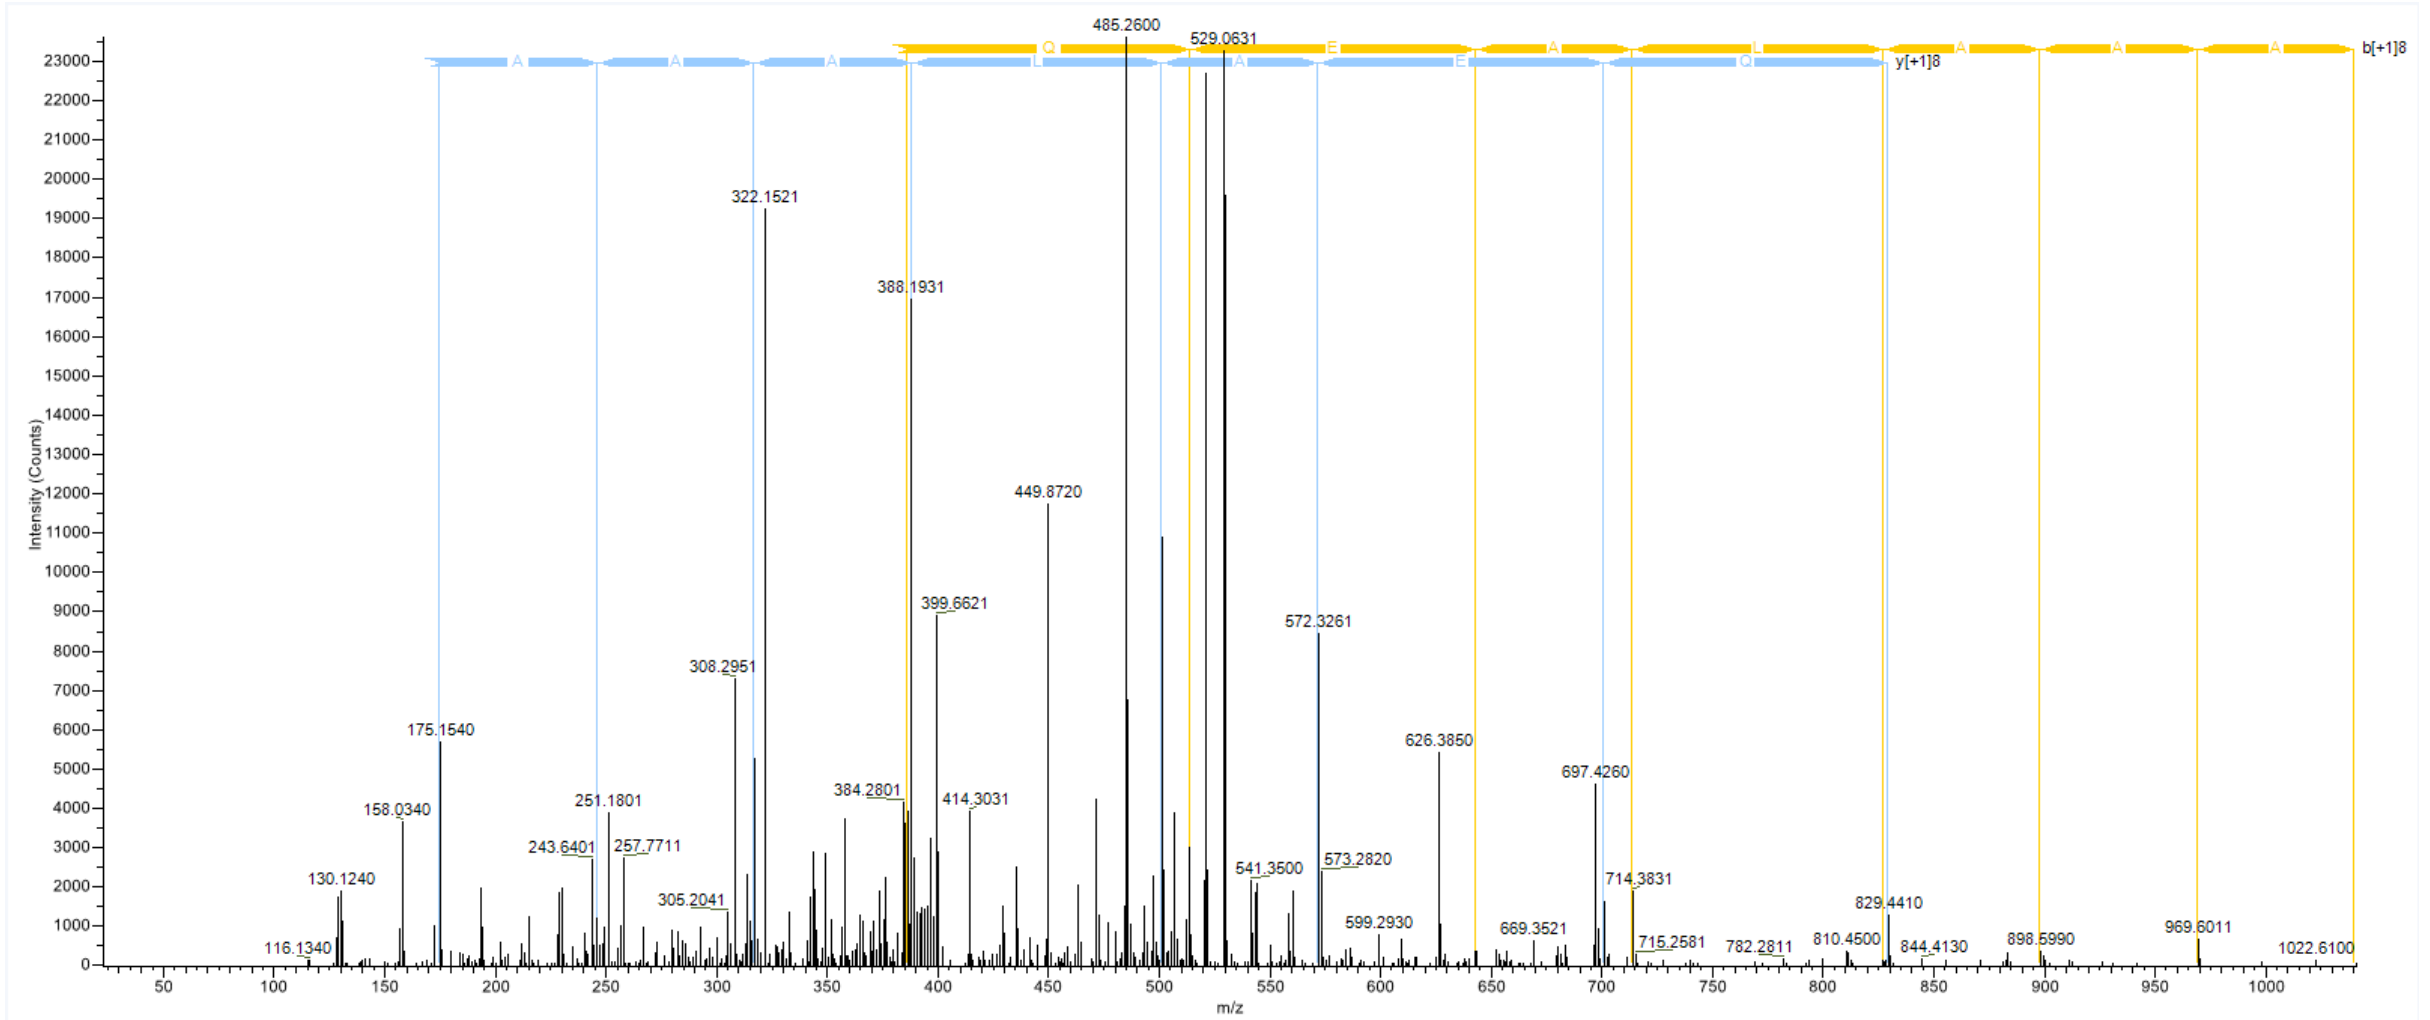

**r[Q]E[A]L[A]A[A]R**

Sequence: MQYATGPLLK, K10-TMT6plex (229.16293 Da), M1-TMT6plex (229.16293 Da)

Charge: +2, Monoisotopic m/z: 790.46710 Da (-0.64 mmu/-0.81 ppm), MH+: 1579.92693 Da, RT: 118.2856 min,

Identified with: Sequest HT (v1.17); XCorr:3.97, Percolator q-Value:1.6e-4, Percolator PEP:4.9e-4, Ions matched by search engine: 0/0

Fragment match tolerance used for search: 0.6 Da

Fragments used for search: b; b-H<sub>2</sub>O; b-NH<sub>3</sub>; y; y-H<sub>2</sub>O; y-NH<sub>3</sub>

Protein references (1): Thioredoxin reductase-like selenoprotein T OS=Mus musculus OX=10090 GN=Selenot PE=1 SV=2

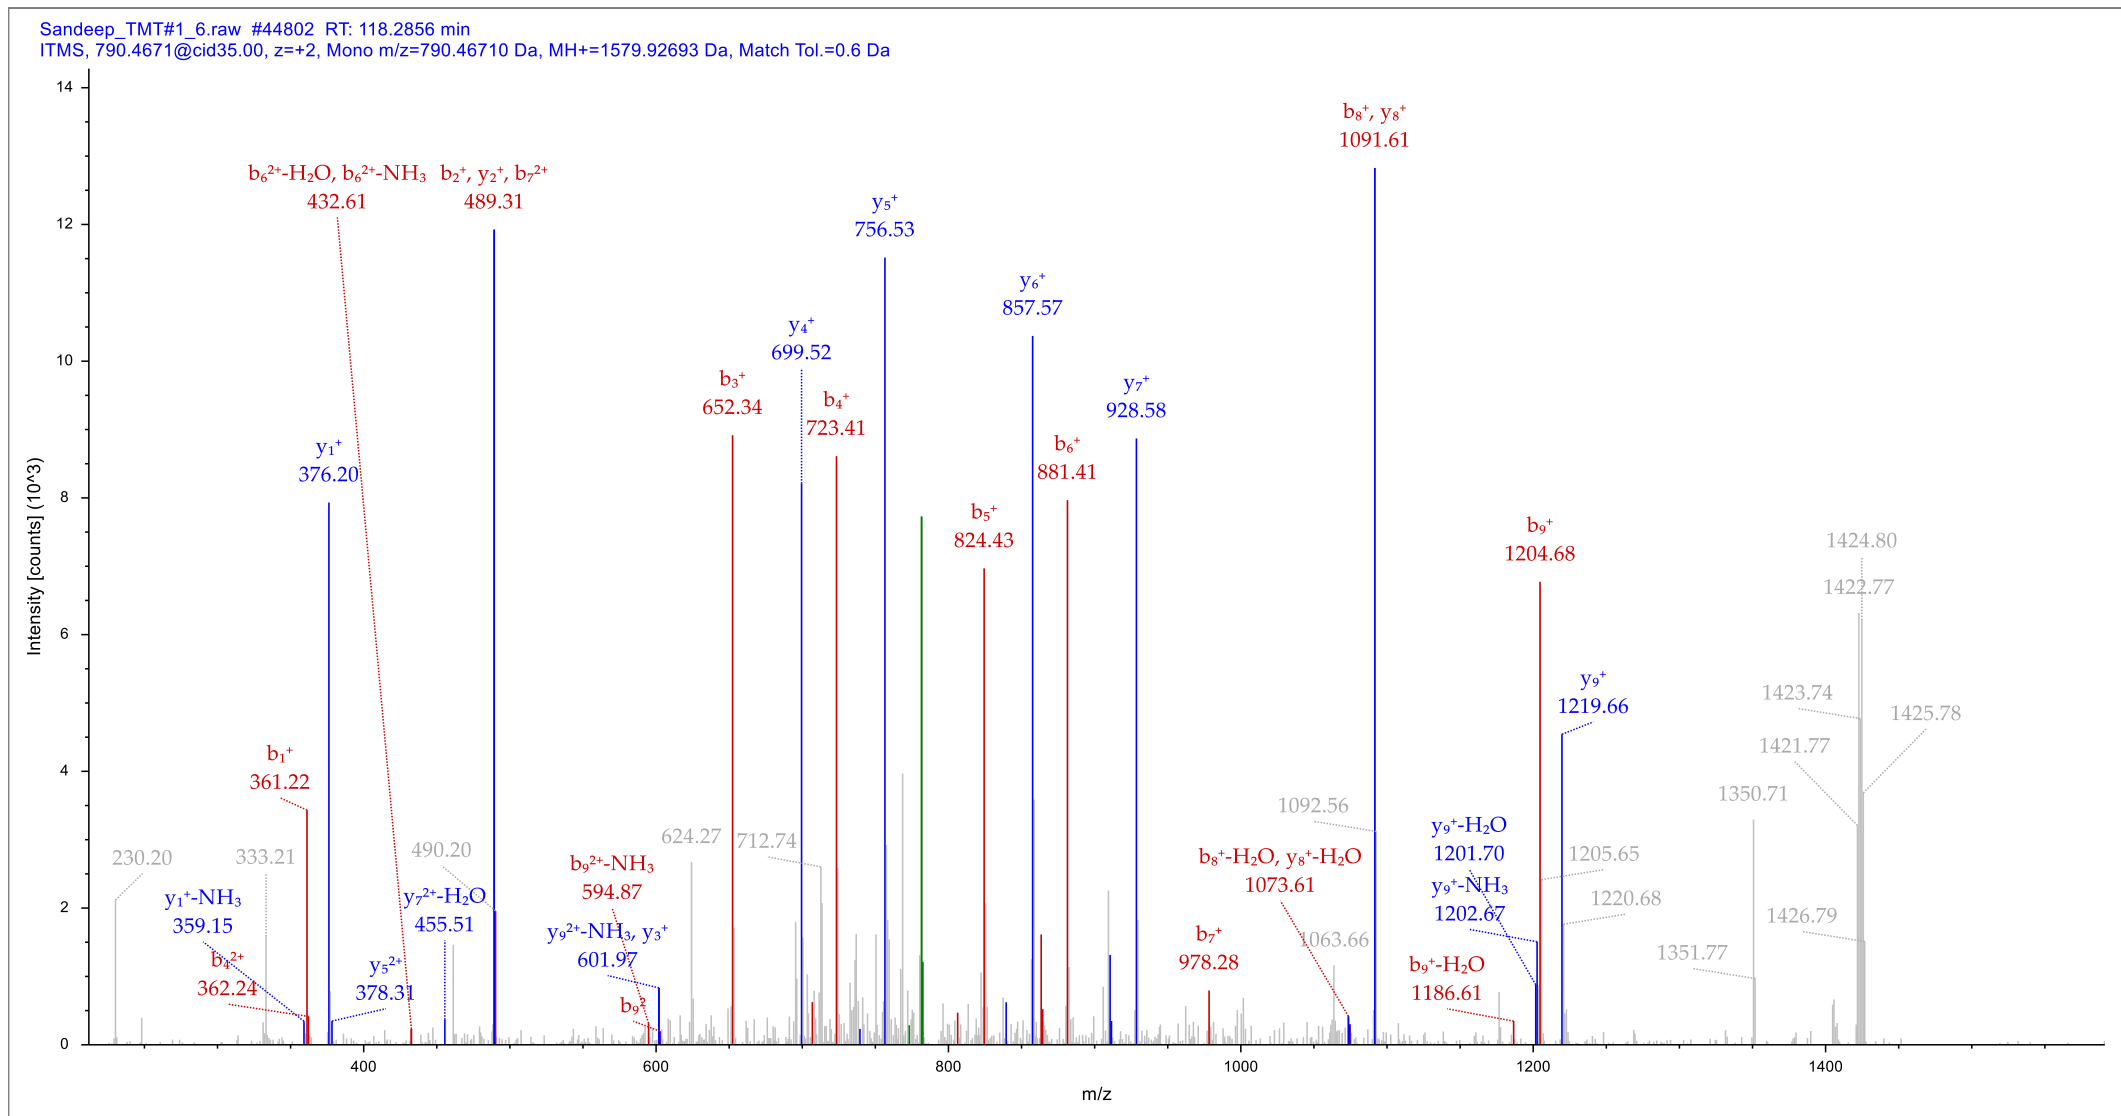

## Peptide consensus view

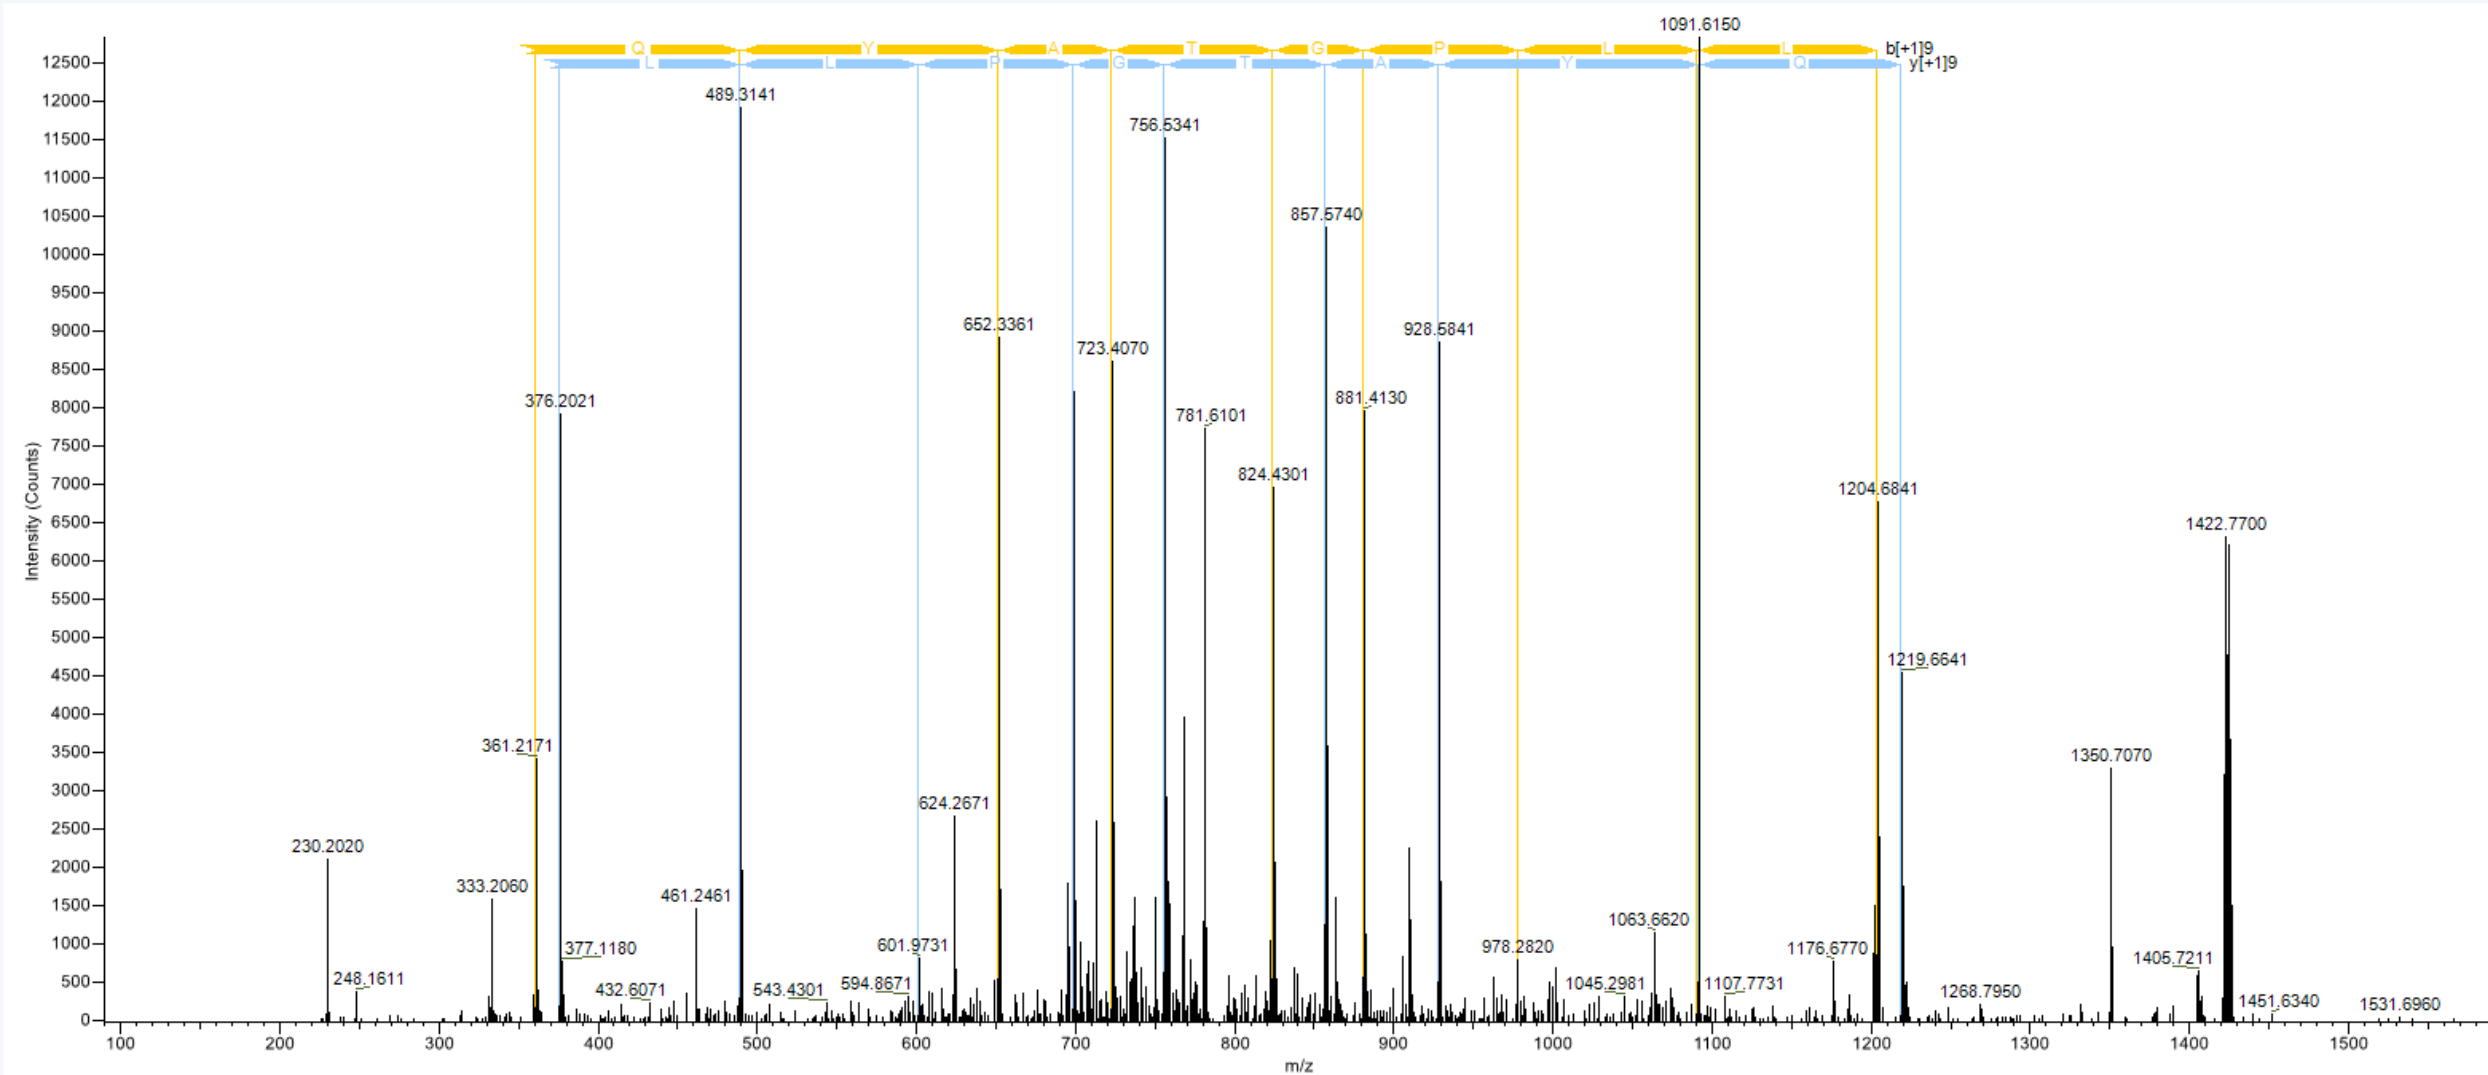

$m[Q]Y[A]T[G]P[L]L[k]$

Sequence: IEGENYLPQPIYR, I1-TMT6plex (229.16293 Da)

Charge: +2, Monoisotopic m/z: 910.99017 Da (-0.67 mmu/-0.74 ppm), MH+: 1820.97307 Da, RT: 123.8959 min,

Identified with: Sequest HT (v1.17); XCorr:4.71, Percolator q-Value:0.0e0, Percolator PEP:5.7e-5, Ions matched by search engine: 0/0

Fragment match tolerance used for search: 0.6 Da

Fragments used for search: b; b-H<sub>2</sub>O; b-NH<sub>3</sub>; y; y-H<sub>2</sub>O; y-NH<sub>3</sub>

Protein references (1): Thioredoxin reductase-like selenoprotein T OS=Mus musculus OX=10090 GN=Selenot PE=1 SV=2

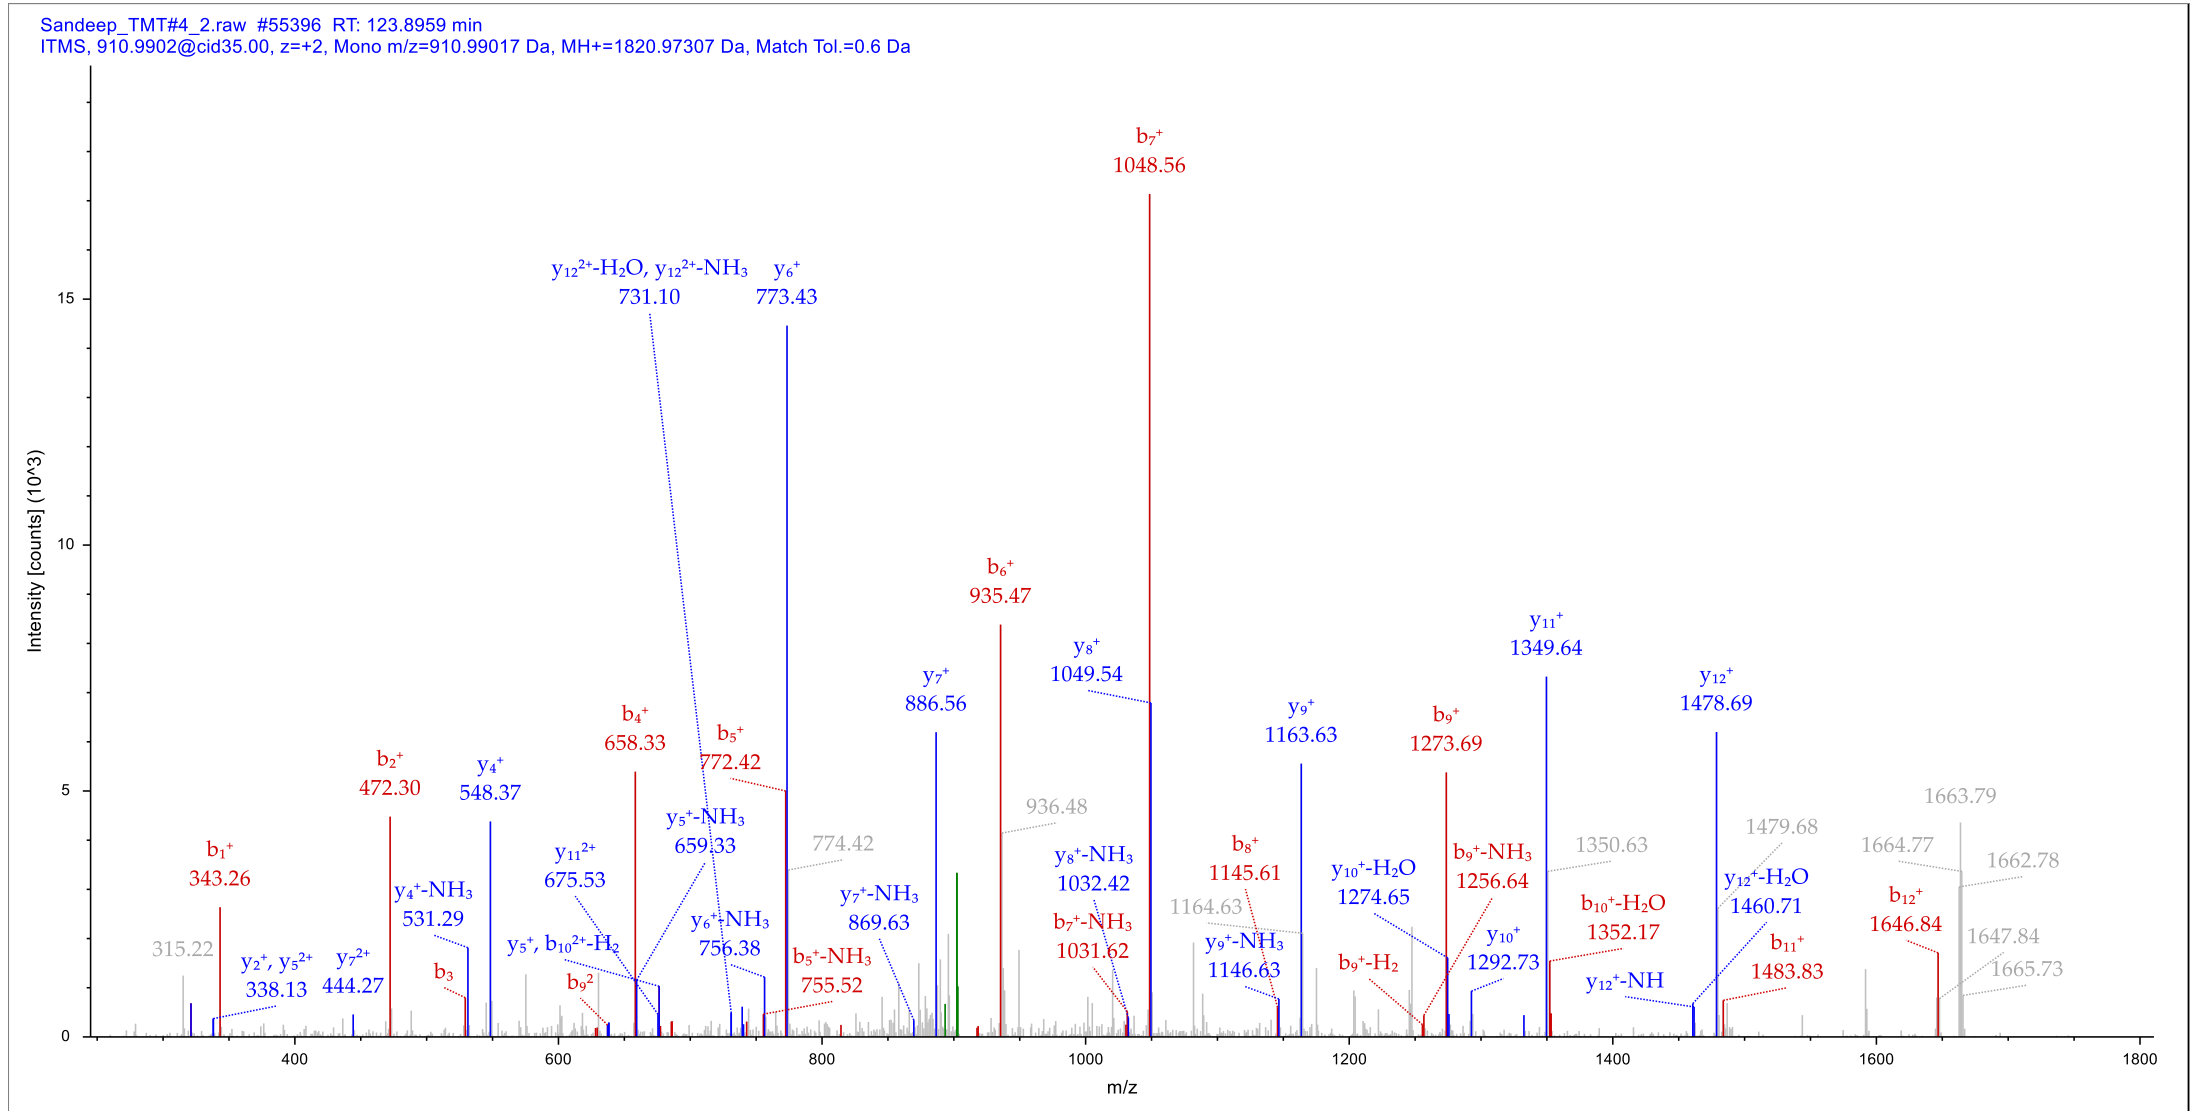

## Peptide consensus view

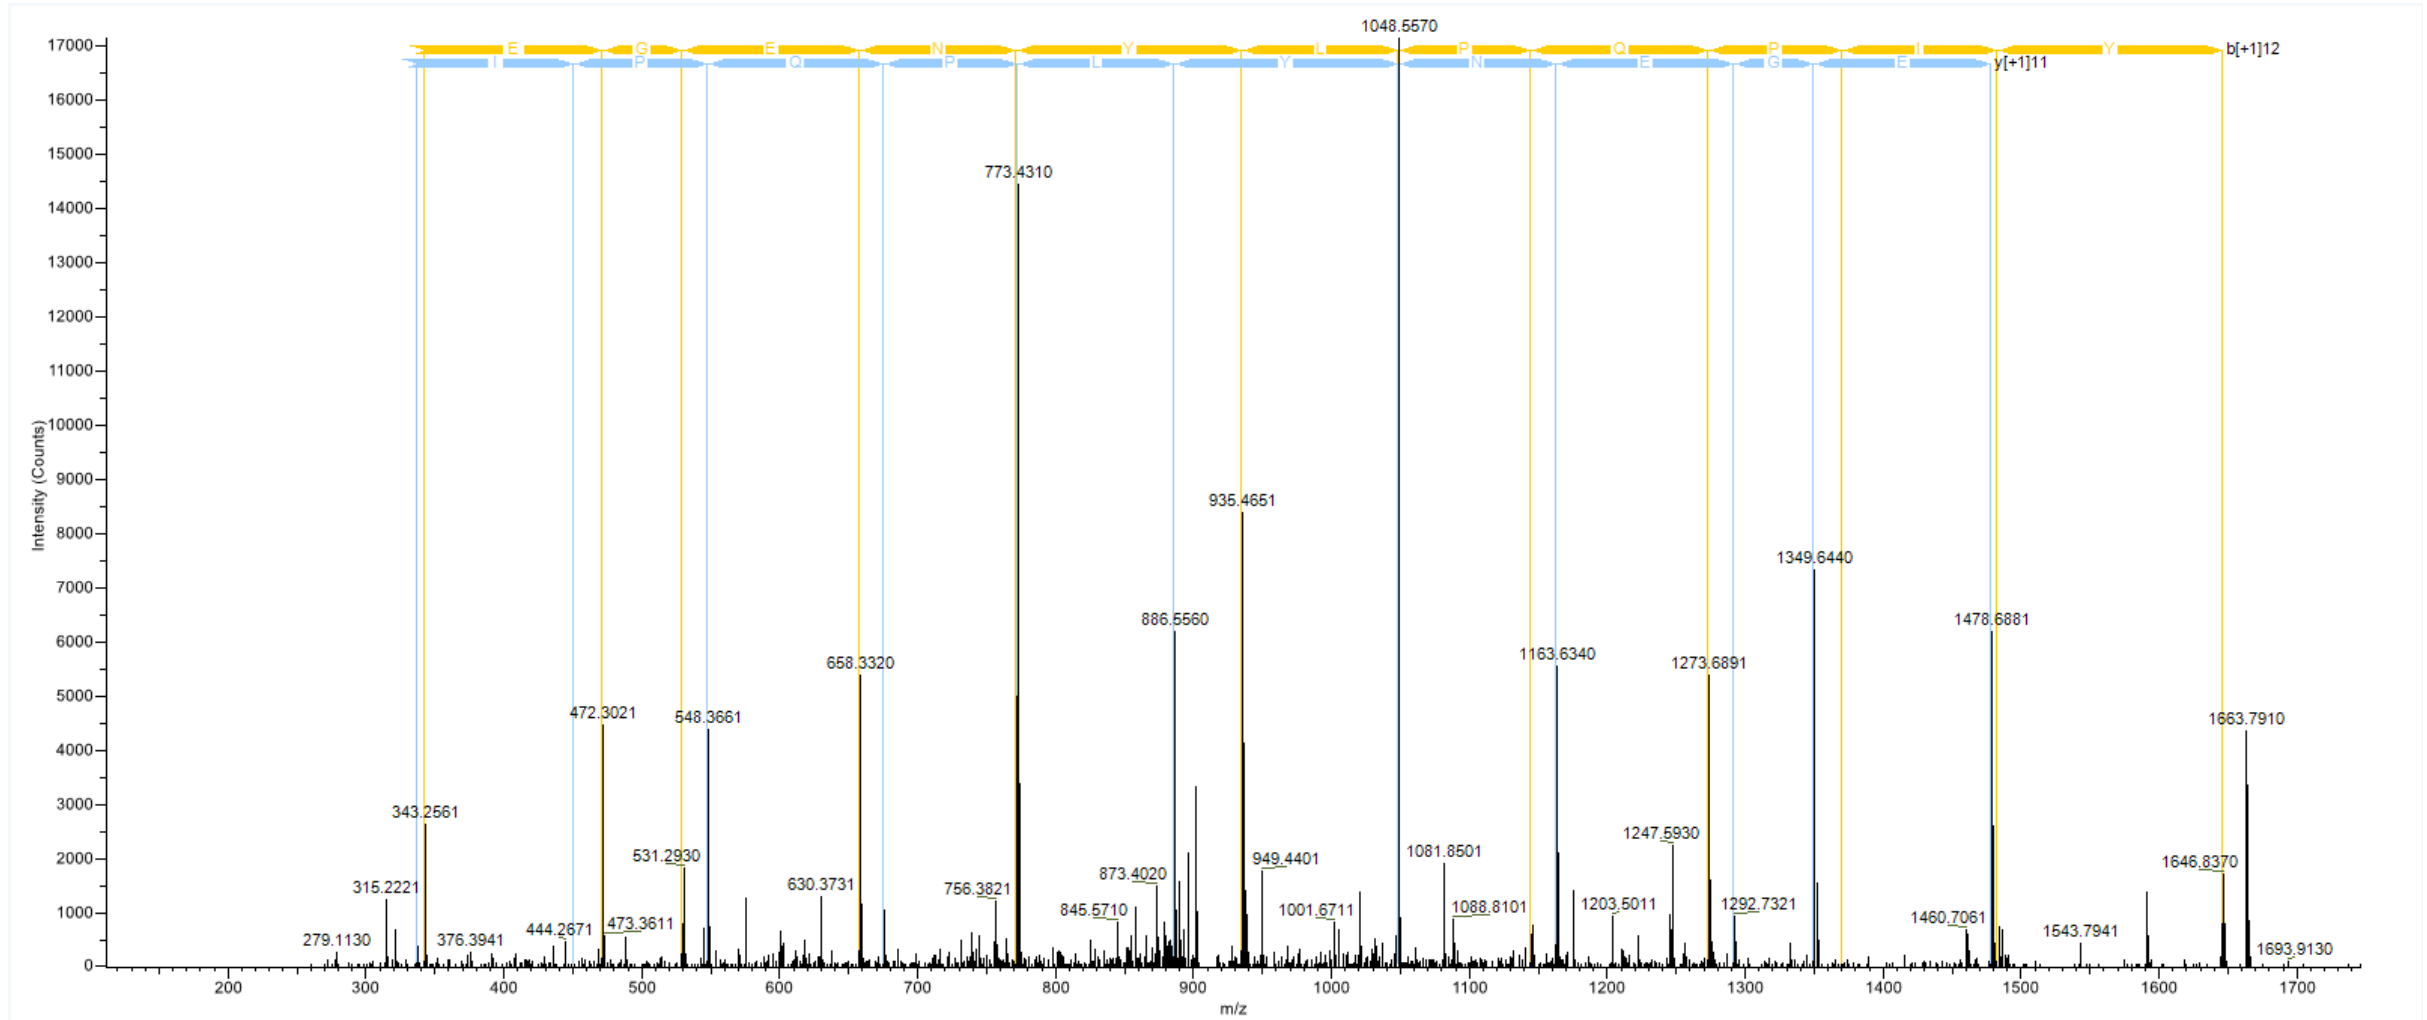

**i** [E] [G] [E] [N] [Y] [L] [P] [Q] [P] [I] [Y] [R]

Sequence: GDGYVDTESK, K10-TMT6plex (229.16293 Da), G1-TMT6plex (229.16293 Da)  
 Charge: +2, Monoisotopic m/z: 764.89874 Da (+0.34 mmu/+0.45 ppm), MH+: 1528.79021 Da, RT: 73.1536 min,  
 Identified with: Sequest HT (v1.17); XCorr:3.48, Percolator q-Value:1.4e-4, Percolator PEP:4.1e-4, Ions matched by search engine: 0/0  
 Fragment match tolerance used for search: 0.6 Da  
 Fragments used for search: b; b-H<sub>2</sub>O; y; y-H<sub>2</sub>O; y-NH<sub>3</sub>  
 Protein references (1): - Selenoprotein W OS=Mus musculus OX=10090 GN=Selenow PE=1 SV=3

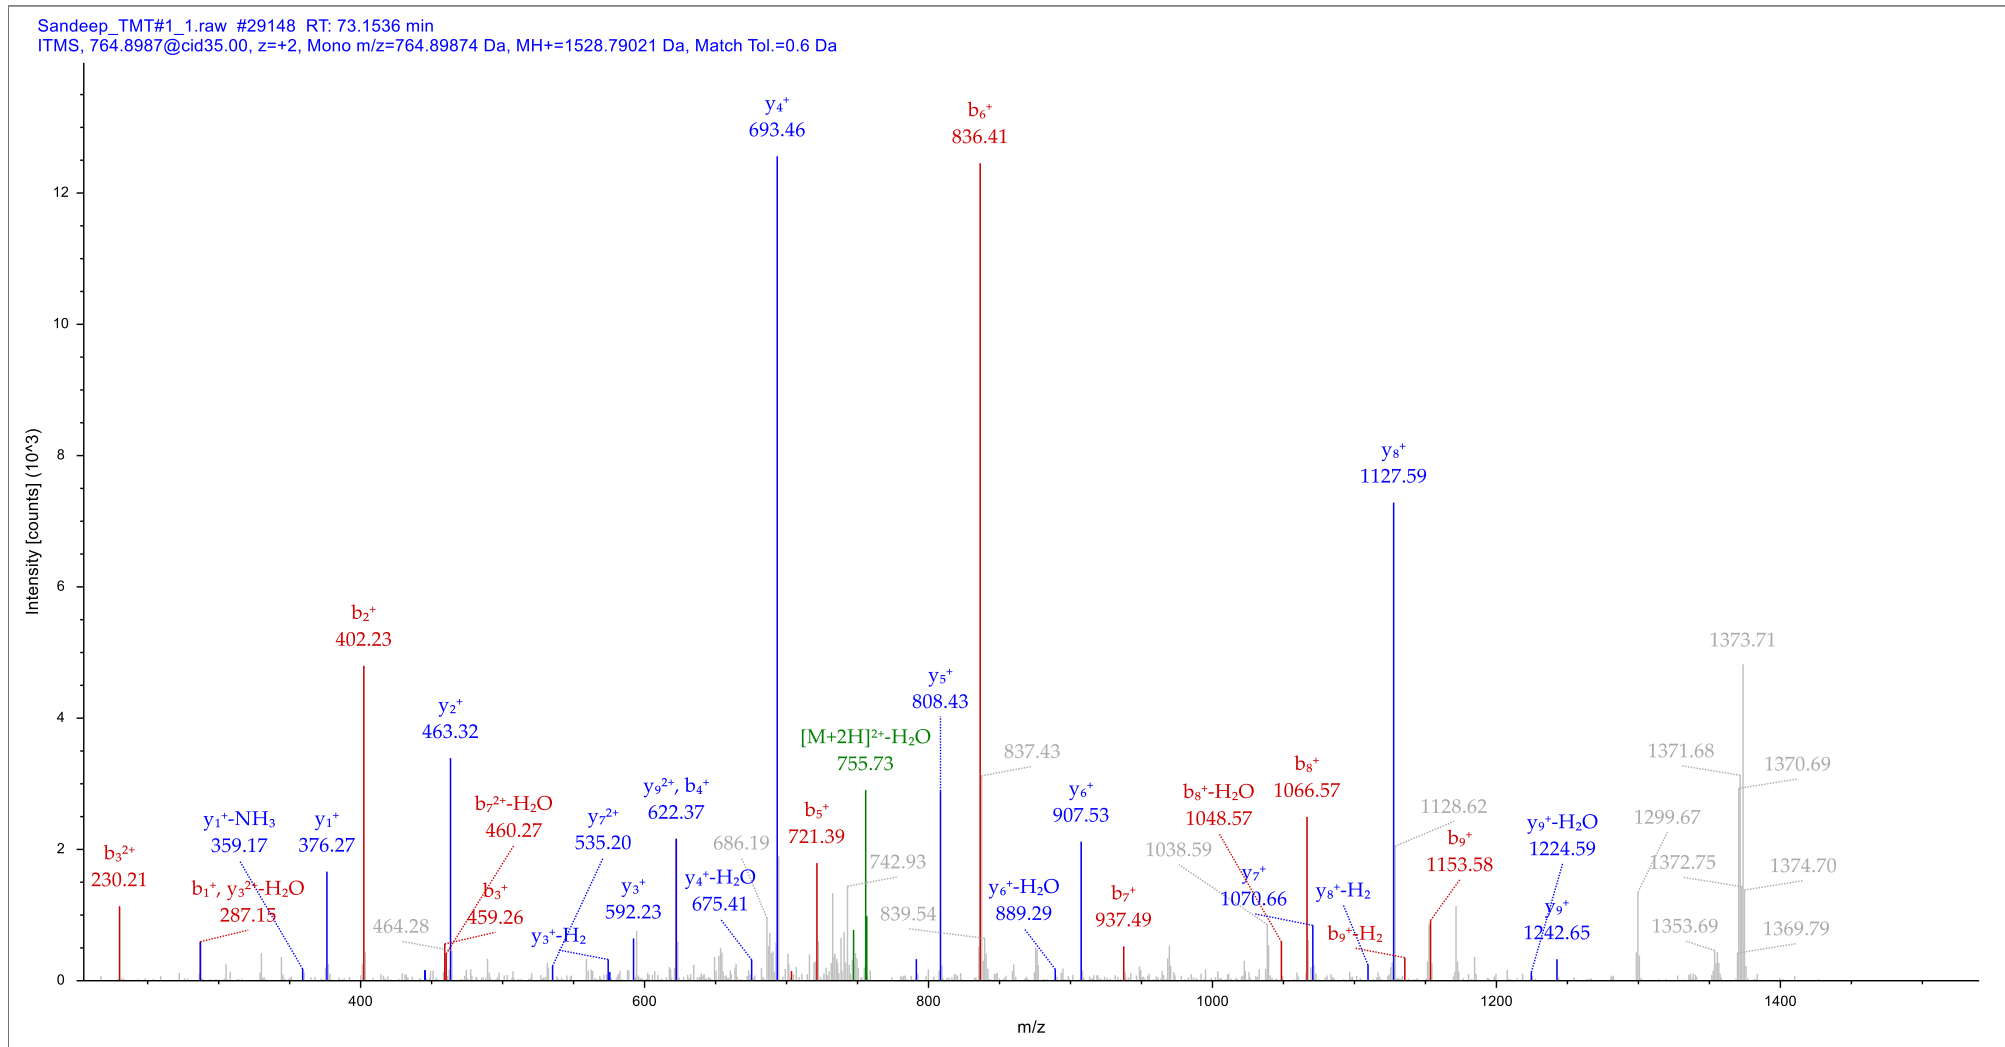

## Peptide consensus view

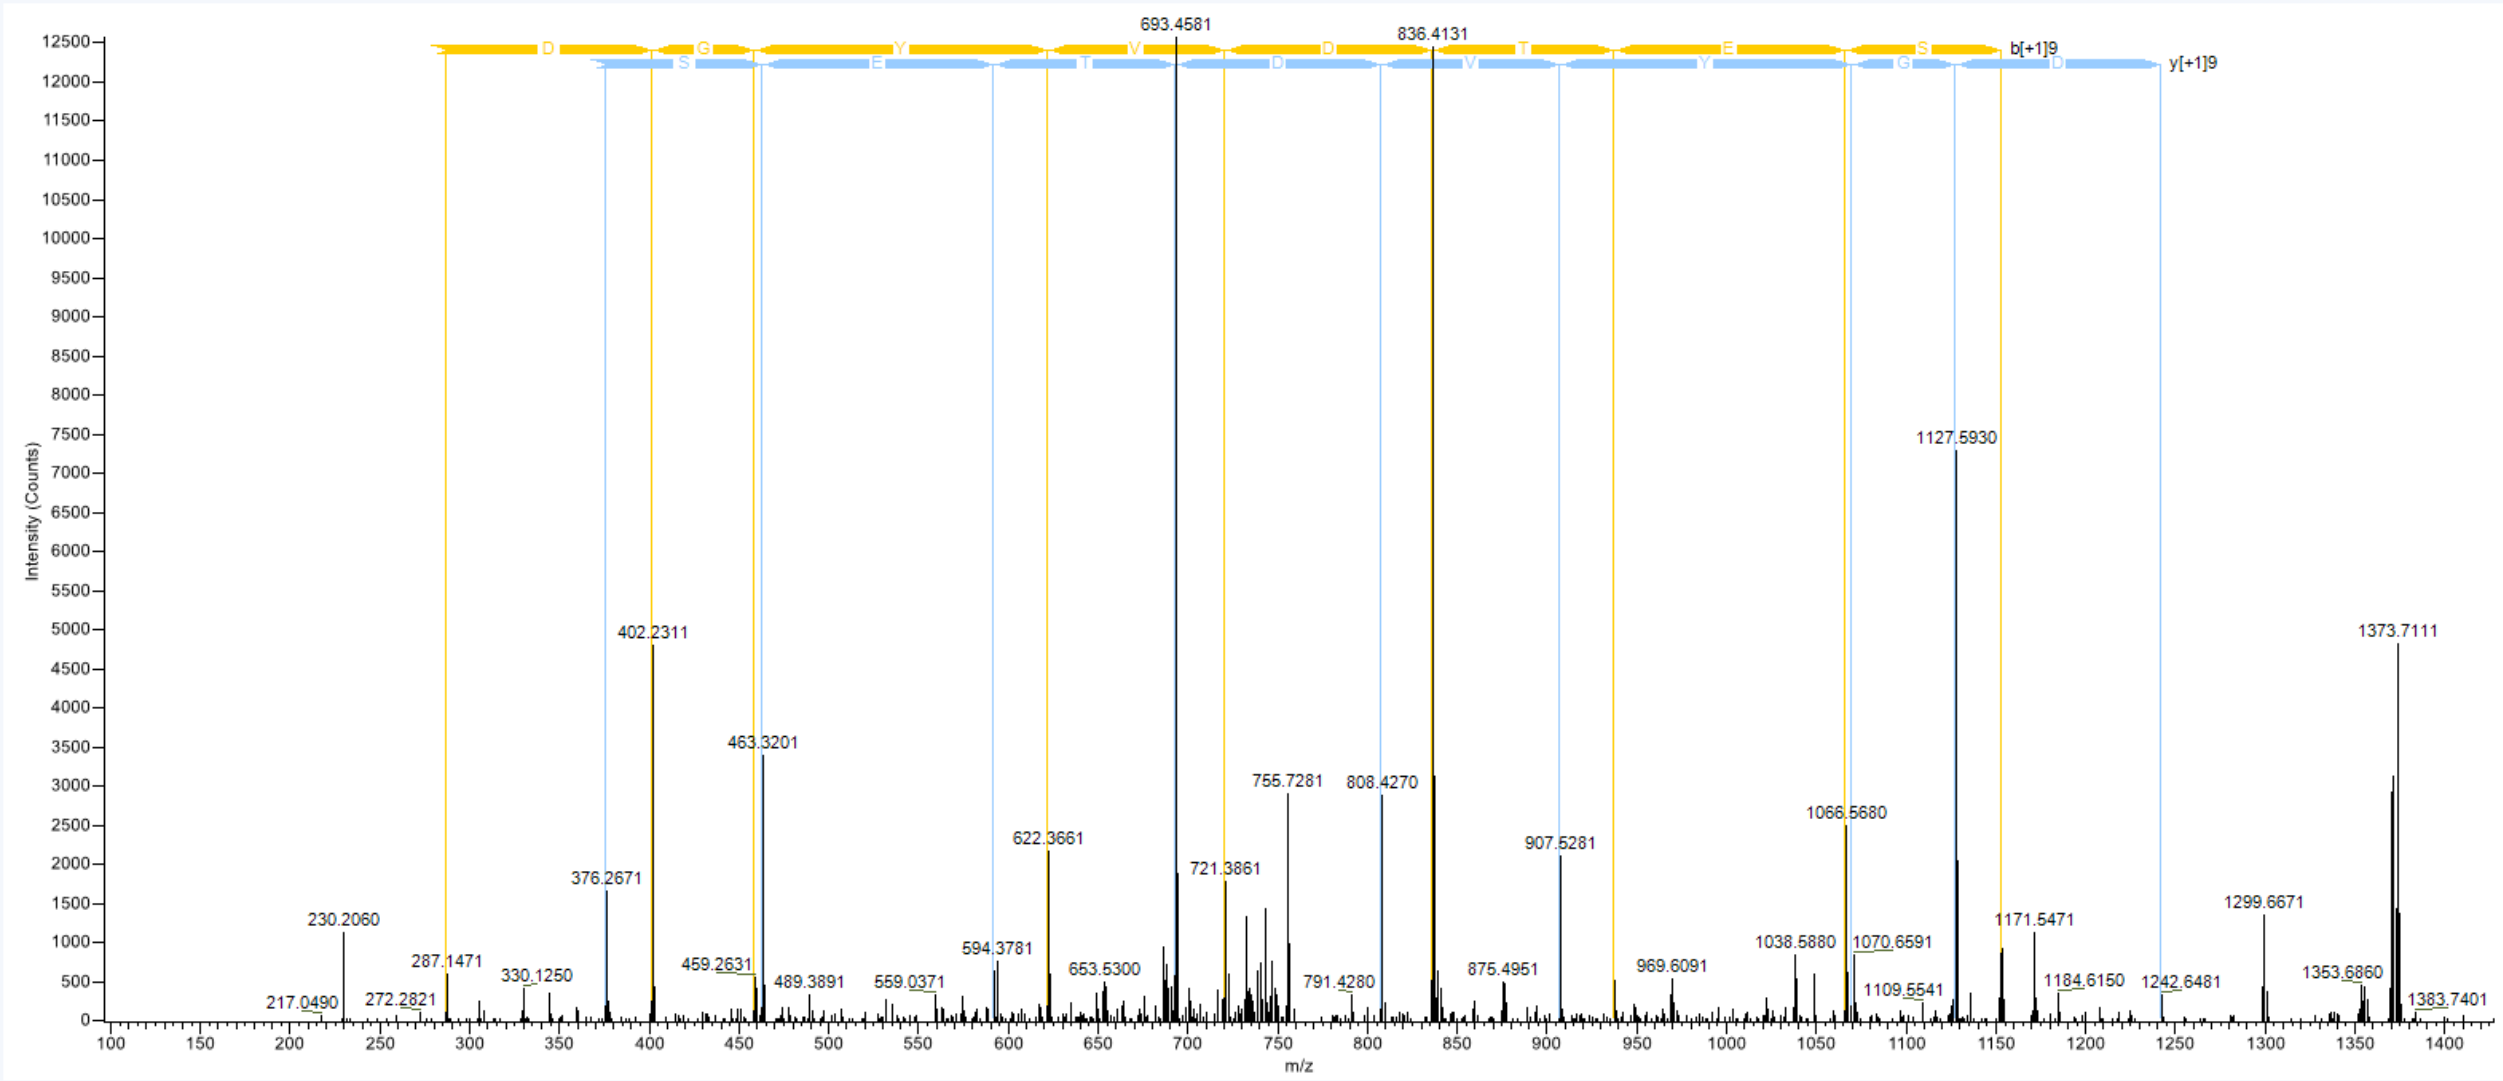

**g**[D][G][Y][V][D][T][E][S]**k**
