# Supplementary material
Source: PubMed Central journal article supplement (PMC6592718)

**Figure S2.** Schematic representation showing protein sequence coverage by peptides of the 13 selenoproteins in murine primary bone marrow-derived macrophages.

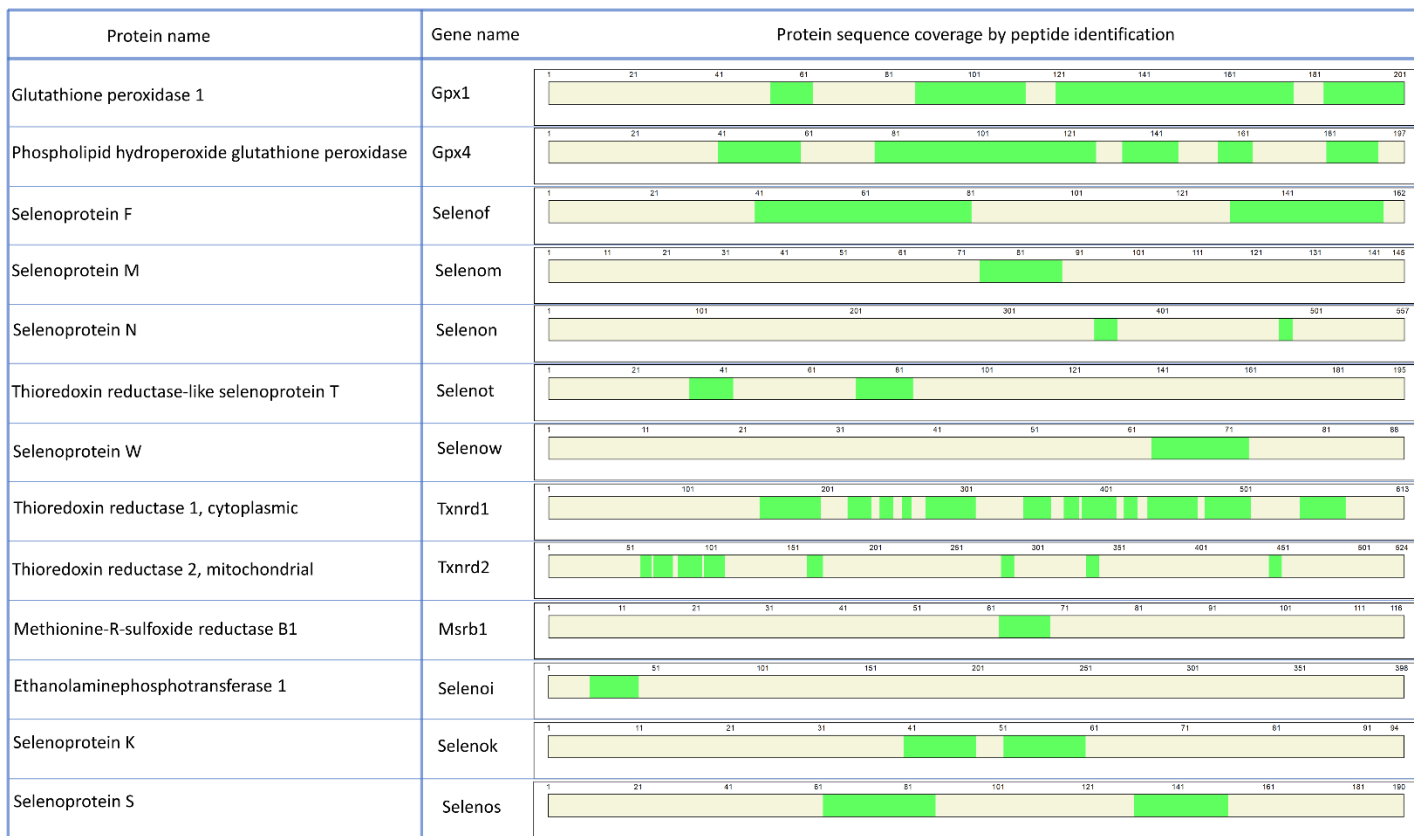

Supplement: NIHMS1526751-supplement-13361_2019_2192_MOESM2_ESM.pdf [file NIHMS1526751-supplement-13361_2019_2192_MOESM2_ESM.pdf]
