# Supplementary material
Source: PubMed Central journal article supplement (PMC6592718)
Supplement: NIHMS1526751-supplement-13361_2019_2192_MOESM3_ESM.pdf [file NIHMS1526751-supplement-13361_2019_2192_MOESM3_ESM.pdf]

**Table S1. Mass spectrometry and tandem mass tag (TMT) sample designations**

| Sample ID                | Set | TMT Channel |
|--------------------------|-----|-------------|
| 0hr 0Se, Replicate #1    | A   | 126         |
| 0hr 250Se, Replicate #1  | A   | 127N        |
| 4hr 0Se, Replicate #1    | A   | 127C        |
| 4hr 250Se, Replicate #1  | A   | 128N        |
| 8hr 0Se, Replicate #1    | A   | 128C        |
| 8hr 250Se, Replicate #1  | A   | 129N        |
| 20hr 0Se, Replicate #1   | A   | 129C        |
| 20hr 250Se, Replicate #1 | A   | 130N        |
| 0hr 0Se, Replicate #2    | B   | 126         |
| 0hr 250Se, Replicate #2  | B   | 127N        |
| 4hr 0Se, Replicate #2    | B   | 127C        |
| 4hr 250Se, Replicate #2  | B   | 128N        |
| 8hr 0Se, Replicate #2    | B   | 128C        |
| 8hr 250Se, Replicate #2  | B   | 129N        |
| 20hr 0Se, Replicate #2   | B   | 130C        |
| 20hr 250Se, Replicate #2 | B   | 131         |
| 0hr 0Se, Replicate #3    | C   | 126         |
| 0hr 250Se, Replicate #3  | C   | 127N        |
| 4hr 0Se, Replicate #3    | C   | 127C        |
| 4hr 250Se, Replicate #3  | C   | 128N        |
| 8hr 0Se, Replicate #3    | C   | 129C        |
| 8hr 250Se, Replicate #3  | C   | 130N        |
| 20hr 0Se, Replicate #3   | C   | 130C        |
| 20hr 250Se, Replicate #3 | C   | 131         |
