# Supplementary material
Source: PubMed Central journal article supplement (PMC6592718)
Supplement: NIHMS1526751-supplement-13361_2019_2192_MOESM4_ESM.pdf [file NIHMS1526751-supplement-13361_2019_2192_MOESM4_ESM.pdf]

Selenoproteome Identification in Inflamed Murine Primary Bone Marrow-derived Macrophages by nano-LC Orbitrap Fusion Tribrid Mass Spectrometry

Table S2: TMT labeled peptides of Selenoproteins  
For sequences highlighted in yellow, MS/MS spectra are provided in Figure S1

| Protein name                                      | Annotated Sequence                   | Modifications  | # PSMs | Master Prc# | Missed C Theo. | MH+ m/z [Da] | ΔM [ppm] | Percolator | Percolator | XCorr | Positions i    | Sequence Length |
|---------------------------------------------------|--------------------------------------|----------------|--------|-------------|----------------|--------------|----------|------------|------------|-------|----------------|-----------------|
| Selenoprotein N                                   | [R].QLAGLHLEK.[Y]                    | 1×TMT6plex [K] | 1      | D322R5      | 0              | 1466.91      | 489.64   | 0.19       | 0.0        | 0.0   | 3.00 [476-484] | 9               |
| Selenoprotein N                                   | [R].LPSGEPLQFVFEEIK.[W]              | 1×TMT6plex [K] | 2      | D322R5      | 0              | 2191.24      | 731.08   | -2.20      | 0.0        | 0.1   | 2.04 [356-370] | 15              |
| Phospholipid hydroperoxide glutathione peroxidase | [R].SMHEFSAK.[D]                     | 1×TMT6plex [K] | 3      | O70325      | 0              | 1394.75      | 465.59   | -0.61      | 0.0        | 0.0   | 3.34 [40-47]   | 8               |
| Phospholipid hydroperoxide glutathione peroxidase | [K].DIDGHMVCLDK.[Y]                  | 1×Carbamidomr  | 8      | O70325      | 0              | 1760.91      | 587.64   | 0.18       | 0.0        | 0.0   | 4.34 [48-58]   | 11              |
| Phospholipid hydroperoxide glutathione peroxidase | [K].EFAAGYNVK.[F]                    | 1×TMT6plex [K] | 7      | O70325      | 0              | 1456.82      | 728.91   | -0.53      | 0.0        | 0.0   | 4.67 [118-126] | 9               |
| Phospholipid hydroperoxide glutathione peroxidase | [R].GMLGNAIK.[W]                     | 1×TMT6plex [K] | 4      | O70325      | 0              | 1261.77      | 631.39   | -1.60      | 0.0        | 0.0   | 3.01 [155-162] | 8               |
| Phospholipid hydroperoxide glutathione peroxidase | [K].ICVNGDDAHPWLK.[W]                | 1×Carbamidomr  | 3      | O70325      | 0              | 1983.05      | 661.69   | 0.33       | 0.0        | 0.0   | 3.54 [133-145] | 13              |
| Phospholipid hydroperoxide glutathione peroxidase | [R].ILAFPCNQFGR.[Q]                  | 1×Carbamidomr  | 1      | O70325      | 0              | 1551.83      | 776.42   | -0.92      | 0.0        | 0.1   | 3.07 [97-107]  | 11              |
| Phospholipid hydroperoxide glutathione peroxidase | [R].QEPGSNQEIK.[E]                   | 1×TMT6plex [K] | 10     | O70325      | 0              | 1587.87      | 529.96   | 0.26       | 0.0        | 0.0   | 3.87 [108-117] | 10              |
| Phospholipid hydroperoxide glutathione peroxidase | [K].TDVNYTQLVDLHAR.[Y]               | 1×TMT6plex [N] | 5      | O70325      | 0              | 1874.00      | 625.34   | -0.69      | 0.0        | 0.0   | 6.05 [76-89]   | 14              |
| Phospholipid hydroperoxide glutathione peroxidase | [R].YAEAGCLR.[I]                     | 1×Carbamidomr  | 3      | O70325      | 0              | 1097.56      | 549.28   | -0.23      | 0.0        | 0.0   | 2.88 [90-96]   | 7               |
| Phospholipid hydroperoxide glutathione peroxidase | [R].YGPMEEPQVIEK.[D]                 | 1×TMT6plex [K] | 9      | O70325      | 0              | 1878.01      | 939.51   | -0.63      | 0.0        | 0.0   | 4.85 [180-191] | 12              |
| Glutathione peroxidase 1                          | [K].AHLPTFTLR.[N]                    | 1×TMT6plex [N] | 5      | P11352      | 0              | 1330.78      | 665.89   | -2.34      | 0.0        | 0.0   | 2.56 [120-128] | 9               |
| Glutathione peroxidase 1                          | [R].DYTEMNDLQK.[R]                   | 1×TMT6plex [K] | 14     | P11352      | 0              | 1714.87      | 857.94   | -0.98      | 0.0        | 0.0   | 4.07 [53-62]   | 10              |
| Glutathione peroxidase 1                          | [K].FLVGPDPGVVPR.[R]                 | 1×TMT6plex [N] | 5      | P11352      | 0              | 1384.82      | 692.91   | -0.36      | 0.0        | 0.0   | 3.02 [165-175] | 11              |
| Glutathione peroxidase 1                          | [R].NALPTSPDDPTALMTDPK.[Y]           | 1×TMT6plex [K] | 11     | P11352      | 0              | 2342.23      | 1171.62  | 1.82       | 0.0        | 0.0   | 5.57 [129-146] | 18              |
| Glutathione peroxidase 1                          | [R].NDIAWNFEK.[F]                    | 1×TMT6plex [K] | 9      | P11352      | 0              | 1594.86      | 797.93   | -1.00      | 0.0        | 0.0   | 4.00 [156-164] | 9               |
| Glutathione peroxidase 1                          | [K].NEEILNSLK.[Y]                    | 1×TMT6plex [K] | 6      | P11352      | 0              | 1517.89      | 759.45   | -1.58      | 0.0        | 0.0   | 4.16 [87-95]   | 9               |
| Glutathione peroxidase 1                          | [R].TIDIEPDIETLLSQSGNS.[-]           | 1×TMT6plex [N] | 12     | P11352      | 0              | 2289.17      | 1145.09  | -0.26      | 0.0        | 0.0   | 6.18 [183-201] | 19              |
| Glutathione peroxidase 1                          | [K].YIIWSPVCR.[N]                    | 1×Carbamidomr  | 3      | P11352      | 0              | 1422.78      | 711.89   | 0.45       | 0.0        | 0.0   | 2.65 [147-155] | 9               |
| Glutathione peroxidase 1                          | [K].YVRPGGGGFEPNFTLFEK.[C]           | 1×TMT6plex [K] | 4      | P11352      | 0              | 2416.31      | 806.11   | -1.11      | 0.0        | 0.0   | 5.73 [96-112]  | 17              |
| Thioredoxin reductase-like selenoprotein T        | [R].IEGENYLPQPIYR.[H]                | 1×TMT6plex [N] | 11     | P62342      | 0              | 1820.97      | 910.99   | -0.87      | 0.0        | 0.0   | 4.37 [71-83]   | 13              |
| Thioredoxin reductase-like selenoprotein T        | [K].MQYATGPLLK.[F]                   | 1×TMT6plex [K] | 8      | P62342      | 0              | 1579.93      | 790.47   | -0.81      | 0.0        | 0.0   | 4.06 [33-42]   | 10              |
| Selenoprotein W                                   | [R].GDGYVDTESK.[F]                   | 1×TMT6plex [K] | 2      | P63300      | 0              | 1528.79      | 764.90   | 0.45       | 0.0        | 0.0   | 3.48 [63-72]   | 10              |
| Ethanolaminephosphotransferase 1                  | [K].YSALDTNPLSLYIMHPPFWNTIVK.[V]     | 1×Deamidated   | 2      | Q807A1      | 0              | 3182.70      | 1061.58  | 6.21       | 0.0        | 0.0   | 6.85 [20-42]   | 23              |
| Selenoprotein M                                   | [K].HLPGADPELVLLSR.[N]               | 1×TMT6plex [N] | 2      | Q8VHC3      | 0              | 1746.01      | 582.67   | -0.42      | 0.0        | 0.0   | 4.50 [74-87]   | 14              |
| Selenoprotein S                                   | [R].NSGRPQEEEDGPGPSTSSVIPK.[G]       | 1×TMT6plex [K] | 2      | Q9BCZ4      | 0              | 2597.36      | 866.46   | -1.64      | 0.0        | 0.0   | 4.85 [131-151] | 21              |
| Selenoprotein S                                   | [R].QLDQAAETVLEPDVVVK.[R]            | 1×TMT6plex [K] | 1      | Q9BCZ4      | 0              | 2241.27      | 747.76   | 0.67       | 0.0        | 0.0   | 4.22 [62-77]   | 16              |
| Selenoprotein S                                   | [K].RQEALAAAR.[L]                    | 1×TMT6plex [N] | 2      | Q9BCZ4      | 1              | 1214.72      | 405.58   | -2.24      | 0.0        | 0.0   | 3.53 [78-86]   | 9               |
| Selenoprotein F                                   | [R].ELGFSSNLLCSSCDLLGFNLLPLDPVCR.[G] | 3×Carbamidomr  | 3      | Q9ERR7      | 0              | 3553.77      | 889.20   | 1.34       | 0.0        | 0.0   | 4.26 [40-68]   | 29              |
| Selenoprotein F                                   | [R].GCCQEEAQFETK.[K]                 | 2×Carbamidomr  | 8      | Q9ERR7      | 0              | 1944.92      | 972.96   | -1.30      | 0.0        | 0.0   | 4.85 [69-80]   | 12              |
| Selenoprotein F                                   | [K].LLDDNGNIAEELSILK.[W]             | 1×TMT6plex [K] | 5      | Q9ERR7      | 0              | 2215.26      | 1108.13  | -0.44      | 0.0        | 0.0   | 6.53 [130-145] | 16              |
| Selenoprotein F                                   | [K].WNTDSVEEFLSEK.[L]                | 1×TMT6plex [K] | 10     | Q9ERR7      | 0              | 2042.05      | 1021.53  | -0.41      | 0.0        | 0.0   | 5.74 [146-158] | 13              |
| Methionine-R-sulfoxide reductase B1               | [K].NRPEALK.[V]                      | 1×TMT6plex [K] | 1      | Q9JLC3      | 0              | 1285.80      | 429.27   | -1.34      | 0.0        | 0.0   | 2.87 [62-68]   | 7               |
| Selenoprotein K                                   | [R].GYGSSSDSR.[Y]                    | 1×TMT6plex [N] | 1      | Q9JLJ1      | 0              | 1144.54      | 572.77   | -0.58      | 0.0        | 0.0   | 2.73 [51-59]   | 9               |
| Selenoprotein K                                   | [K].TLLQQDVVK.[K]                    | 1×TMT6plex [K] | 2      | Q9JLJ1      | 0              | 1402.87      | 701.94   | -1.13      | 0.0        | 0.0   | 2.44 [40-47]   | 8               |
| Thioredoxin reductase 2, mitochondrial            | [KR].WGLGGTCVNVGCIPIK.[K]            | 2×Carbamidomr  | 9      | Q9JLT4      | 0              | 2076.11      | 1038.56  | -2.30      | 0.0        | 0.0   | 4.41 [167-181] | 15              |
| Thioredoxin reductase 2, mitochondrial            | [KR].WGLGGTCVNVGCIPIK.[K]            | 2×Carbamidomr  | 9      | Q9JLT4      | 0              | 2076.11      | 1038.56  | -2.30      | 0.0        | 0.0   | 4.41 [80-94]   | 15              |
| Thioredoxin reductase 2, mitochondrial            | [K].AGISTNPK.[N]                     | 1×TMT6plex [K] | 4      | Q9JLT4      | 0              | 1245.76      | 623.38   | -0.05      | 0.0        | 0.0   | 2.75 [330-337] | 8               |
| Thioredoxin reductase 2, mitochondrial            | [K].ASFVDEHTVYR.[G]                  | 1×TMT6plex [N] | 2      | Q9JLT4      | 0              | 1389.73      | 463.92   | -0.26      | 0.0        | 0.0   | 3.74 [159-168] | 10              |
| Thioredoxin reductase 2, mitochondrial            | [R].DASQCYIK.[M]                     | 1×Carbamidomr  | 1      | Q9JLT4      | 0              | 1442.77      | 721.89   | -1.33      | 0.0        | 0.0   | 3.00 [442-449] | 8               |
| Thioredoxin reductase 2, mitochondrial            | [K].EAAQLGK.[K]                      | 1×TMT6plex [K] | 3      | Q9JLT4      | 0              | 1174.72      | 587.86   | -0.47      | 0.0        | 0.0   | 2.96 [57-63]   | 7               |
| Thioredoxin reductase 2, mitochondrial            | [K].GCVPSHIK.[K]                     | 1×Carbamidomr  | 1      | Q9JLT4      | 0              | 1355.79      | 678.40   | 8.52       | 0.8        | 1.0   | 1.72 [278-285] | 8               |
| Thioredoxin reductase 2, mitochondrial            | [K].LMHQAALLGGMIR.[D]                | 1×TMT6plex [N] | 1      | Q9JLT4      | 0              | 1639.93      | 547.32   | -1.01      | 0.0        | 0.0   | 3.30 [96-108]  | 13              |
| Thioredoxin reductase 2, mitochondrial            | [K].VAVADYVEPSPR.[G]                 | 1×TMT6plex [N] | 2      | Q9JLT4      | 0              | 1531.83      | 511.28   | 0.05       | 0.8        | 1.0   | 0.98 [65-76]   | 12              |
| Thioredoxin reductase 1, cytoplasmic              | [K].CDYDNVPTTVFTPLEYGCCGLSEEK.[A]    | 3×Carbamidomr  | 5      | Q9JMH6      | 0              | 3412.58      | 1138.19  | -2.48      | 0.0        | 0.0   | 5.93 [479-503] | 25              |
| Thioredoxin reductase 1, cytoplasmic              | [K].EYCISSDDLFLSLPYCPGK.[T]          | 2×Carbamidomr  | 1      | Q9JMH6      | 0              | 2609.27      | 870.43   | -2.30      | 0.1        | 0.9   | 2.83 [289-306] | 18              |
| Thioredoxin reductase 1, cytoplasmic              | [R].FLIATGERPR.[Y]                   | 1×TMT6plex [N] | 6      | Q9JMH6      | 0              | 1388.82      | 463.61   | -1.24      | 0.0        | 0.0   | 3.78 [271-280] | 10              |
| Thioredoxin reductase 1, cytoplasmic              | [R].GFDQDMANK.[I]                    | 1×TMT6plex [K] | 14     | Q9JMH6      | 0              | 1483.76      | 742.38   | -1.16      | 0.0        | 0.0   | 3.49 [341-349] | 9               |
| Thioredoxin reductase 1, cytoplasmic              | [K].KLMHQAALLGQALK.[D]               | 2×TMT6plex [K] | 4      | Q9JMH6      | 1              | 2209.38      | 737.13   | 0.03       | 0.0        | 0.0   | 3.14 [182-195] | 14              |
| Thioredoxin reductase 1, cytoplasmic              | [K].KVYENAYGR.[F]                    | 1×TMT6plex [K] | 10     | Q9JMH6      | 1              | 1656.95      | 552.99   | -0.44      | 0.0        | 0.0   | 3.39 [238-247] | 10              |
| Thioredoxin reductase 1, cytoplasmic              | [K].LELTPVAIQAGR.[L]                 | 1×TMT6plex [N] | 10     | Q9JMH6      | 0              | 1496.90      | 499.64   | -0.72      | 0.0        | 0.0   | 4.04 [454-465] | 12              |
| Thioredoxin reductase 1, cytoplasmic              | [K].IEQIEAGTPGR.[L]                  | 1×TMT6plex [N] | 12     | Q9JMH6      | 0              | 1399.77      | 467.26   | -0.45      | 0.0        | 0.0   | 3.65 [370-380] | 11              |
| Thioredoxin reductase 1, cytoplasmic              | [K].IGEHEMEEHGK.[F]                  | 1×TMT6plex [K] | 10     | Q9JMH6      | 0              | 1737.94      | 435.24   | -0.42      | 0.0        | 0.0   | 4.52 [350-360] | 11              |
| Thioredoxin reductase 1, cytoplasmic              | [K].IICNLKDDER.[V]                   | 1×Carbamidomr  | 1      | Q9JMH6      | 1              | 1733.96      | 867.48   | -1.16      | 0.0        | 0.0   | 2.83 [539-548] | 10              |
| Thioredoxin reductase 1, cytoplasmic              | [K].LMHQAALLGQALK.[D]                | 1×TMT6plex [K] | 7      | Q9JMH6      | 0              | 1852.12      | 926.56   | -1.56      | 0.0        | 0.0   | 5.95 [183-195] | 13              |
| Thioredoxin reductase 1, cytoplasmic              | [K].IPVTDEEQTNVPYIYAIGDILEGK.[L]     | 1×TMT6plex [K] | 15     | Q9JMH6      | 0              | 3135.69      | 1045.90  | -1.62      | 0.0        | 0.0   | 6.51 [430-453] | 24              |
| Thioredoxin reductase 1, cytoplasmic              | [R].IVATNNK.[G]                      | 1×TMT6plex [K] | 8      | Q9JMH6      | 0              | 1217.76      | 609.38   | -1.02      | 0.0        | 0.0   | 2.43 [254-260] | 7               |
| Thioredoxin reductase 1, cytoplasmic              | [R].LYGGSNVK.[C]                     | 1×TMT6plex [K] | 11     | Q9JMH6      | 0              | 1295.77      | 648.39   | -2.14      | 0.0        | 0.0   | 2.86 [471-478] | 8               |
| Thioredoxin reductase 1, cytoplasmic              | [K].MTESVQSHIGSLNWGYR.[V]            | 1×TMT6plex [N] | 5      | Q9JMH6      | 0              | 2194.09      | 732.03   | -0.65      | 0.0        | 0.0   | 5.65 [215-231] | 17              |
| Thioredoxin reductase 1, cytoplasmic              | [R].TIGLETGVVK.[I]                   | 1×TMT6plex [K] | 8      | Q9JMH6      | 0              | 1474.92      | 737.97   | -0.26      | 0.4        | 0.9   | 0.57 [413-422] | 10              |
| Thioredoxin reductase 1, cytoplasmic              | [K].VLVLDFVTPTPLGTR.[W]              | 1×TMT6plex [N] | 11     | Q9JMH6      | 0              | 1857.10      | 929.05   | -1.34      | 0.0        | 0.0   | 4.81 [152-166] | 15              |
| Thioredoxin reductase 1, cytoplasmic              | [R].VTAQSTNSEETIEGEFNTVLLAVGR.[D]    | 1×TMT6plex [N] | 7      | Q9JMH6      | 0              | 2894.49      | 965.50   | -1.03      | 0.0        | 0.0   | 5.85 [383-407] | 25              |
| Thioredoxin reductase 1, cytoplasmic              | [R].VVGFGHVLGPNAGEVTTQGFAAALK.[C]    | 1×TMT6plex [K] | 6      | Q9JMH6      | 0              | 2740.56      | 914.19   | -0.38      | 0.0        | 0.0   | 7.40 [549-571] | 23              |
| Thioredoxin reductase 1, cytoplasmic              | [K].VVYENAYGR.[F]                    | 1×TMT6plex [N] | 4      | Q9JMH6      | 0              | 1299.69      | 650.35   | -0.82      | 0.0        | 0.0   | 3.24 [239-247] | 9               |
| Thioredoxin reductase 1, cytoplasmic              | [R].YLGIPGDK.[E]                     | 1×TMT6plex [K] | 5      | Q9JMH6      | 0              | 1320.79      | 660.90   | -0.54      | 0.0        | 0.0   | 2.05 [281-288] | 8               |
| Thioredoxin reductase 1, cytoplasmic              | [R].YLGIPGDKKEYCISDDFLSLPYCPGK.[T]   | 2×Carbamidomr  | 4      | Q9JMH6      | 1              | 3681.88      | 1227.96  | -0.27      | 0.0        | 0.0   | 5.82 [281-306] | 26              |
