# Supplementary material
Source: PubMed Central journal article supplement (PMC6592718)
Supplement: NIHMS1526751-supplement-13361_2019_2192_MOESM5_ESM.pdf [file NIHMS1526751-supplement-13361_2019_2192_MOESM5_ESM.pdf]

**Table S3: Comparison of the fold-differences in the temporal expression of selected selenoproteins in BMDMs before and after challenge with LPS in the absence or presence of LPS by western immunoblotting and MS methodologies.** WB: Western blotting; 0 Se represents no exogenous Se added; 250 nM Se represents addition of Se (as sodium selenite). Selenoproteins common in both methods are in bold.

| Sl.No    | Protein         | Fold change WB |             |             |             |              |             |              |             |
|----------|-----------------|----------------|-------------|-------------|-------------|--------------|-------------|--------------|-------------|
|          |                 | 0 Se           |             |             |             | 250 nM Se    |             |              |             |
|          |                 | 0 Hr           | 4 Hr        | 8 Hr        | 20 Hr       | 0 Hr         | 4 Hr        | 8 Hr         | 20 Hr       |
| <b>1</b> | <b>Gpx1</b>     | <b>1.00</b>    | <b>1.00</b> | <b>0.44</b> | <b>0.38</b> | <b>16.60</b> | <b>4.49</b> | <b>7.66</b>  | <b>3.95</b> |
| <b>2</b> | <b>Seleno W</b> | <b>1.00</b>    | <b>0.83</b> | <b>0.65</b> | <b>0.78</b> | <b>10.05</b> | <b>5.24</b> | <b>3.74</b>  | <b>4.31</b> |
| <b>3</b> | <b>Txnrd1</b>   | <b>1.00</b>    | <b>4.69</b> | <b>3.83</b> | <b>4.58</b> | <b>17.12</b> | <b>9.93</b> | <b>10.08</b> | <b>9.63</b> |

| Sl.No    | Protein         | Fold change Proteomics |             |             |             |             |             |             |             |
|----------|-----------------|------------------------|-------------|-------------|-------------|-------------|-------------|-------------|-------------|
|          |                 | 0 Se                   |             |             |             | 250 nM Se   |             |             |             |
|          |                 | 0 Hr                   | 4 Hr        | 8 Hr        | 20 Hr       | 0 Hr        | 4 Hr        | 8 Hr        | 20 Hr       |
| <b>1</b> | <b>Gpx1</b>     | <b>1.00</b>            | <b>0.89</b> | <b>0.82</b> | <b>0.87</b> | <b>4.67</b> | <b>4.49</b> | <b>4.39</b> | <b>5.63</b> |
| <b>2</b> | <b>Seleno W</b> | <b>1.00</b>            | <b>0.87</b> | <b>0.70</b> | <b>0.78</b> | <b>6.56</b> | <b>6.45</b> | <b>6.01</b> | <b>5.90</b> |
| <b>3</b> | <b>Txnrd1</b>   | <b>1.00</b>            | <b>0.94</b> | <b>0.84</b> | <b>0.98</b> | <b>1.34</b> | <b>1.30</b> | <b>1.11</b> | <b>1.42</b> |
| 4        | Msrb1           | 1.00                   | 0.88        | 0.78        | 0.94        | 4.14        | 3.57        | 3.03        | 4.74        |
| 5        | Selenom         | 1.00                   | 0.88        | 1.08        | 0.61        | 3.99        | 3.14        | 3.53        | 2.80        |
| 6        | Gpx4            | 1.00                   | 0.92        | 0.81        | 0.77        | 1.94        | 1.76        | 1.56        | 1.54        |
| 7        | Selenok         | 1.00                   | 1.30        | 1.35        | 1.91        | 1.43        | 2.03        | 1.79        | 2.52        |
| 8        | Selenos         | 1.00                   | 0.88        | 1.09        | 1.23        | 1.33        | 1.33        | 1.31        | 1.78        |
| 9        | Selenot         | 1.00                   | 0.97        | 1.16        | 1.08        | 1.43        | 1.45        | 1.56        | 1.64        |
| 10       | Selenof         | 1.00                   | 0.93        | 1.04        | 0.81        | 1.44        | 1.31        | 1.44        | 1.16        |
| 11       | Selenon         | 1.00                   | 0.74        | 0.70        | 0.85        | 1.37        | 1.04        | 0.76        | 0.80        |
| 12       | Txnrd2          | 1.00                   | 0.85        | 0.73        | 0.64        | 1.05        | 0.91        | 0.90        | 0.78        |
| 13       | Selenoi         | 1.00                   | 0.89        | 0.89        | 0.83        | 0.92        | 0.73        | 0.74        | 0.80        |
